# Supplementary material for: Coral and Coral-Associated Microorganisms: A Prolific Source of Potential Bioactive Natural Products
Source: PubMed Central journal article supplement (PMC6723858; doi:10.3390/md17080468), 2019-08-11
Supplement: marinedrugs-17-00468-s001.pdf [file marinedrugs-17-00468-s001.pdf]

## **List of supplementary tables about bioactive compounds from coral and its associated microorganisms**

Supplementary table S1. Anti-inflammatory compounds from coral

Supplementary table S2. Cytotoxic compounds from coral

Supplementary table S3. Antimicrobial compounds from coral

Supplementary table S4. Antiviral compounds from coral

Supplementary table S5. Antifouling compounds from coral

Supplementary table S6. Other bioactive compounds from coral

Supplementary table S7. Anti-inflammatory and cytotoxic compounds from coral-associated microorganisms

Supplementary table S8. Antimicrobial compounds from coral-associated microorganisms

Supplementary table S9. Antiviral compounds from coral-associated microorganisms

Supplementary table S10. Antifouling compounds from coral-associated microorganisms

Supplementary table S11. Other bioactive compounds from coral-associated microorganisms

Supplementary table S1. Anti-inflammatory compounds from coral

| Compounds          | Coral                               | Anti-inflammatory mechanism                              | Activity values                                                                     | Ref. |
|--------------------|-------------------------------------|----------------------------------------------------------|-------------------------------------------------------------------------------------|------|
| Lobophytone D      | <i>Lobophytum pauciflorum</i>       | Inhibiting LPS-induced NO release                        | IC <sub>50</sub> = 4.70 μM                                                          | [1]  |
| Flexibilisolide A  | <i>Sinularia</i> sp.                | Inhibiting LPS-induced iNOS                              | Reduce iNOS protein to 19.4 ± 4.5% at 10 μM                                         | [2]  |
| Flexilarin         | <i>Sinularia</i> sp.                | Inhibiting LPS-induced iNOS                              | Reduce iNOS protein to 13.8 ± 2.1% at 10 μM                                         | [2]  |
| Gyrosanol A        | <i>Sinularia gyrosa</i>             | Inhibiting LPS-induced COX-2                             | Inhibition percentage: 19.6 ± 3.9% at 10 μM                                         | [3]  |
| Gyrosanol B        | <i>Sinularia gyrosa</i>             | Inhibiting LPS-induced COX-2                             | Inhibition percentage: 29.1 ± 9.6% at 10 μM                                         | [3]  |
| Hirsutalin B       | <i>Cladiella hirsuta</i>            | Inhibiting LPS-induced iNOS, COX-2                       | Reduce iNOS and COX-2 protein to 6.8 ± 0.6% and 49.0 ± 2.3%, respectively at 10 μM  | [4]  |
| Hirsutalin C       | <i>Cladiella hirsuta</i>            | Inhibiting LPS-induced iNOS                              | Reduce iNOS protein to 43.6 ± 8.7% at 10 μM                                         | [4]  |
| Hirsutalin D       | <i>Cladiella hirsuta</i>            | Inhibiting LPS-induced iNOS                              | Reduce iNOS protein to 3.3 ± 0.1% at 10 μM                                          | [4]  |
| Hirsutalin H       | <i>Cladiella hirsuta</i>            | Inhibiting LPS-induced iNOS                              | Reduce iNOS protein to 32.3 ± 6.1% at 10 μM                                         | [4]  |
| Cespitularin S     | <i>Cespitularia hypotentaculata</i> | Inhibiting LPS-induced iNOS, COX-2                       | Reduce iNOS and COX-2 protein to 52.7 ± 3.2% and 78.3 ± 0.6%, respectively at 10 μM | [5]  |
| Cespitularin I     | <i>Cespitularia hypotentaculata</i> | Inhibiting LPS-induced iNOS                              | Reduce iNOS protein to 86.7 ± 8.4% at 10 μM                                         | [5]  |
| Cespitularin F     | <i>Cespitularia hypotentaculata</i> | Inhibiting LPS-induced iNOS                              | Reduce iNOS protein to 72.0 ± 15.1% at 10 μM                                        | [5]  |
| Klysimplexin R     | <i>Klyxum simplex</i>               | Inhibiting LPS-induced iNOS and COX-2                    | Reduce iNOS and COX-2 protein to < 20% and < 50%, respectively at 10 μM             | [6]  |
| Klysimplexin S     | <i>Klyxum simplex</i>               | Inhibiting LPS-induced iNOS and COX-2                    | Reduce iNOS and COX-2 protein to < 10% and < 40%, respectively at 10 μM             | [6]  |
| Klysimplexin J     | <i>Klyxum simplex</i>               | Inhibiting LPS-induced iNOS                              | Reduce iNOS protein to < 60% at 10 μM                                               | [6]  |
| Klysimplexin K     | <i>Klyxum simplex</i>               | Inhibiting LPS-induced iNOS                              | Reduce iNOS protein to < 40% at 10 μM                                               | [6]  |
| Klysimplexin L     | <i>Klyxum simplex</i>               | Inhibiting LPS-induced iNOS                              | Reduce iNOS protein to < 30% at 10 μM                                               | [6]  |
| Klysimplexin M     | <i>Klyxum simplex</i>               | Inhibiting LPS-induced iNOS                              | Reduce iNOS protein to < 20% at 10 μM                                               | [6]  |
| Klysimplexin N     | <i>Klyxum simplex</i>               | Inhibiting LPS-induced iNOS                              | Reduce iNOS protein to < 40% at 10 μM                                               | [6]  |
| Ximaolide F        | <i>Lobophytum laevigatum</i>        | Inhibiting TNFα-induced NF-κB transcriptional activation | IC <sub>50</sub> = 6.9 μM                                                           | [7]  |
| Methyl tortuoate B | <i>Lobophytum laevigatum</i>        | Inhibiting TNFα-induced NF-κB transcriptional activation | IC <sub>50</sub> = 6.7 μM                                                           | [7]  |
| Laevigatol A       | <i>Lobophytum laevigatum</i>        | Inhibiting TNFα-induced NF-κB transcriptional activation | IC <sub>50</sub> = 9.4 μM                                                           | [7]  |

|                                                                              |                                                              |                                                                                                  |                                                                                                                                  |       |
|------------------------------------------------------------------------------|--------------------------------------------------------------|--------------------------------------------------------------------------------------------------|----------------------------------------------------------------------------------------------------------------------------------|-------|
| Laevigatol B                                                                 | <i>Lobophytum laevigatum</i>                                 | Inhibiting TNF $\alpha$ -induced NF- $\kappa$ B transcriptional activation                       | IC <sub>50</sub> = 9.7 $\mu$ M                                                                                                   | [7]   |
| Sinularin                                                                    | <i>Sinularia triangularis</i><br><i>Sinularia flexibilis</i> | Inhibiting LPS-induced iNOS and COX-2;<br>Inhibiting LPS-induced NO release and TNF- $\alpha$    | Reduce iNOS protein to 1.2 $\pm$ 0.3% at 10 $\mu$ M; 88.60% inhibition (NO) and 94.20% inhibition (TNF- $\alpha$ ) at 10 $\mu$ M | [8,9] |
| Dihydrosinularin                                                             | <i>Sinularia triangularis</i>                                | Inhibiting LPS-induced iNOS and COX-2                                                            | Reduce iNOS and COX-2 protein to 5.1 $\pm$ 1.6% and 24.9 $\pm$ 7.4%, respectively at 10 $\mu$ M                                  | [8]   |
| (-)-14-deoxycrassin                                                          | <i>Sinularia triangularis</i>                                | Inhibiting LPS-induced iNOS and COX-2                                                            | Reduce iNOS and COX-2 protein to 0.9 $\pm$ 0.7% and 5.9 $\pm$ 1.0%, respectively at 10 $\mu$ M                                   | [8]   |
| Lobocrassin B                                                                | <i>Lobophytum crassum</i>                                    | Inhibiting superoxide anion generation and elastase release in FMLP/CB-induced human neutrophils | IC <sub>50</sub> = 4.8 $\pm$ 0.7 (superoxide anion) and 4.9 $\pm$ 0.4 $\mu$ M (elastase release)                                 | [10]  |
| Crassarine F                                                                 | <i>Sinularia crassa</i>                                      | Inhibiting LPS-induced COX-2                                                                     | Reduce COX-2 protein to 65.6 $\pm$ 6.2% at 10 $\mu$ M                                                                            | [11]  |
| Crassarine H                                                                 | <i>Sinularia crassa</i>                                      | Inhibiting LPS-induced iNOS                                                                      | Reduce iNOS protein to 35.8 $\pm$ 10.7% at 10 $\mu$ M                                                                            | [11]  |
| Krempfielin B                                                                | <i>Cladiella krempfi</i>                                     | Inhibiting LPS-induced iNOS                                                                      | Reduce iNOS protein to < 40% at 10 $\mu$ M                                                                                       | [12]  |
| Krempfielin C                                                                | <i>Cladiella krempfi</i>                                     | Inhibiting LPS-induced iNOS                                                                      | Reduce iNOS protein to < 60% at 10 $\mu$ M                                                                                       | [12]  |
| Krempfielin D                                                                | <i>Cladiella krempfi</i>                                     | Inhibiting LPS-induced iNOS                                                                      | Reduce iNOS protein to nearly 60% at 10 $\mu$ M                                                                                  | [12]  |
| Litophynol B                                                                 | <i>Cladiella krempfi</i>                                     | Inhibiting LPS-induced iNOS                                                                      | Reduce iNOS protein to < 40% at 10 $\mu$ M                                                                                       | [12]  |
| (1R*,2R*,3R*,6S*,7S*,9R*,10R*,14R*)-3-butanoyloxycladiell-11(17)-en-6,7-diol | <i>Cladiella krempfi</i>                                     | Inhibiting LPS-induced iNOS                                                                      | Reduce iNOS protein to nearly 10% at 10 $\mu$ M                                                                                  | [12]  |
| Paraminabeolide B                                                            | <i>Paraminabea acronocephala</i>                             | Inhibiting LPS-induced iNOS                                                                      | Reduce iNOS protein to 7.3 $\pm$ 1.0% at 10 $\mu$ M                                                                              | [13]  |
| Paraminabeolide C                                                            | <i>Paraminabea acronocephala</i>                             | Inhibiting LPS-induced iNOS                                                                      | Reduce iNOS protein to 37.9 $\pm$ 9.9% at 10 $\mu$ M                                                                             | [13]  |
| Paraminabeolide D                                                            | <i>Paraminabea acronocephala</i>                             | Inhibiting LPS-induced iNOS                                                                      | Reduce iNOS protein to 43.4 $\pm$ 9.5% at 10 $\mu$ M                                                                             | [13]  |
| Minabeolide-1                                                                | <i>Paraminabea acronocephala</i>                             | Inhibiting LPS-induced iNOS and COX-2                                                            | Reduce iNOS and COX-2 protein to 9.6 $\pm$ 1.9% and 18.3 $\pm$ 7.2%, respectively at 10 $\mu$ M                                  | [13]  |
| Minabeolide-2                                                                | <i>Paraminabea acronocephala</i>                             | Inhibiting LPS-induced iNOS and COX-2                                                            | Reduce iNOS and COX-2 protein to 45.7 $\pm$ 7.7% and 51.2 $\pm$ 11.5%, respectively at 10 $\mu$ M                                | [13]  |
| Minabeolide-4                                                                | <i>Paraminabea acronocephala</i>                             | Inhibiting LPS-induced iNOS and COX-2                                                            | Reduce iNOS and COX-2 protein to 23.2 $\pm$ 4.6% and 22.4 $\pm$ 9.9%, respectively at 10 $\mu$ M                                 | [13]  |
| Minabeolide-5                                                                | <i>Paraminabea acronocephala</i>                             | Inhibiting LPS-induced iNOS and COX-2                                                            | Reduce iNOS and COX-2 protein to 6.3 $\pm$ 1.5% and 31.3 $\pm$ 10.7%, respectively at 10 $\mu$ M                                 | [13]  |

|                               |                                  |                                                                                                  |                                                                                                                    |      |
|-------------------------------|----------------------------------|--------------------------------------------------------------------------------------------------|--------------------------------------------------------------------------------------------------------------------|------|
| Paraminabeolide A             | <i>Paraminabea acronocephala</i> | Inhibiting LPS-induced iNOS                                                                      | Reduce iNOS protein to $11.0 \pm 7.7\%$ at $10 \mu\text{M}$                                                        | [13] |
| Paraminabeolide B             | <i>Paraminabea acronocephala</i> | Inhibiting LPS-induced iNOS                                                                      | Reduce iNOS protein to $7.3 \pm 1.0\%$ at $10 \mu\text{M}$                                                         | [13] |
| Paraminabeolide C             | <i>Paraminabea acronocephala</i> | Inhibiting LPS-induced iNOS                                                                      | Reduce iNOS protein to $37.9 \pm 9.9\%$ at $10 \mu\text{M}$                                                        | [13] |
| Paraminabeolide D             | <i>Paraminabea acronocephala</i> | Inhibiting LPS-induced iNOS                                                                      | Reduce iNOS protein to $43.4 \pm 9.5\%$ at $10 \mu\text{M}$                                                        | [13] |
| Klymollin C                   | <i>Klyxum molle</i>              | Inhibiting LPS-induced iNOS                                                                      | Reduce iNOS protein to $42.1 \pm 11.5\%$ at $10 \mu\text{M}$                                                       | [14] |
| Klymollin D                   | <i>Klyxum molle</i>              | Inhibiting LPS-induced iNOS                                                                      | Reduce iNOS protein to $25.1 \pm 8.7\%$ at $10 \mu\text{M}$                                                        | [14] |
| Klymollin E                   | <i>Klyxum molle</i>              | Inhibiting LPS-induced iNOS                                                                      | Reduce iNOS protein to $25.7 \pm 8.0\%$ at $10 \mu\text{M}$                                                        | [14] |
| Klymollin F                   | <i>Klyxum molle</i>              | Inhibiting LPS-induced iNOS and COX-2                                                            | Reduce iNOS and COX-2 protein to $6.0 \pm 2.6\%$ and $8.5 \pm 1.3\%$ , respectively at $10 \mu\text{M}$            | [14] |
| Klymollin G                   | <i>Klyxum molle</i>              | Inhibiting LPS-induced iNOS and COX-2                                                            | Reduce iNOS and COX-2 protein to $5.2 \pm 2.5\%$ and $4.4 \pm 1.3\%$ , respectively at $10 \mu\text{M}$            | [14] |
| Klymollin H                   | <i>Klyxum molle</i>              | Inhibiting LPS-induced iNOS                                                                      | At a concentration of $10 \mu\text{M}$ , reduce the level of iNOS protein to $32.6 \pm 11.8\%$ at $10 \mu\text{M}$ | [14] |
| Sarcocrassocolide I           | <i>Sarcophyton crassocaule</i>   | Inhibiting LPS-induced iNOS and COX-2                                                            | Reduce iNOS and COX-2 protein to $< 10\%$ and $< 60\%$ , respectively at $10 \mu\text{M}$                          | [15] |
| Sarcocrassocolide F           | <i>Sarcophyton crassocaule</i>   | Inhibiting LPS-induced iNOS                                                                      | Reduce iNOS protein to $< 10\%$ at $10 \mu\text{M}$                                                                | [15] |
| Sarcocrassocolide G           | <i>Sarcophyton crassocaule</i>   | Inhibiting LPS-induced iNOS                                                                      | Reduce iNOS protein to $< 10\%$ at $10 \mu\text{M}$                                                                | [15] |
| Sarcocrassocolide H           | <i>Sarcophyton crassocaule</i>   | Inhibiting LPS-induced iNOS                                                                      | Reduce iNOS protein to $< 10\%$ at $10 \mu\text{M}$                                                                | [15] |
| Sarcocrassocolide J           | <i>Sarcophyton crassocaule</i>   | Inhibiting LPS-induced iNOS                                                                      | Reduce iNOS protein to $< 10\%$ at $10 \mu\text{M}$                                                                | [15] |
| Sarcocrassocolide K           | <i>Sarcophyton crassocaule</i>   | Inhibiting LPS-induced iNOS                                                                      | Reduce iNOS protein to $< 10\%$ at $10 \mu\text{M}$                                                                | [15] |
| Sarcocrassocolide L           | <i>Sarcophyton crassocaule</i>   | Inhibiting LPS-induced iNOS                                                                      | Reduce iNOS protein to $< 10\%$ at $10 \mu\text{M}$                                                                | [15] |
| Sinularioside                 | <i>Sinularia</i> sp.             | Inhibiting LPS-induced NO release                                                                | 58% inhibition at $30 \mu\text{M}$                                                                                 | [16] |
| Cerebroside                   | <i>Sinularia</i> sp.             | Inhibiting LPS-induced NO release                                                                | 16% inhibition at $30 \mu\text{M}$                                                                                 | [16] |
| Scabralin A                   | <i>Sinularia scabra</i>          | Inhibiting LPS-induced iNOS                                                                      | Reduce iNOS protein to $39.1 \pm 15.9\%$ at $10 \mu\text{M}$                                                       | [17] |
| Echinolabdane A               | <i>Echinomuricea</i> sp.         | Inhibiting superoxide anion generation and elastase release in FMLP/CB-induced human neutrophils | 68.6% and 35.4% inhibition at $10 \mu\text{M}$                                                                     | [18] |
| 6- <i>epi</i> -yonarasterol B | <i>Echinomuricea</i> sp.         | Inhibiting superoxide anion generation and elastase release in FMLP/CB-induced human neutrophils | $\text{IC}_{50} = 2.98 \pm 0.29$ v $1.13 \pm 0.55 \mu\text{g/mL}$                                                  | [18] |
| Lochmolin A                   | <i>Sinularia lochmodes</i>       | Inhibiting LPS-induced COX-2                                                                     | Reduce COX-2 protein to $1.7 \pm 1.3\%$ at $100 \mu\text{M}$                                                       | [19] |

|                                                                                                                  |                                   |                                                                                                      |                                                                                       |      |
|------------------------------------------------------------------------------------------------------------------|-----------------------------------|------------------------------------------------------------------------------------------------------|---------------------------------------------------------------------------------------|------|
| Lochmolin B                                                                                                      | <i>Sinularia lochmodes</i>        | Inhibiting LPS-induced COX-2                                                                         | Reduce COX-2 protein to 17.6 ± 2.2% at 100 µM                                         | [19] |
| Lochmolin C                                                                                                      | <i>Sinularia lochmodes</i>        | Inhibiting LPS-induced COX-2                                                                         | Reduce COX-2 protein to 32.8 ± 3.2% at 100 µM                                         | [19] |
| Lochmolin D                                                                                                      | <i>Sinularia lochmodes</i>        | Inhibiting LPS-induced COX-2                                                                         | Reduce COX-2 protein to 71.3 ± 7.2% at 100 µM                                         | [19] |
| Crassarosteroside A                                                                                              | <i>Sinularia crassa</i>           | Inhibiting LPS-induced iNOS                                                                          | Reduce iNOS protein to 12.9 ± 4.3% at 10 µM                                           | [20] |
| Crassarosteroside C                                                                                              | <i>Sinularia crassa</i>           | Inhibiting LPS-induced iNOS                                                                          | Reduce iNOS protein to 50.1 ± 6.3% at 10 µM                                           | [20] |
| Sarcocrassocolide M                                                                                              | <i>Sarcophyton crassocaule</i>    | Inhibiting LPS-induced iNOS and COX-2                                                                | Reduce iNOS and COX-2 protein to 4.2 ± 1.6% and 62.8 ± 22.4%, respectively at 10 µM   | [21] |
| Sarcocrassocolide N                                                                                              | <i>Sarcophyton crassocaule</i>    | Inhibiting LPS-induced iNOS and COX-2                                                                | Reduce iNOS and COX-2 protein to 4.2 ± 1.6% and 52.9 ± 12.8%, respectively at 10 µM   | [21] |
| Sarcocrassocolide O                                                                                              | <i>Sarcophyton crassocaule</i>    | Inhibiting LPS-induced iNOS and COX-2                                                                | Reduce iNOS and COX-2 protein to 4.2 ± 1.6% and 22.7 ± 2.8%, respectively at 10 µM    | [21] |
| Sclerosteroid A                                                                                                  | <i>Scleronephthya gracillimum</i> | Inhibiting LPS-induced iNOS and COX-2                                                                | Reduce iNOS and COX-2 protein to 28.4% and 5.4%, respectively at 10 µM                | [22] |
| Sclerosteroid B                                                                                                  | <i>Scleronephthya gracillimum</i> | Inhibiting LPS-induced iNOS and COX-2                                                                | Reduce iNOS and COX-2 protein to 27.7% and 6.7%, respectively at 10 µM                | [22] |
| Sclerosteroid E                                                                                                  | <i>Scleronephthya gracillimum</i> | Inhibiting LPS-induced iNOS and COX-2                                                                | Reduce iNOS and COX-2 protein to 25.4% and 20.6%, respectively at 10 µM               | [22] |
| 8 $\alpha$ H-3 $\beta$ ,11-dihydroxy-5 $\alpha$ ,6 $\alpha$ -<br>epoxy-24-methylene-9,11-<br>secocholestan-9-one | <i>Sinularia granosa</i>          | Inhibiting LPS-induced iNOS and COX-2                                                                | Reduce iNOS and COX-2 protein to 66.1 ± 11.9% and 42.7 ± 16.5%, respectively at 10 µM | [23] |
| 3 $\beta$ ,11-dihydroxy-5 $\beta$ ,6 $\beta$ -<br>epoxy-24-methylene-9,11-<br>secocholestan-9-one                | <i>Sinularia granosa</i>          | Inhibiting LPS-induced iNOS                                                                          | Reduce iNOS protein to 19.4 ± 2.1% at 10 µM                                           | [23] |
| Echinoclerodane A                                                                                                | <i>Echinomuricea</i> sp.          | Inhibiting the superoxide anion generation and elastase release in FMLP/CB-induced human neutrophils | 68.6% inhibition (superoxide anion) and 35.4% inhibition (elastase) at 10 µg/mL       | [24] |
| 6- <i>epi</i> -cladieunicellin F                                                                                 | <i>Cladiella</i> sp.              | Inhibiting the superoxide anion generation in FMLP/CB-induced human neutrophils                      | IC <sub>50</sub> = 6.57 ± 0.85 µg/mL                                                  | [25] |
| Flexibilide                                                                                                      | <i>Sinularia</i> sp.              | Inhibition of NF- $\kappa$ B activation                                                              | IC <sub>50</sub> = 5.30 µg/mL                                                         | [26] |
| Capillosanane B                                                                                                  | <i>Sinularia capillosa</i>        | Inhibiting production of TNF- $\alpha$                                                               | 16% inhibition at 10 µM                                                               | [27] |
| Capillosanane I                                                                                                  | <i>Sinularia capillosa</i>        | Inhibiting production of TNF- $\alpha$                                                               | 21% inhibition at 10 µM                                                               | [27] |
| (-)-Sinularone A                                                                                                 | <i>Sinularia capillosa</i>        | Inhibiting production of TNF- $\alpha$                                                               | 23% inhibition at 10 µM                                                               | [27] |
| 6-acetoxy litophynin E                                                                                           | <i>Cladiella krempfi</i>          | Inhibiting LPS-induced iNOS                                                                          | Reduce iNOS protein to 12.8 ± 2.9% at 10 µM                                           | [28] |

|                                                                                                                               |                                   |                                                                            |                                                                                                            |      |
|-------------------------------------------------------------------------------------------------------------------------------|-----------------------------------|----------------------------------------------------------------------------|------------------------------------------------------------------------------------------------------------|------|
| 6-methyl ether of litophynol B                                                                                                | <i>Cladiella krempfi</i>          | Inhibiting LPS-induced iNOS and COX-2                                      | Reduce iNOS and COX-2 protein to $6.4 \pm 0.8\%$ and $52.5 \pm 8.0\%$ , respectively at $10 \mu\text{M}$   | [28] |
| Scabrolide A                                                                                                                  | <i>Sinularia maxima</i>           | Inhibiting LPS-induced IL-12 and IL-6                                      | $\text{IC}_{50} = 23.52 \pm 1.37$ and $69.85 \pm 4.11 \mu\text{M}$                                         | [29] |
| 13- <i>epi</i> -scabrolide C                                                                                                  | <i>Sinularia maxima</i>           | Inhibiting LPS-induced IL-12 and IL-6                                      | $\text{IC}_{50} = 5.30 \pm 0.21$ and $13.12 \pm 0.64 \mu\text{M}$                                          | [29] |
| (22 <i>R</i> ,23 <i>R</i> ,24 <i>R</i> )-5 $\alpha$ ,8 $\alpha$ -epidioxy-22,23-methylene-24-methylcholest-6-en-3 $\beta$ -ol | <i>Lobophytum crassum</i>         | Inhibiting TNF $\alpha$ -induced NF- $\kappa$ B transcriptional activation | $\text{IC}_{50} = 3.90 \mu\text{M}$                                                                        | [30] |
| Ergosterol peroxide                                                                                                           | <i>Lobophytum crassum</i>         | Inhibiting TNF $\alpha$ -induced NF- $\kappa$ B transcriptional activation | $\text{IC}_{50} = 7.05 \mu\text{M}$                                                                        | [30] |
| Sclerosteroid J                                                                                                               | <i>Scleronephthya gracillimum</i> | Inhibiting LPS-induced iNOS and COX-2                                      | Reduce iNOS and COX-2 protein to $72.8 \pm 9.5\%$ and $28.4 \pm 4.9\%$ , respectively at $10 \mu\text{M}$  | [31] |
| Sclerosteroid K                                                                                                               | <i>Scleronephthya gracillimum</i> | Inhibiting LPS-induced iNOS and COX-2                                      | Reduce iNOS and COX-2 protein to $28.4 \pm 8.4\%$ and $9.0 \pm 4.4\%$ , respectively at $10 \mu\text{M}$   | [31] |
| Sclerosteroid M                                                                                                               | <i>Scleronephthya gracillimum</i> | Inhibiting LPS-induced iNOS and COX-2                                      | Reduce iNOS and COX-2 protein to $27.2 \pm 9.0\%$ and $11.8 \pm 6.8\%$ , respectively at $10 \mu\text{M}$  | [31] |
| Sclerosteroid N                                                                                                               | <i>Scleronephthya gracillimum</i> | Inhibiting LPS-induced iNOS and COX-2                                      | Reduce iNOS and COX-2 protein to $60.3 \pm 9.7\%$ and $26.6 \pm 10.0\%$ , respectively at $10 \mu\text{M}$ | [31] |
| 3-methyl-5-(10'-acetoxy-2',6',10'-trimethylundecyl)-2-penten-5-olide                                                          | <i>Scleronephthya gracillimum</i> | Inhibiting LPS-induced iNOS and COX-2                                      | Reduce iNOS and COX-2 protein to $61.8 \pm 9.8\%$ and $61.7 \pm 8.3\%$ , respectively at $10 \mu\text{M}$  | [31] |
| Sinularcasbane B                                                                                                              | <i>Sinularia sp.</i>              | Inhibiting LPS-induced NO release                                          | $\text{IC}_{50} = 8.3 \mu\text{M}$                                                                         | [32] |
| Sinularcasbanes E                                                                                                             | <i>Sinularia sp.</i>              | Inhibiting LPS-induced NO release                                          | $\text{IC}_{50} = 5.4 \mu\text{M}$                                                                         | [32] |
| Hyperinakin                                                                                                                   | <i>Hypericum nakamurai</i>        | Inhibiting LPS-induced NO release                                          | $\text{IC}_{50} = 20 \mu\text{M}$                                                                          | [33] |
| 3-geranyl-2,4,6-trihydroxybenzophenone                                                                                        | <i>Hypericum nakamurai</i>        | Inhibiting LPS-induced NO release                                          | $\text{IC}_{50} = 30 \mu\text{M}$                                                                          | [33] |
| Paraminabic acid A                                                                                                            | <i>Paraminabea acronocephala</i>  | Inhibiting LPS-induced iNOS                                                | Reduce iNOS protein to $63.9 \pm 6.3\%$ at $10 \mu\text{M}$                                                | [34] |
| Paraminabic acid B                                                                                                            | <i>Paraminabea acronocephala</i>  | Inhibiting LPS-induced iNOS                                                | $53.5 \pm 8.6\%$ inhibition at $10 \mu\text{M}$                                                            | [34] |
| Flexibilisquinone                                                                                                             | <i>Sinularia flexibilis</i>       | Inhibiting LPS-induced iNOS and COX-2                                      | Reduce iNOS and COX-2 protein to $< 50\%$ and nearly $80\%$ , respectively at $10 \mu\text{M}$             | [35] |
| Krempfielin K                                                                                                                 | <i>Cladiella krempfi</i>          | Inhibiting elastase release in FMLP/CB-induced human neutrophils           | $45.51 \pm 2.69\%$ inhibition at $10 \mu\text{M}$                                                          | [36] |
| Krempfielin M                                                                                                                 | <i>Cladiella krempfi</i>          | Inhibiting the elastase release in FMLP/CB-induced human neutrophils       | $27.30 \pm 5.42\%$ inhibition at $10 \mu\text{M}$                                                          | [36] |
| Klymollin M                                                                                                                   | <i>Klyxum molle</i>               | Inhibiting the superoxide anion generation and                             | $\text{IC}_{50} = 3.13 \pm 0.39 \mu\text{M}$ (superoxide anion) and $2.92 \pm$                             | [37] |

|                                             |                              |                                                                                                  |                                                                                        |      |
|---------------------------------------------|------------------------------|--------------------------------------------------------------------------------------------------|----------------------------------------------------------------------------------------|------|
|                                             |                              | elastase release in FMLP/CB-induced human neutrophils                                            | 0.27 $\mu$ M (elastase)                                                                |      |
| Litophynin F                                | <i>Cladiella krempfi</i>     | Inhibiting LPS-induced COX-2                                                                     | Reduce COX-2 protein to $48.1 \pm 10.8\%$ 10 $\mu$ M                                   | [28] |
| Hirsutalin K                                | <i>Cladiella hirsuta</i>     | Inhibiting LPS-induced iNOS                                                                      | IC <sub>50</sub> = 9.8 mg/mL                                                           | [38] |
| Sinularianin A                              | <i>Sinularia</i> sp.         | Inhibition of NF- $\kappa$ B activation                                                          | 41.3% inhibition at 10 $\mu$ g/mL                                                      | [39] |
| Sinularianin B                              | <i>Sinularia</i> sp.         | Inhibition of NF- $\kappa$ B activation                                                          | 29.6% inhibition at 10 $\mu$ g/mL                                                      | [39] |
| Sinularianin C                              | <i>Sinularia</i> sp.         | Inhibition of NF- $\kappa$ B activation                                                          | 24.3% inhibition at 10 $\mu$ g/mL                                                      | [39] |
| Sinularianin D                              | <i>Sinularia</i> sp.         | Inhibition of NF- $\kappa$ B activation                                                          | 43.0% inhibition at 10 $\mu$ g/mL                                                      | [39] |
| Sinularianin E                              | <i>Sinularia</i> sp.         | Inhibition of NF- $\kappa$ B activation                                                          | 30.0% inhibition at 10 $\mu$ g/mL                                                      | [39] |
| Sinularianin F                              | <i>Sinularia</i> sp.         | Inhibition of NF- $\kappa$ B activation                                                          | 36.1% inhibition at 10 $\mu$ g/mL                                                      | [39] |
| Lobocrasol A                                | <i>Lobophytum crassum</i>    | Inhibiting TNF $\alpha$ -induced NF- $\kappa$ B transcriptional activation                       | IC <sub>50</sub> = $6.30 \pm 0.42$ $\mu$ M                                             | [40] |
| Lobocrasol B                                | <i>Lobophytum crassum</i>    | Inhibiting TNF $\alpha$ -induced NF- $\kappa$ B transcriptional activation                       | IC <sub>50</sub> = $6.63 \pm 0.11$ $\mu$ M                                             | [40] |
| Crassumol E                                 | <i>Lobophytum crassum</i>    | Inhibiting TNF $\alpha$ -induced NF- $\kappa$ B transcriptional activation                       | IC <sub>50</sub> = $9.23 \pm 1.66$ $\mu$ M                                             | [41] |
| (1R,4R,2E,7E,11E)- cembra-2,7,11-trien-4-ol | <i>Lobophytum crassum</i>    | Inhibiting TNF $\alpha$ -induced NF- $\kappa$ B transcriptional activation                       | IC <sub>50</sub> = $1.65 \pm 0.2$ $\mu$ M                                              | [41] |
| Sinumaximol A                               | <i>Sinularia maxima</i>      | Inhibiting TNF $\alpha$ -induced NF- $\kappa$ B transcriptional activation                       | IC <sub>50</sub> = $21.35 \pm 3.21$ $\mu$ M                                            | [42] |
| Sinumaximol B                               | <i>Sinularia maxima</i>      | Inhibiting TNF $\alpha$ -induced NF- $\kappa$ B transcriptional activation                       | IC <sub>50</sub> = $29.10 \pm 1.54$ $\mu$ M                                            | [42] |
| Sethukarailin                               | <i>Sinularia maxima</i>      | Inhibiting TNF $\alpha$ -induced NF- $\kappa$ B transcriptional activation                       | IC <sub>50</sub> = $25.81 \pm 1.38$ $\mu$ M                                            | [42] |
| Sinumaximol G                               | <i>Sinularia maxima</i>      | Inhibiting TNF $\alpha$ -induced NF- $\kappa$ B transcriptional activation                       | IC <sub>50</sub> = $15.81 \pm 2.29$ $\mu$ M                                            | [42] |
| Yonarolide                                  | <i>Sinularia maxima</i>      | Inhibiting TNF $\alpha$ -induced NF- $\kappa$ B transcriptional activation                       | IC <sub>50</sub> = $25.1 \pm 2.58$ $\mu$ M                                             | [42] |
| 5-epinorcembrene                            | <i>Sinularia maxima</i>      | Inhibiting TNF $\alpha$ -induced NF- $\kappa$ B transcriptional activation                       | IC <sub>50</sub> = $28.19 \pm 2.65$ $\mu$ M                                            | [42] |
| 13- <i>epi</i> -scabrolide C                | <i>Sinularia maxima</i>      | Inhibiting TNF $\alpha$ -induced NF- $\kappa$ B transcriptional activation                       | IC <sub>50</sub> = $20.13 \pm 0.29$ $\mu$ M                                            | [42] |
| Rumphellol A                                | <i>Rumphella antipathies</i> | Inhibiting superoxide anion generation and elastase release in FMLP/CB-induced human neutrophils | 31.95% inhibition (superoxide anion) and 51.64% inhibition (elastase) at 10 $\mu$ g/mL | [43] |

|                                                 |                                  |                                                                                                  |                                                                                                 |      |
|-------------------------------------------------|----------------------------------|--------------------------------------------------------------------------------------------------|-------------------------------------------------------------------------------------------------|------|
|                                                 |                                  | neutrophils                                                                                      |                                                                                                 |      |
| Rumphellol B                                    | <i>Rumphella antipathies</i>     | Inhibiting superoxide anion generation and elastase release in FMLP/CB-induced human neutrophils | 42.22% inhibition (superoxide anion) and 42.10% inhibition (elastase) at 10 µg/mL               | [43] |
| Briaviolide E                                   | <i>Briareum violacea</i>         | Inhibiting superoxide anion generation and elastase release in FMLP/CB-induced human neutrophils | 34.17 ± 0.79% inhibition (superoxide anion) and 26.03 ± 9.51% inhibition (elastase) at 10 µg/mL | [44] |
| Briaviolide I                                   | <i>Briareum violacea</i>         | Inhibiting superoxide anion generation and elastase release in FMLP/CB-induced human neutrophils | 28.66 ± 1.99% inhibition (superoxide anion) and 28.81 ± 6.37% inhibition (elastase) at 10 µg/mL | [44] |
| Derivative                                      | <i>Briareum violacea</i>         | Inhibiting the elastase release in FMLP/CB-induced human neutrophils                             | 28.60 ± 7.54% inhibition at 10 µg/mL                                                            | [44] |
| Rumphellaic acid A                              | <i>Rumphella antipathies</i>     | Inhibiting the elastase release in FMLP/CB-induced human neutrophils                             | 29.2% inhibition at 10 µg/mL                                                                    | [45] |
| Sarcopanol A                                    | <i>Sarcophyton pauciplicatum</i> | Inhibiting TNFα/INFc-induced NF-κB transcriptional activation                                    | EC <sub>50</sub> = 8.27 ± 3.28 µM                                                               | [46] |
| (24S)-ergost-1β,3β,5α,6β-tetraol-25-monoacetate | <i>Sarcophyton pauciplicatum</i> | Inhibiting TNFα/INFc-induced NF-κB transcriptional activation                                    | EC <sub>50</sub> = 26.07 ± 5.59 µM                                                              | [46] |
| (24S)-ergost-25-ene-1β,3β,5α,6β-tetraol         | <i>Sarcophyton pauciplicatum</i> | Inhibiting TNFα/INFc-induced NF-κB transcriptional activation                                    | EC <sub>50</sub> = 50 µM                                                                        | [46] |
| Krempfielin N                                   | <i>Cladiella krempfi</i>         | Inhibiting the elastase release in FMLP/CB-induced human neutrophils                             | IC <sub>50</sub> = 4.94 ± 1.68 µM                                                               | [47] |
| Krempfielin O                                   | <i>Cladiella krempfi</i>         | Inhibiting the elastase release in FMLP/CB-induced human neutrophils                             | IC <sub>50</sub> > 10 µM                                                                        | [47] |
| Tortuosene B                                    | <i>Sarcophyton tortuosum</i>     | Inhibiting the elastase release in FMLP/CB-induced neutrophils                                   | 13.7 ± 3.5% inhibition at 10 µM                                                                 | [48] |
| Emblide                                         | <i>Sarcophyton tortuosum</i>     | Inhibiting the elastase release in FMLP/CB-induced neutrophils                                   | 29.2 ± 6.1% inhibition at 10 µM                                                                 | [48] |
| Sarcocrassocolide R                             | <i>Sarcophyton crassocaule</i>   | Inhibiting LPS-induced iNOS                                                                      | Reduce iNOS protein to 1.2% ± 0.3% at 10 µM                                                     | [49] |
| Crassocolide A                                  | <i>Sarcophyton crassocaule</i>   | Inhibiting LPS-induced iNOS and COX-2                                                            | Reduce iNOS and COX-2 protein to 3.5% ± 0.9% and 59.4% ± 21.4%, respectively at 10 µM           | [49] |
| Crassocolide B                                  | <i>Sarcophyton crassocaule</i>   | Inhibiting LPS-induced iNOS                                                                      | Reduce iNOS protein to 3.2% ± 0.7% at 10 µM                                                     | [49] |
| Crassocolide E                                  | <i>Sarcophyton crassocaule</i>   | Inhibiting LPS-induced iNOS and COX-2                                                            | Reduce iNOS and COX-2 protein to 1.4% ± 0.4% and 32.0% ± 15.3%, respectively at 10 µM           | [49] |
| Sarcocrassocolide P                             | <i>Sarcophyton crassocaule</i>   | Inhibiting LPS-induced iNOS and COX-2                                                            | Reduce iNOS protein to 1.3% ± 0.3% at 10 µM                                                     | [49] |

|                                                          |                                |                                                                                                      |                                                                                                                           |      |
|----------------------------------------------------------|--------------------------------|------------------------------------------------------------------------------------------------------|---------------------------------------------------------------------------------------------------------------------------|------|
| Sarcocrassocolide Q                                      | <i>Sarcophyton crassocaule</i> | Inhibiting LPS-induced iNOS and COX-2                                                                | Reduce iNOS and COX-2 protein to $2.4\% \pm 0.4\%$ and $58.3\% \pm 20.5\%$ , respectively at $10\ \mu\text{M}$            | [49] |
| Crassocolide D                                           | <i>Sarcophyton crassocaule</i> | Inhibiting LPS-induced iNOS and COX-2                                                                | Reduce iNOS protein to $3.2\% \pm 0.6\%$ at $10\ \mu\text{M}$                                                             | [49] |
| Hirsutalin N                                             | <i>Cladiella hirsuta</i>       | Inhibiting the elastase release in FMLP/CB-induced human neutrophils                                 | $31.7 \pm 3.2\%$ inhibition at $10\ \mu\text{g/mL}$                                                                       | [50] |
| Krempfielin P                                            | <i>Cladiella krempfi</i>       | Inhibiting the superoxide anion generation in FMLP/CB-induced human neutrophils                      | $\text{IC}_{50} > 10\ \mu\text{M}$                                                                                        | [47] |
| Tortuosene A                                             | <i>Sarcophyton tortuosum</i>   | Inhibiting the superoxide anion generation in FMLP/CB-induced neutrophils                            | $56.0 \pm 3.1\%$ inhibition at $10\ \mu\text{M}$                                                                          | [48] |
| Klymollin X                                              | <i>Klyxum molle</i>            | Inhibiting LPS-induced IL-6                                                                          | Reduce IL-6 level to nearly 60% at $25\ \mu\text{M}$                                                                      | [51] |
| Krempfielin Q                                            | <i>Cladiella krempfi</i>       | Inhibiting the superoxide anion generation and elastase release in FMLP/CB-induced human neutrophils | $5.46 \pm 5.19\%$ inhibition (superoxide anion) and $2.99 \pm 2.82\%$ inhibition (elastase) at $10\ \mu\text{M}$          | [52] |
| Krempfielin R                                            | <i>Cladiella krempfi</i>       | Inhibiting the superoxide anion generation in FMLP/CB-induced human neutrophils                      | $13.17\% \pm 2.09\%$ inhibition (superoxide anion) and $11.09\% \pm 5.55\%$ inhibition (elastase) at $10\ \mu\text{M}$    | [52] |
| Capgermacrene A                                          | <i>Capnella sp.</i>            | Inhibiting LPS-induced NO release                                                                    | 28.0% and 14.2% inhibition at 10 and $20\ \mu\text{g/mL}$                                                                 | [53] |
| Hirsutalin S                                             | <i>Cladiella hirsuta</i>       | Inhibition of superoxide anion generation and elastase release in FMLP/CB-induced human neutrophils  | $46.7\% \pm 8.0\%$ inhibition (elastase) and $5.8\% \pm 0.8\%$ inhibition (superoxide anion) at $10\ \mu\text{g/mL}$      | [54] |
| Hirsutalin T                                             | <i>Cladiella hirsuta</i>       | Inhibition of elastase release in FMLP/CB-induced human neutrophils                                  | $19.3\% \pm 5.6\%$ inhibition at $10\ \mu\text{g/mL}$                                                                     | [54] |
| Hirsutosteroside A                                       | <i>Cladiella hirsuta</i>       | Inhibition of elastase release in FMLP/CB-induced human neutrophils                                  | $\text{IC}_{50} = 4.1 \pm 0.1\ \mu\text{M}$                                                                               | [55] |
| Sinulerectol A                                           | <i>Sinularia erecta</i>        | Inhibition of superoxide anion generation and elastase release in FMLP/CB-induced human neutrophils  | $\text{IC}_{50} = 2.3 \pm 0.4\ \mu\text{M}$ (superoxide anion) and $\text{IC}_{50} = 0.9 \pm 0.1\ \mu\text{M}$ (elastase) | [56] |
| Sinulerectol B                                           | <i>Sinularia erecta</i>        | Inhibition of superoxide anion generation and elastase release in FMLP/CB-induced human neutrophils  | $\text{IC}_{50} = 8.5 \pm 0.3\ \mu\text{M}$ (superoxide anion) and $\text{IC}_{50} = 3.8 \pm 0.6\ \mu\text{M}$ (elastase) | [56] |
| (Z)-N-[2-(4-hydroxyphenyl)ethyl]-3-methyldodec-2-enamide | <i>Sinularia erecta</i>        | Inhibition of elastase release in FMLP/CB-induced human neutrophils                                  | $\text{IC}_{50} = 1.0 \pm 0.2\ \mu\text{M}$                                                                               | [56] |
| Klyflaccisteroid C                                       | <i>Klyxum flaccidum</i>        | Inhibition of superoxide anion generation and elastase release in FMLP/CB-induced human neutrophils  | $76.24 \pm 5.64\%$ inhibition (superoxide anion) and $88.38 \pm 1.19\%$ inhibition (elastase) at $10\ \mu\text{g/mL}$     | [57] |

|                                                                  |                             |                                                                                                                                            |                                                                                                                                                                                                              |      |
|------------------------------------------------------------------|-----------------------------|--------------------------------------------------------------------------------------------------------------------------------------------|--------------------------------------------------------------------------------------------------------------------------------------------------------------------------------------------------------------|------|
| Klyflaccisteroid F                                               | <i>Klyxum flaccidum</i>     | Inhibition of superoxide anion generation and elastase release in FMLP/CB-induced human neutrophils                                        | 88.26 ± 3.86% inhibition (superoxide anion) and 104.22 ± 6.55% inhibition (elastase) at 10 µg/mL                                                                                                             | [57] |
| 3β,11-dihydroxy-9,11-secogorgost-5-en-9-one                      | <i>Klyxum flaccidum</i>     | Inhibition of superoxide anion generation and elastase release in FMLP/CB-induced human neutrophils                                        | 87.00 ± 1.27% inhibition (superoxide anion) and 97.42 ± 7.76% inhibition (elastase) at 10 µg/mL                                                                                                              | [57] |
| Glaucumolide A                                                   | <i>Sarcophyton glaucum</i>  | Inhibition of superoxide anion generation and elastase release in FMLP/CB-induced human neutrophils                                        | 88.42 ± 3.97% inhibition (superoxide anion) and 88.94 ± 6.96% inhibition (elastase) at 10 µg/mL                                                                                                              | [58] |
| Glaucumolide B                                                   | <i>Sarcophyton glaucum</i>  | Inhibition of superoxide anion generation and elastase release in FMLP/CB-induced human neutrophils; inhibiting LPS-induced iNOS and COX-2 | 91.75 ± 3.08% inhibition (superoxide anion) and 103.25 ± 1.89% inhibition (elastase) at 10 µg/mL; reduce iNOS and COX-2 protein to 75.9 ± 3.5 and 64.3 ± 6.9%; and 43.4 ± 5.0 and 6.0 ± 3.6% at 10 and 20 µM | [58] |
| 24-methylenecholest-5-ene-3β,16β-diol-3-O-α-L-fucoside           | <i>Sinularia nanolobata</i> | Inhibition of superoxide anion generation and elastase release in FMLP/CB-induced human neutrophils                                        | IC <sub>50</sub> = 18.6 ± 1.5 µM (superoxide anion) and IC <sub>50</sub> = 10.1 ± 0.8µM (elastase)                                                                                                           | [55] |
| 5β,6β-epoxy-3β,11-dihydroxy-24-methylene9,11-secocholestan-9-one | <i>Sinularia nanolobata</i> | Inhibition of superoxide anion generation and elastase release in FMLP/CB-induced human neutrophils                                        | IC <sub>50</sub> = 6.6 ± 0.6 µM (superoxide anion) and IC <sub>50</sub> = 2.9 ± 0.5 µM (elastase)                                                                                                            | [55] |
| Columnariol A                                                    | <i>Nephthea columnaris</i>  | Inhibiting LPS-induced iNOS and COX-2                                                                                                      | 52.26 ± 3.74% and 60.17 ± 7.09% at 50 µM                                                                                                                                                                     | [59] |
| Columnariol B                                                    | <i>Nephthea columnaris</i>  | Inhibiting LPS-induced iNOS and COX-2                                                                                                      | 24.74 ± 0.02% and 49.79 ± 3.56% at 50 µM                                                                                                                                                                     | [59] |
| Sinumerolide A                                                   | <i>Sinularia numerosa</i>   | Inhibiting LPS-induced iNOS                                                                                                                | Reduce iNOS protein to 40.18 ± 6.23% at 10 µM                                                                                                                                                                | [60] |
| 7E-sinumerolide A                                                | <i>Sinularia numerosa</i>   | Inhibiting LPS-induced iNOS                                                                                                                | Reduce iNOS protein to 31.60 ± 2.15% at 10 µM                                                                                                                                                                | [60] |
| Ximaolide A                                                      | <i>Sarcophyton glaucum</i>  | Inhibiting LPS-induced iNOS                                                                                                                | Reduce COX-2 protein to 22.0 ± 6.5% at 20 µM                                                                                                                                                                 | [58] |
| Casbane-type diterpenoid 1                                       | <i>Lobophytum</i> sp.       | Inhibiting the LPS/IFN-γ-induced NO release                                                                                                | IC <sub>50</sub> = 41.21 µM                                                                                                                                                                                  | [61] |
| Cembrane diterpenoid 2                                           | <i>Lobophytum</i> sp.       | Inhibiting the LPS/IFN-γ-induced NO release                                                                                                | IC <sub>50</sub> = 64.96 µM                                                                                                                                                                                  | [61] |
| Cembrane diterpenoid 3                                           | <i>Lobophytum</i> sp.       | Inhibiting the LPS/IFN-γ-induced NO release                                                                                                | IC <sub>50</sub> = 74.76 µM                                                                                                                                                                                  | [61] |
| Klyflaccisteroid M                                               | <i>Klyxum flaccidum</i>     | Inhibition of elastase release in FMLP/CB-induced human neutrophils                                                                        | 79.24 ± 3.21% inhibition at 10 µM                                                                                                                                                                            | [62] |
| Klyflaccisteroid K                                               | <i>Klyxum flaccidum</i>     | Inhibition of superoxide anion generation and elastase release in FMLP/CB-induced human neutrophils                                        | 67.03 ± 5.26% inhibition (superoxide anion) and 111.14 ± 2.47% inhibition (elastase) at 10 µM                                                                                                                | [62] |
| Pinnisterol A                                                    | <i>Pinnigorgia</i> sp.      | Inhibition of superoxide anion generation and                                                                                              | IC <sub>50</sub> = 2.33 µM (superoxide anion) and IC <sub>50</sub> = 3.32 µM                                                                                                                                 | [63] |

|                                                                                 |                                |                                                                                                     |                                                                                               |      |
|---------------------------------------------------------------------------------|--------------------------------|-----------------------------------------------------------------------------------------------------|-----------------------------------------------------------------------------------------------|------|
|                                                                                 |                                | elastase release in FMLP/CB-induced human neutrophils                                               | (elastase)                                                                                    |      |
| Pinnisterol C                                                                   | <i>Pinnigorgia</i> sp.         | Inhibition of superoxide anion generation and elastase release in FMLP/CB-induced human neutrophils | IC <sub>50</sub> = 2.50 μM (superoxide anion) and IC <sub>50</sub> = 2.81 μM (elastase)       | [63] |
| Petasitosterone A                                                               | <i>Umbellulifera petasites</i> | Inhibiting LPS-induced NO release                                                                   | Reduce NO level to 16.9% at 10 μg/mL                                                          | [64] |
| 5α-pregna-1,20-dien-3-one                                                       | <i>Umbellulifera petasites</i> | Inhibiting LPS-induced NO release                                                                   | Reduce NO level to 0.3% at 10 μg/mL                                                           | [64] |
| Nephtenol                                                                       | <i>Lobophytum pauciflorum</i>  | Inhibiting LPS-induced iNOS and COX-2                                                               | IC <sub>50</sub> = 1.52 (iNOS) and 0.43 μM (COX-2)                                            | [65] |
| Gorgost-5-ene-3β-ol                                                             | <i>Lobophytum pauciflorum</i>  | Inhibiting LPS-induced iNOS and COX-2                                                               | IC <sub>50</sub> = 1.0 (iNOS) and 0.29 μM (COX-2)                                             | [65] |
| Briarenolide ZII                                                                | <i>Briareum</i> sp.            | Inhibiting LPS-induced iNOS                                                                         | Reduce iNOS protein to 47.2% at 10 μM                                                         | [66] |
| Briarenolide ZVI                                                                | <i>Briareum</i> sp.            | Inhibiting LPS-induced iNOS                                                                         | Reduce iNOS protein to 55.7% at 10 μM                                                         | [66] |
| Klyflaccisteroid J                                                              | <i>Klyxum flaccidum</i>        | Inhibition of superoxide anion generation and elastase release in FMLP/CB-induced human neutrophils | 76.35 ± 4.29% inhibition (superoxide anion) and 113.89 ± 2.99% inhibition (elastase) at 10 μM | [67] |
| (4S*,5S*)-4-hydroxy-5-(hydroxymethyl)-2,3-dimethyl-4-pentylcyclopent-2-en-1-one | <i>Sinularia verruca</i>       | Inhibiting LPS-induced NO release                                                                   | IC <sub>50</sub> = 28 μM                                                                      | [68] |
| 4-hydroxy-4-(ethylpropanoate)-2,3-dimethyl-5-butylcyclopent-2-en-1-one          | <i>Sinularia verruca</i>       | Inhibiting LPS-induced NO release                                                                   | IC <sub>50</sub> = 24 μM                                                                      | [68] |
| (4S*,5S*)-4-hydroxy-5-(ethoxymethyl)-2,3-dimethyl-4-pentylcyclopent-2-en-1-one  | <i>Sinularia verruca</i>       | Inhibiting LPS-induced NO release                                                                   | IC <sub>50</sub> = 26 μM                                                                      | [68] |
| Locrassumin A                                                                   | <i>Lobophytum crassum</i>      | Inhibiting LPS-induced NO release                                                                   | IC <sub>50</sub> = 17μM                                                                       | [69] |
| Locrassumin G                                                                   | <i>Lobophytum crassum</i>      | Inhibiting LPS-induced NO release                                                                   | IC <sub>50</sub> = 13μM                                                                       | [69] |
| Sarcophytonolide O                                                              | <i>Lobophytum crassum</i>      | Inhibiting LPS-induced NO release                                                                   | IC <sub>50</sub> = 8μM                                                                        | [69] |
| ent-sarcophine                                                                  | <i>Lobophytum crassum</i>      | Inhibiting LPS-induced NO release                                                                   | IC <sub>50</sub> = 24μM                                                                       | [69] |
| Ketoemblide                                                                     | <i>Lobophytum crassum</i>      | Inhibiting LPS-induced NO release                                                                   | IC <sub>50</sub> = 12μM                                                                       | [69] |
| Nanoculone B                                                                    | <i>Sinularia nanolobata</i>    | Inhibiting LPS-induced NO release                                                                   | Reduce NO level to 32.6% 100 μM                                                               | [70] |
| Nanolobol B                                                                     | <i>Sinularia nanolobata</i>    | Inhibiting LPS-induced NO release                                                                   | Reduce NO level to 8.0% at 100 μM                                                             | [70] |

|                                                  |                             |                                                                                                      |                                                                                                           |      |
|--------------------------------------------------|-----------------------------|------------------------------------------------------------------------------------------------------|-----------------------------------------------------------------------------------------------------------|------|
| Calyculone I                                     | <i>Sinularia nanolobata</i> | Inhibiting LPS-induced NO release                                                                    | Reduce NO level to 2.3% at 100 $\mu$ M                                                                    | [70] |
| Pinnigorgiol A                                   | <i>Pinnigorgia</i> sp.      | Inhibition of superoxide anion generation and elastase release in FMLP/CB-induced human neutrophils  | IC <sub>50</sub> = 4.0 $\mu$ M (superoxide anion) and IC <sub>50</sub> = 5.3 $\mu$ M (elastase)           | [63] |
| Pinnigorgiol B                                   | <i>Pinnigorgia</i> sp.      | Inhibition of superoxide anion generation and elastase release in FMLP/CB-induced human neutrophils  | IC <sub>50</sub> = 2.5 $\mu$ M (superoxide anion) and IC <sub>50</sub> = 3.1 $\mu$ M (elastase)           | [63] |
| Pinnigorgiol C                                   | <i>Pinnigorgia</i> sp.      | Inhibition of superoxide anion generation and elastase release in FMLP/CB-induced human neutrophils  | IC <sub>50</sub> = 2.7 $\mu$ M (superoxide anion) and IC <sub>50</sub> = 2.7 $\mu$ M (elastase)           | [63] |
| Sinubrasolide H                                  | <i>Sinularia brassica</i>   | Inhibition of elastase release in FMLP/CB-induced human neutrophils                                  | 32.4 $\pm$ 5.6% inhibition at 10 $\mu$ M                                                                  | [71] |
| Sarelengan B                                     | <i>Sarcophyton elegans</i>  | Inhibiting the LPS/IFN- $\gamma$ -induced NO production                                              | IC <sub>50</sub> = 18.2 $\mu$ M                                                                           | [72] |
| Sarelengan C                                     | <i>Sarcophyton elegans</i>  | Inhibiting the LPS/IFN- $\gamma$ -induced NO production                                              | IC <sub>50</sub> = 32.5 $\mu$ M                                                                           | [72] |
| Isofuscol                                        | <i>Lobophytum varium</i>    | Inhibition of elastase release in FMLP/CB-induced human neutrophils                                  | < 40% inhibition at 10 $\mu$ M                                                                            | [73] |
| (1R,2R,4S,17R)-loba-8,10,13(15)-trien-17,18-diol | <i>Lobophytum varium</i>    | Inhibition of elastase release in FMLP/CB-induced human neutrophils                                  | < 40% inhibition at 10 $\mu$ M                                                                            | [73] |
| Sinubrasolide J                                  | <i>Sinularia brassica</i>   | Inhibiting the superoxide anion generation in FMLP/CB-induced human neutrophils                      | 32.1 $\pm$ 5.3% inhibition at 10 $\mu$ M                                                                  | [71] |
| Sinubrasolide K                                  | <i>Sinularia brassica</i>   | Inhibiting the superoxide anion generation in FMLP/CB-induced human neutrophils                      | 34.3 $\pm$ 6.6% inhibition at 10 $\mu$ M                                                                  | [71] |
| Sinubrasolide L                                  | <i>Sinularia brassica</i>   | Inhibiting the superoxide anion generation and elastase release in FMLP/CB-induced human neutrophils | 26.3 $\pm$ 0.7% inhibition (superoxide anion) and 25.0 $\pm$ 1.3% inhibition (elastase) at 10 $\mu$ M     | [71] |
| Sinubrasolide A                                  | <i>Sinularia brassica</i>   | Inhibiting the superoxide anion generation and elastase release in FMLP/CB-induced human neutrophils | 87.7 $\pm$ 5.9% inhibition (superoxide anion) and 113.9 $\pm$ 1.8% inhibition (elastase) at 10 $\mu$ M    | [71] |
| Lobovarol E                                      | <i>Lobophytum varium</i>    | Inhibiting the superoxide anion generation and elastase release in FMLP/CB-induced human neutrophils | 20.59 $\pm$ 2.15% inhibition (superoxide anion) and 23.07 $\pm$ 6.55% inhibition (elastase) at 10 $\mu$ M | [73] |
| 17,18-epoxyloba-8,10,13(15)-trien-16-ol          | <i>Lobophytum varium</i>    | Inhibiting the superoxide anion generation and elastase release in FMLP/CB-induced human neutrophils | 28.16 $\pm$ 5.06% inhibition (superoxide anion) and 45.34 $\pm$ 4.08% inhibition (elastase) at 10 $\mu$ M | [73] |



|                 |                             |                                                                                                  |                                                                                                              |      |
|-----------------|-----------------------------|--------------------------------------------------------------------------------------------------|--------------------------------------------------------------------------------------------------------------|------|
|                 |                             | neutrophils                                                                                      |                                                                                                              |      |
| Michosterol B   | <i>Lobophytum michaelae</i> | Inhibiting superoxide anion generation and elastase release in FMLP/CB-induced human neutrophils | IC <sub>50</sub> = 7.1 ± 0.3 μM (superoxide anion) and IC <sub>50</sub> = 4.5 ± 0.9 μM (elastase )           | [76] |
| Michosterol C   | <i>Lobophytum michaelae</i> | Inhibiting superoxide anion generation and elastase release in FMLP/CB-induced human neutrophils | IC <sub>50</sub> > 10 μM (superoxide anion, elastase )                                                       | [76] |
| 14-deoxycrassin | <i>Sinularia flexibilis</i> | Inhibiting superoxide anion generation and elastase release in FMLP/CB-induced human neutrophils | IC <sub>50</sub> = 10.8 ± 0.38 (superoxide anion) and IC <sub>50</sub> = 11.0 ± 1.52 μM (elastase ) at 10 μM | [77] |

Supplementary table S2. Cytotoxic compounds from coral

| Compound                                                   | Coral species                    | Target cell lines                      | Activity value                                            | Ref. |
|------------------------------------------------------------|----------------------------------|----------------------------------------|-----------------------------------------------------------|------|
| Hirsutalin A                                               | <i>Cladiella hirsuta</i>         | Hep3B, A549, Ca9-22                    | IC <sub>50</sub> = 29, 28, 35 μM                          | [4]  |
| Hirsutalin F                                               | <i>Cladiella hirsuta</i>         | HepG2, Hep3B, MCF-7                    | IC <sub>50</sub> = 29, 29, 32 μM                          | [4]  |
| Hirsutalin E                                               | <i>Cladiella hirsuta</i>         | Hep3B, MDA-MB-231, MCF-7, A549, Ca9-22 | IC <sub>50</sub> = 14, 41, 35, 34, 34 μM                  | [4]  |
| 3,4-epoxy-nephtenol acetate                                | <i>Nephthea</i> sp.              | SF-268, MCF-7, H460                    | GI <sub>50</sub> > 100 μM                                 | [78] |
| Decaryiol                                                  | <i>Nephthea</i> sp.              | SF-268, MCF-7, H460                    | GI <sub>50</sub> > 100 μM                                 | [78] |
| 15-hydroxy-cembrenene                                      | <i>Nephthea</i> sp.              | SF-268, MCF-7, H460                    | GI <sub>50</sub> > 100 μM                                 | [78] |
| 2-hydroxy-nephtenol                                        | <i>Nephthea</i> sp.              | SF-268, MCF-7, H460                    | GI <sub>50</sub> > 100 μM                                 | [78] |
| Nephtenol                                                  | <i>Nephthea</i> sp.              | SF-268, MCF-7, H460                    | GI <sub>50</sub> > 100 μM                                 | [78] |
| Arachidonic acid                                           | <i>Nephthea</i> sp.              | SF-268, MCF-7, H460                    | GI <sub>50</sub> > 100 μM                                 | [78] |
| Lobophytene                                                | <i>Lobophytum</i> sp.            | A549, HT-29                            | IC <sub>50</sub> = 8.2, 5.6 μM                            | [79] |
| (1S,2S,3E,7E,11E)-3,7,11,15-cembratetraen-17,2-olide       | <i>Lobophytum</i> sp.            | A549, HT-29                            | IC <sub>50</sub> = 5.1, 1.8 μM                            | [79] |
| Diepoxycembrane A                                          | <i>Sinularia facile</i>          | HepG2                                  | IC <sub>50</sub> = 12.9 μg/mL                             | [80] |
| Lobatrienolide                                             | <i>Lobophytum compactum</i>      | A549, HL-60                            | IC <sub>50</sub> = 23.03 ± 0.76, 24.79 ± 0.77 μM          | [81] |
| 3β,11-dihydroxy-24-methylene-9,11-secocholestan-5-en-9-one | <i>Lobophytum compactum</i>      | A549, HL-60                            | IC <sub>50</sub> of 4.97 ± 0.06, 17.80 ± 1.43 μM          | [81] |
| (24S)-ergostane-3β,5α,6β,25-tetraol25-monoacetate          | <i>Lobophytum compactum</i>      | A549, HL-60                            | IC <sub>50</sub> = 42.76 ± 2.85 μM                        | [81] |
| Lobocompactol A                                            | <i>Lobophytum compactum</i>      | HL-60                                  | IC <sub>50</sub> = 48.24 ± 1.33 μM                        | [81] |
| Lobocompactol B                                            | <i>Lobophytum compactum</i>      | HL-60                                  | IC <sub>50</sub> = 37.51 ± 0.38 μM                        | [81] |
| (24S)-ergostane-3β,5α,-6β,25-tetraol                       | <i>Lobophytum compactum</i>      | HL-60                                  | IC <sub>50</sub> = 59.06 ± 2.31 μM                        | [81] |
| Lobatriene                                                 | <i>Lobophytum compactum</i>      | A549, HL-60                            | IC <sub>50</sub> = 31.13 ± 0.08, 33.82 ± 0.27 μM          | [81] |
| Lobocrassin A                                              | <i>Lobophytum crassum</i>        | K562, CCRF-CEM, Molt4, HepG2, Huh7     | IC <sub>50</sub> = 15.39, 5.33, 11.86, 32.16, 26.13 μg/ml | [10] |
| Lobocrassin B                                              | <i>Lobophytum crassum</i>        | K562, CCRF-CEM, Molt4, HepG2, Huh7     | IC <sub>50</sub> = 2.97, 0.48, 0.34, 3.44, 8.17 μg/ml     | [10] |
| Lobocrassin C                                              | <i>Lobophytum crassum</i>        | K562, CCRF-CEM, Molt4, HepG2, Huh7     | IC <sub>50</sub> = > 40, 11.55, 9.51, > 40, 39.77 μg/mL   | [10] |
| Lobocrassin D                                              | <i>Lobophytum crassum</i>        | K562, CCRF-CEM, Molt4, HepG2, Huh7     | IC <sub>50</sub> = 24, 10.53, 10.99, 34.91, > 40 μg/ml    | [10] |
| Paraminabeolide A                                          | <i>Paraminabea acronocephala</i> | HepG2                                  | IC <sub>50</sub> = 8.0 μM                                 | [13] |

|                                                                              |                                  |                                  |                                                                       |      |
|------------------------------------------------------------------------------|----------------------------------|----------------------------------|-----------------------------------------------------------------------|------|
| Minabeolide-1                                                                | <i>Paraminabea acronocephala</i> | HepG2, MCF-7                     | IC <sub>50</sub> = 5.2, 18.7 μM                                       | [13] |
| Paraminabeolide B                                                            | <i>Paraminabea acronocephala</i> | MDA-MB-231, MCF-7                | IC <sub>50</sub> = 19.3 and 14.9 μM                                   | [13] |
| (1R*,2R*,3R*,6S*,7S*,9R*,10R*,14R*)-3-butanoyloxycladiell-11(17)-en-6,7-diol | <i>Cladiella krempfi</i>         | A549, BT483, SAS                 | ED <sub>50</sub> = 15.8 ± 2.0, 8.5 ± 1.0, 14.3 ± 1.8 μg/mL            | [12] |
| Litophynol B                                                                 | <i>Cladiella krempfi</i>         | H1299, BT483                     | ED <sub>50</sub> = 18.1 ± 1.5, 13.2 ± 1.1 μg/mL                       | [12] |
| 13-acetoxysarcocrassolide                                                    | <i>Sarcophyton crassocaule</i>   | BFTC                             | Reduce the population of BFTC nearly 50% and < 30% at 1.5 and 3 μg/mL | [82] |
| 7β-acetoxy-8α-hydroxydeepoxysarcophine                                       | <i>Sarcophyton glaucum</i>       | HepG2, HCT-116, HeLa             | IC <sub>50</sub> = 3.6, 2.3, 6.7 μg/mL                                | [83] |
| (-)-14-deoxycrassin                                                          | <i>Sinularia triangular</i>      | CCRF-CEM, DLD-1                  | ED <sub>50</sub> = 29.8, 32.2 μM                                      | [8]  |
| Sinularin                                                                    | <i>Sinularia triangular</i>      | CCRF-CEM, DLD-1                  | ED <sub>50</sub> = 26.0, 37.1 μM                                      | [8]  |
| 12β,16β,20-trihydroxycholesta-1,4-dien-3-one-16-acetate                      | <i>Sinularia</i> sp.             | MCF-7, Bel-7402, HeLa            | IC <sub>50</sub> = 3.82, 14.47, 21.97 μg/mL                           | [84] |
| 24-methyl-12β,16β,20-trihydroxycholesta-1,4-dien-3-one                       | <i>Sinularia</i> sp.             | MCF-7, Bel-7402, HeLa            | IC <sub>50</sub> = 14.81, 45.05, 69.94 μg/mL                          | [84] |
| Culobophylin B                                                               | <i>Lobophytum crassum</i>        | HL60, DLD-1, HCT-116             | IC <sub>50</sub> = 6.8, 16.2, 16.7 μg/mL                              | [85] |
| Culobophylin A                                                               | <i>Lobophytum crassum</i>        | HL60, MDA-MB-231, DLD-1, HCT-116 | IC <sub>50</sub> = 3.0, 16.8, 4.6, 16.3 μg/mL                         | [85] |
| Capilloquinol                                                                | <i>Sinularia capillosa</i>       | P-388                            | ED <sub>50</sub> = 3.8 μg/mL                                          | [86] |
| Emblide                                                                      | <i>Lobophytum laevigatum</i>     | HL-60                            | IC <sub>50</sub> = 38.8 μM                                            | [7]  |
| (+)-sarcophine                                                               | <i>Lobophytum laevigatum</i>     | HL-60                            | IC <sub>50</sub> = 34.7 μM                                            | [7]  |
| Ximaolide F                                                                  | <i>Lobophytum laevigatum</i>     | HL-60, A549, HCT-116             | IC <sub>50</sub> = 9.0, 28.4, 16.4 μM                                 | [87] |
| (22S,24S)-24-methyl-22,25-epoxyfurost-5-ene-3β,20β-diol                      | <i>Lobophytum laevigatum</i>     | HCT-116                          | IC <sub>50</sub> = 6.9 μM                                             | [87] |
| (24S)-ergost-5-ene-3β,7α-diol                                                | <i>Lobophytum laevigatum</i>     | HCT-116                          | IC <sub>50</sub> = 18.1 μM                                            | [87] |
| Lobophytosterol                                                              | <i>Lobophytum laevigatum</i>     | HCT-116, A549, HL-60             | IC <sub>50</sub> = 3.2, 4.5, 5.6 μM                                   | [87] |
| Methyl tortuolate B                                                          | <i>Lobophytum laevigatum</i>     | HL-60, A549, HCT-116             | IC <sub>50</sub> = 25.8, 24.4, 19.7 μM                                | [7]  |
| Nyalolide                                                                    | <i>Lobophytum laevigatum</i>     | HL-60, A549, HCT-116, MCF-7      | IC <sub>50</sub> = 28.1, 28.7, 17.5, 35.5 μM                          | [7]  |
| Sarcocrassocolide F                                                          | <i>Sarcophyton crassocaule</i>   | Daoy, HEp-2, MCF-7, WiDr         | ED <sub>50</sub> = 7.3 ± 1.7, 15.0 ± 1.9, 19.4 ± 2.4, 18.4 ± 0.9 μM   | [15] |
| Sarcocrassocolide G                                                          | <i>Sarcophyton crassocaule</i>   | Daoy, HEp-2, MCF-7, WiDr         | ED <sub>50</sub> = 8.3 ± 1.4, 16.5 ± 1.7, 9.6 ± 2.7, 18.9 ± 1.9 μM    | [15] |
| Sarcocrassocolide H                                                          | <i>Sarcophyton crassocaule</i>   | Daoy, HEp-2, MCF-7, WiDr         | ED <sub>50</sub> = 6.4 ± 2.0, 13.5 ± 2.5, 9.4 ± 2.5, 18.7 ±           | [15] |

|                                                                                                          |                                   |                                     |                                                                                                   |      |
|----------------------------------------------------------------------------------------------------------|-----------------------------------|-------------------------------------|---------------------------------------------------------------------------------------------------|------|
|                                                                                                          |                                   |                                     | 1.0 $\mu\text{M}$                                                                                 |      |
| Sarcocrassocolide I                                                                                      | <i>Sarcophyton crassocaule</i>    | Daoy, HEp-2, MCF-7, WiDr            | $\text{ED}_{50} = 5.1 \pm 1.2, 5.8 \pm 0.5, 8.4 \pm 1.5, 6.4 \pm 2.0$<br>$\mu\text{M}$            | [15] |
| Sarcocrassocolide J                                                                                      | <i>Sarcophyton crassocaule</i>    | Daoy, HEp-2, MCF-7, WiDr            | $\text{ED}_{50} > 20 \mu\text{M}$                                                                 | [15] |
| Sarcocrassocolide K                                                                                      | <i>Sarcophyton crassocaule</i>    | Daoy, HEp-2, MCF-7, WiDr            | $\text{ED}_{50} = 9.9 \pm 4.0, >20, 10.2 \pm 1.0, > 20 \mu\text{M}$                               | [15] |
| Sarcocrassocolide L                                                                                      | <i>Sarcophyton crassocaule</i>    | Daoy, HEp-2, MCF-7, WiDr            | $\text{ED}_{50} > 20 \mu\text{M}$                                                                 | [15] |
| Asterolaurin L                                                                                           | <i>Asterospicularia Laurae</i>    | HEp-2, Daoy, MCF-7, WiDr            | $\text{ED}_{50} = 4.12, 6.23, 4.09, 6.08 \mu\text{g/mL}$                                          | [88] |
| Gorgosten-5(E)-3 $\beta$ -ol                                                                             | <i>Heteroxenia ghardaensis</i>    | Caco-2                              | $\text{IC}_{50} = 379.6 \mu\text{g/mL}$                                                           | [89] |
| Gorgostan-3 $\beta$ ,5 $\alpha$ ,6 $\beta$ ,11 $\alpha$ -tetraol                                         | <i>Heteroxenia ghardaensis</i>    | Caco-2                              | $\text{IC}_{50} = 2170.8 \mu\text{g/mL}$                                                          | [89] |
| Crassarosterol A                                                                                         | <i>Sinularia crassa</i>           | HepG2                               | $\text{IC}_{50} = 14.9 \mu\text{M}$                                                               | [20] |
| Crassarosteroside C                                                                                      | <i>Sinularia crassa</i>           | HepG2, HepG3                        | $\text{IC}_{50} = 17.6$ and $18.9 \mu\text{M}$                                                    | [20] |
| Echinoclerodane A                                                                                        | <i>Echinomuricea</i> sp.          | MOLT-4, HL-60, DLD-1, LoVo          | $\text{IC}_{50} = 13.18, 14.89, 23.44, 21.69 \mu\text{M}$                                         | [24] |
| 3 $\beta$ ,11-dihydroxy-5 $\beta$ ,6 $\beta$ -epoxy-24-methylene-9,11-secocholestan-9-one                | <i>Sinularia granosa</i>          | Daoy, MCF-7                         | $\text{ED}_{50} = 7.07 \pm 0.71, 9.98 \pm 0.32 \mu\text{g/mL}$                                    | [23] |
| 8 $\alpha$ H-3 $\beta$ ,11-dihydroxy-5 $\alpha$ ,6 $\alpha$ -epoxy-24-methylene-9,11-secocholestan-9-one | <i>Sinularia granosa</i>          | HeLa, HEp 2, Daoy, MCF-7            | $\text{ED}_{50} = 8.21 \pm 1.61, 6.21 \pm 1.38, 5.53 \pm 1.58,$<br>$4.99 \pm 0.70 \mu\text{g/mL}$ | [23] |
| Sinularone C                                                                                             | <i>Sinularia</i> sp.              | A2780, A549, BGC823, Bel7402, HCT-8 | $\text{IC}_{50} > 10 \mu\text{g/mL}$                                                              | [90] |
| Sinularone A                                                                                             | <i>Sinularia</i> sp.              | A2780, A549, BGC823, Bel7402, HCT-8 | $\text{IC}_{50} > 10 \mu\text{g/mL}$                                                              | [90] |
| Sinularone B                                                                                             | <i>Sinularia</i> sp.              | A2780, A549, BGC823, Bel7402, HCT-8 | $\text{IC}_{50} > 10 \mu\text{g/mL}$                                                              | [90] |
| Sinularone D                                                                                             | <i>Sinularia</i> sp.              | A2780, A549, BGC823, Bel7402, HCT-8 | $\text{IC}_{50} > 10 \mu\text{g/mL}$                                                              | [90] |
| Sinularone E                                                                                             | <i>Sinularia</i> sp.              | A2780, A549, BGC823, Bel7402, HCT-8 | $\text{IC}_{50} > 10 \mu\text{g/mL}$                                                              | [90] |
| Sinularone F                                                                                             | <i>Sinularia</i> sp.              | A2780, A549, BGC823, Bel7402, HCT-8 | $\text{IC}_{50} > 10 \mu\text{g/mL}$                                                              | [90] |
| Sinularone G                                                                                             | <i>Sinularia</i> sp.              | A2780, A549, BGC823, Bel7402, HCT-8 | $\text{IC}_{50} > 10 \mu\text{g/mL}$                                                              | [90] |
| Sinularone H                                                                                             | <i>Sinularia</i> sp.              | A2780, A549, BGC823, Bel7402, HCT-8 | $\text{IC}_{50} > 10 \mu\text{g/mL}$                                                              | [90] |
| Sinularone I                                                                                             | <i>Sinularia</i> sp.              | A2780, A549, BGC823, Bel7402, HCT-8 | $\text{IC}_{50} > 10 \mu\text{g/mL}$                                                              | [90] |
| Butenolide                                                                                               | <i>Sinularia</i> sp.              | A2780, A549, BGC823, Bel7402, HCT-8 | $\text{IC}_{50} > 10 \mu\text{g/mL}$                                                              | [90] |
| Ceratosteroid C                                                                                          | <i>Scleronephthya gracillimum</i> | HepG2, Hep3B, Ca9-22                | $\text{IC}_{50} = 46.1, 48.8, 44.3 \mu\text{M}$                                                   | [22] |
| Ceratosteroid D                                                                                          | <i>Scleronephthya gracillimum</i> | HepG2, Hep3B, Ca9-22, A-549, MCF-7  | $\text{IC}_{50} = 36.8, 35.3, 34.7, 46.2, 42.2 \mu\text{M}$                                       | [22] |
| Stereosteroid E                                                                                          | <i>Scleronephthya gracillimum</i> | Ca9-22                              | $\text{IC}_{50} = 36.6 \mu\text{M}$                                                               | [22] |
| Sclerosteroid H                                                                                          | <i>Scleronephthya gracillimum</i> | Hep3B, Ca9-22                       | $\text{IC}_{50} = 36.3, 37.9 \mu\text{M}$                                                         | [22] |

|                                                     |                                   |                                                          |                                                          |      |
|-----------------------------------------------------|-----------------------------------|----------------------------------------------------------|----------------------------------------------------------|------|
| Sterosteroid F                                      | <i>Scleronephthya gracillimum</i> | Hep3B, Ca9-22                                            | IC <sub>50</sub> = 32.2, 37.3 μM                         | [22] |
| Sclerosteroid A                                     | <i>Scleronephthya gracillimum</i> | HepG2 and MDA-MB-23                                      | IC <sub>50</sub> = 19.5 and 15.8 μM                      | [22] |
| Stereosteroid A                                     | <i>Scleronephthya gracillimum</i> | HepG2, Hep3B, Ca9-22                                     | IC <sub>50</sub> = 45.7, 44.4, 39.3 μM                   | [22] |
| Pregnene glycoside                                  | <i>Scleronephthya gracillimum</i> | HepG2, Hep3B, Ca9-22                                     | IC <sub>50</sub> = 32.1, 30.3, 28.4 μM                   | [22] |
| Sclerosteroid I                                     | <i>Scleronephthya gracillimum</i> | HepG2, Hep3B, Ca9-22, A-549                              | IC <sub>50</sub> = 37.4, 31.5, 30.8, 28.9 μM             | [22] |
| Sclerosteroid F                                     | <i>Scleronephthya gracillimum</i> | HepG2, Hep3B, Ca9-22, A-549, MCF-7, MDA-MB-231           | IC <sub>50</sub> = 35.6, 29.3, 28.9, 30.6, 38.7, 30.8 μM | [22] |
| Sclerosteroid G                                     | <i>Scleronephthya gracillimum</i> | HepG2, Hep3B, Ca9-22, A-549, MCF-7, MDA-MB-231           | IC <sub>50</sub> = 29.0, 28.1, 27.2, 28.7, 34.1, 28.0 μM | [22] |
| Stereosteroid H                                     | <i>Scleronephthya gracillimum</i> | HepG2, Hep3B, Ca9-22, A-549, MCF-7, MDA-MB-231           | IC <sub>50</sub> = 28.4, 28.9, 26.9, 29.7, 34.1, 27.8 μM | [22] |
| Stereosteroid D                                     | <i>Scleronephthya gracillimum</i> | HepG2, Hep3B, Ca9-22, A-549, MCF-7, MDA-MB-231           | IC <sub>50</sub> = 23.5, 26.8, 24.7, 28.9, 31.0, 27.0 μM | [22] |
| Stereosteroid G                                     | <i>Scleronephthya gracillimum</i> | HepG2, Hep3B, Ca9-22, A-549, MDA-MB-231                  | IC <sub>50</sub> = 33.2, 31.2, 28.1, 30.8, 32.0 μM       | [22] |
| Sclerosteroid B                                     | <i>Scleronephthya gracillimum</i> | HepG2, MDA-MB-231                                        | IC <sub>50</sub> = 35.0, 41.3 μM                         | [22] |
| Scabralin A                                         | <i>Sinularia scabra</i>           | MCF-7, WiDr, Daoy, HEpG2                                 | ED <sub>50</sub> = 9.6, 10.7, 7.6, 13.8 μg/mL            | [17] |
| 12(S)-hydroperoxysarcoph-10-ene                     | <i>Sarcophyton glaucum</i>        | Inhibiting phase I enzyme cytochrome P <sub>450</sub> 1A | IC <sub>50</sub> = 2.7 nM                                | [91] |
| 8- <i>epi</i> -sarcophinone                         | <i>Sarcophyton glaucum</i>        | Inhibiting phase I enzyme cytochrome P <sub>450</sub> 1A | IC <sub>50</sub> = 3.7 nM                                | [91] |
| <i>ent</i> -sarcophine                              | <i>Sarcophyton glaucum</i>        | Inhibiting phase I enzyme cytochrome P <sub>450</sub> 1A | IC <sub>50</sub> = 3.4 nM                                | [91] |
| Alcyonolide                                         | <i>Cespitularia</i> sp.           | HCT-116                                                  | IC <sub>50</sub> = 5.85 μM                               | [92] |
| Five new diterpenoids                               | <i>Cespitularia</i> sp.           | HCT-116                                                  | IC <sub>50</sub> = 28.18 to 91.35 μM                     | [92] |
| 24-methylenecholestane-3β,5α,6β-triol-6-monoacetate | <i>Sinularia</i> sp.              | Artemia salina, K562                                     | LC <sub>50</sub> = 0.96 μM, IC <sub>50</sub> = 3.18 μM   | [93] |
| Michaolide L                                        | <i>Lobophytum michaelae</i>       | A-549, HT-29, P-388, HEL                                 | ED <sub>50</sub> = 1.2, 0.8, 0.3, 1.0 μM                 | [94] |
| Michaolide M                                        | <i>Lobophytum michaelae</i>       | A-549, HT-29, P-388, HEL                                 | ED <sub>50</sub> = 2.0, 4.9, 1.5, 3.2 μM                 | [94] |
| Michaolide N                                        | <i>Lobophytum michaelae</i>       | A-549, HT-29, P-388, HEL                                 | ED <sub>50</sub> = 2.1, 1.6, 0.4, 2.0 μM                 | [94] |
| Michaolide P                                        | <i>Lobophytum michaelae</i>       | A-549, HT-29, P-388, HEL                                 | ED <sub>50</sub> = 2.0, 1.5, 1.0, 1.8 μM                 | [94] |
| Michaolide Q                                        | <i>Lobophytum michaelae</i>       | A-549, HT-29, P-388, HEL                                 | ED <sub>50</sub> = 1.9, 1.4, 0.4, 1.7 μM                 | [94] |
| (+)-12-ethoxycarbonyl-11Z-sarcophine                | <i>Sarcophyton ehrenbergi</i>     | A549, P-388                                              | IC <sub>50</sub> = 20.8, 5.8 μg/mL                       | [95] |
| Ehrenbergol B                                       | <i>Sarcophyton ehrenbergi</i>     | A549, P-388                                              | IC <sub>50</sub> = 10.2, 4.7 μg/mL                       | [95] |
| Ehrenbergol A                                       | <i>Sarcophyton ehrenbergi</i>     | P-388                                                    | IC <sub>50</sub> = 7.4 μg/mL                             | [95] |

|                                    |                                  |                                                |                                                                                                |       |
|------------------------------------|----------------------------------|------------------------------------------------|------------------------------------------------------------------------------------------------|-------|
| Nebrosteroid N                     | <i>Nephthea chabrolii</i>        | P-388                                          | ED <sub>50</sub> = 0.9 µg/mL                                                                   | [96]  |
| Nebrosteroid O                     | <i>Nephthea chabrolii</i>        | P-388                                          | ED <sub>50</sub> = 1.2 µg/mL                                                                   | [96]  |
| Nebrosteroid P                     | <i>Nephthea chabrolii</i>        | P-388                                          | ED <sub>50</sub> = 1.7 µg/mL                                                                   | [96]  |
| Sarcophytoxide                     | <i>Sarcophyton</i> sp.           | HepG2, Hep3B, MDA-MB-231, MCF-7, A549, Ca9-22  | IC <sub>50</sub> = 16.2, 12.4, 13.2, 13.2, 15.3, 18.9 µg/mL                                    | [97]  |
| Cyclobatriene                      | <i>Lobophytum pauciflorum</i>    | A431                                           | IC <sub>50</sub> = 0.64 µM                                                                     | [98]  |
| Eunicol                            | <i>Lobophytum pauciflorum</i>    | A431                                           | IC <sub>50</sub> = 0.35 µM                                                                     | [98]  |
| Fuscol                             | <i>Lobophytum pauciflorum</i>    | A431                                           | IC <sub>50</sub> = 0.52 µM                                                                     | [98]  |
| Lobatriene                         | <i>Lobophytum pauciflorum</i>    | A431                                           | IC <sub>50</sub> = 0.41 µM                                                                     | [98]  |
| 3β-hexadecanoylcholest-5-en-7β-one | <i>Antipathes dichotoma</i>      | HepG2, WI 38, VERO, MCF-7                      | IC <sub>50</sub> = 28.7, 30.5, 28.8, 29.1 µg/mL                                                | [99]  |
| 3β-hexadecanoylcholest-5-en-7β-ol  | <i>Antipathes dichotoma</i>      | HepG2, WI 38, VERO, MCF-7                      | IC <sub>50</sub> = 81.2, 82.6, 82.3, 78.2 µg/mL                                                | [99]  |
| Cholest-5-en-3β-yl-formate         | <i>Antipathes dichotoma</i>      | HepG2, WI 38, VERO, MCF-7                      | IC <sub>50</sub> = 38.1, 31.1, 39.6, 37.4 µg/mL                                                | [99]  |
| Thymidine                          | <i>Antipathes dichotoma</i>      | HepG2, WI 38, VERO, MCF-7                      | IC <sub>50</sub> = 45.1, 48.2, 20.5, 20.2 µg/mL                                                | [99]  |
| Indole-3-carboxaldehyde            | <i>Antipathes dichotoma</i>      | HepG2, WI 38, VERO, MCF-7                      | IC <sub>50</sub> = 70.5, 84.8, 72.4, 77.5 µg/mL                                                | [99]  |
| Sarcocrassocolide M                | <i>Sarcophyton crassocaule</i>   | Daoy, HEp-2, MCF-7, WiDr                       | ED <sub>50</sub> = 6.6 ± 0.8, 10.4 ± 1.1, 10.6 ± 0.5, >40 µM                                   | [21]  |
| Sarcocrassocolide N                | <i>Sarcophyton crassocaule</i>   | Daoy, HEp-2, MCF-7, WiDr                       | ED <sub>50</sub> = 5.2 ± 0.6, 12.3 ± 1.6, 10.1 ± 2.3, 30.1 ± 2.8 µM                            | [21]  |
| Sarcocrassocolide O                | <i>Sarcophyton crassocaule</i>   | Daoy, HEp-2, MCF-7, WiDr                       | ED <sub>50</sub> = 5.0 ± 0.7, 12.4 ± 2.1, 6.4 ± 0.5, >40 µM                                    | [21]  |
| 5-episinuleptolide acetate         | <i>Sinularia</i> sp.             | K562, MOLT-4, HTC-11, DLD-1, T-47D, MDA-MB-231 | IC <sub>50</sub> = 0.67, 0.59, 4.09, 0.92, 3.09, 2.95 µg/mL                                    | [100] |
| Paraminabic acid C                 | <i>Paraminabea acronocephala</i> | Hep3B, MDA-MB-231, MCF-7, A-549                | IC <sub>50</sub> = 2.83, 2.25, 2.23, 2.05 µg/mL                                                | [34]  |
| Krempfielin I                      | <i>Cladiella krempfi</i>         | A549, BT483, H1299, HepG2, SAS                 | ED <sub>50</sub> = 15.0 ± 3.5, 11.5 ± 1.8, 19.2 ± 4.0, 12.9 ± 3.1, 10.2 ± 3.5 µg/mL            | [28]  |
| Litophynin F                       | <i>Cladiella krempfi</i>         | A549, BT483, H1299, HepG2, SAS, BEAS2B         | ED <sub>50</sub> = 12.2 ± 1.1, 6.8 ± 0.6, 12.8 ± 1.2, 11.1 ± 0.4, 10.3 ± 0.5, 13.6 ± 0.5 µg/mL | [28]  |
| 6-acetoxy litophynin E             | <i>Cladiella krempfi</i>         | A549, BT483, H1299, SAS, BEAS2B                | ED <sub>50</sub> = 6.8 ± 1.0, 11.6 ± 2.8, 6.7 ± 0.7, 8.5 ± 1.3, 9.5 ± 3.7, 4.8 ± 0.7 µg/mL     | [28]  |
| 6-methyl ether of litophynol B     | <i>Cladiella krempfi</i>         | A549, BT483, H1299, SAS, BEAS2B                | ED <sub>50</sub> = 16.1 ± 1.2, 10.0 ± 1.8, 11.8 ± 1.0, 17.2 ± 0.4, 10.4 ± 0.3 µg/mL            | [28]  |
| 11-acetylsinuflexolide             | <i>Sinularia flexibilis</i>      | HeLa, HEp-2, MCF-7, MDA-MB-231                 | IC <sub>50</sub> = 9.5, 11.3, 17.8, 15.7 µg/mL                                                 | [101] |
| Sinuflexolide                      | <i>Sinularia flexibilis</i>      | HeLa, HEp-2, MCF-7, MDA-MB-231                 | IC <sub>50</sub> = 8.6, 8.2, 16.0, 11.3 µg/mL                                                  | [101] |

|                                                                        |                                   |                          |                                                       |       |
|------------------------------------------------------------------------|-----------------------------------|--------------------------|-------------------------------------------------------|-------|
| Sinularin                                                              | <i>Sinularia flexibilis</i>       | HEp-2, MCF-7, MDA-MB-231 | IC <sub>50</sub> = 12.6, 17.5, 13.5 µg/mL             | [101] |
| Sinubrasolide B                                                        | <i>Sinularia brassica</i>         | P388, MOLT 4, HT-29      | ED <sub>50</sub> = 9.1 ± 1.4, 4.8 ± 0.9, 4.8 ± 0.7 Mm | [102] |
| Sinubrasolide A                                                        | <i>Sinularia brassica</i>         | K562                     | ED <sub>50</sub> = 8.7 ± 1.4 µM                       | [102] |
| Sinubrasolide E                                                        | <i>Sinularia brassica</i>         | MOLT-4, HT-29            | ED <sub>50</sub> = 9.9 ± 1.8, 7.5 ± 1.5 µM            | [102] |
| Durumolide C                                                           | <i>Sinularia polydactyla</i>      | HepG2                    | IC <sub>50</sub> = 1.0 µg/mL                          | [103] |
| 24-methylcholestane-3β,5α,6β,25-tetrol 25-monoacetate                  | <i>Sinularia polydactyla</i>      | HepG2, HCT-116           | IC <sub>50</sub> = 6.1, 8.2 µg/mL                     | [103] |
| Sclerosteroid M                                                        | <i>Scleronephthya gracillimum</i> | HepG2, A549, MDA-MB-231  | IC <sub>50</sub> = 23.3, 21.9, 24.3 µM                | [31]  |
| Nepthoacetal                                                           | <i>Nepthtea</i> sp.               | HeLa                     | IC <sub>50</sub> = 12.3 µg/mL                         | [104] |
| (18S)-18-O-acetyl-nepthoacetal                                         | <i>Nepthtea</i> sp.               | HeLa                     | IC <sub>50</sub> = 10.1 µg/mL                         | [104] |
| (18R)-18-O-acetyl-nepthoacetal                                         | <i>Nepthtea</i> sp.               | HeLa                     | IC <sub>50</sub> = 19.6 µg/mL                         | [104] |
| (12b,22R)-12-acetoxy-22-hydroxy-cholesta-1,4-dien-3-one                | <i>Nepthtea</i> sp.               | HeLa                     | IC <sub>50</sub> = 7.51 ± 0.22 µg/mL                  | [104] |
| (12b,22R)-12-hydroxy-22-acetoxy-cholesta-1,4-dien-3-one                | <i>Nepthtea</i> sp.               | HeLa                     | IC <sub>50</sub> = 7.50 ± 0.31 µg/mL                  | [104] |
| (12b, 22R)-12, 22-diacetoxy-cholesta-1,4-dien-3-one                    | <i>Nepthtea</i> sp.               | HeLa                     | IC <sub>50</sub> = 18.48 ± 0.56 µg/mL                 | [104] |
| (22R)-18, 22-diacetoxy-cholesta-1,4dien-3-one                          | <i>Nepthtea</i> sp.               | HeLa                     | IC <sub>50</sub> = 8.29 ± 0.42 µg/mL                  | [104] |
| (20R,22R)-20-hydroxy-22-acetoxy-cholesta-1,4-dien-3-one                | <i>Nepthtea</i> sp.               | HeLa                     | IC <sub>50</sub> = 17.25 ± 0.61 µg/mL                 | [104] |
| Astrogorgol N                                                          | <i>Nepthtea</i> sp.               | HeLa                     | IC <sub>50</sub> = 18.72 ± 0.78 µg/mL                 | [104] |
| (24R)-gorgost-25-en-3β,5α,6β,11α-tetraol                               | <i>Sarcophyton</i> sp.            | K562                     | IC <sub>50</sub> = 9.9 µM                             | [105] |
| (24S)-23,24-dimethylcholest-22-en-3β,5α,6β,11α-tetraol                 | <i>Sarcophyton</i> sp.            | K562                     | IC <sub>50</sub> = 26.6 µg/mL                         | [105] |
| 11α-acetoxycholest-24-en-1α,3β,5α,6β-tetraol                           | <i>Sarcophyton</i> sp.            | K562, HL-60              | IC <sub>50</sub> = 10.1, 17.2 µM                      | [105] |
| 11α-acetoxy-cholest-24-en-3β,5α,6β-triol                               | <i>Sarcophyton</i> sp.            | K562, HL-60              | IC 50 = 9.1, 14.3 µM                                  | [105] |
| (24S)-11α-acetoxy-ergost-3β,5α,6β-triol                                | <i>Sarcophyton</i> sp.            | K562, HL-60              | IC <sub>50</sub> = 10.3, 12.8 µM                      | [105] |
| (24S)-ergost-3β,5α,6β,11α-tetraol                                      | <i>Sarcophyton</i> sp.            | K562, HL-60              | IC <sub>50</sub> = 24.5, 32.5 µM                      | [105] |
| (23R,24R,17Z)-11α-acetoxy-16β-methoxy-23,24-dimethylcholest-17(20)-en- | <i>Sarcophyton</i> sp.            | K562, HL-60, HeLa        | IC <sub>50</sub> = 17.3, 9.3, 17.0 µM                 | [105] |

|                                                                                                                                         |                                 |                                  |                                                                              |       |
|-----------------------------------------------------------------------------------------------------------------------------------------|---------------------------------|----------------------------------|------------------------------------------------------------------------------|-------|
| 3 $\beta$ ,5 $\alpha$ ,6 $\beta$ -triol                                                                                                 |                                 |                                  |                                                                              |       |
| (22 <i>E</i> ,24 <i>S</i> )-11 $\alpha$ -acetoxy-ergost-22, 25-dien-3 $\beta$ ,5 $\alpha$ ,6 $\beta$ -triol                             | <i>Sarcophyton</i> sp.          | K562, HL-60, HeLa                | IC <sub>50</sub> = 6.4, 10.5, 11.5 $\mu$ M                                   | [105] |
| (24 <i>R</i> )-11 $\alpha$ -acetoxy-gorgost-3 $\beta$ ,5 $\alpha$ ,6 $\beta$ -triol                                                     | <i>Sarcophyton</i> sp.          | K562, HL-60, HeLa                | IC <sub>50</sub> = 9.8, 14.6, 24.7 $\mu$ M                                   | [105] |
| (1 <i>R</i> *,3 <i>R</i> *,4 <i>R</i> *,14 <i>R</i> *,7 <i>E</i> ,11 <i>E</i> )-3,4-epoxycembra-7,11,15(17)-trien-16,14-olide           | <i>Lobophytum</i> sp.           | SGC7901, A549, MCF7, HCT116, B16 | IC <sub>50</sub> = 5.3, 6.1, 3.8, 5.2, 8.6 $\mu$ g/ml                        | [106] |
| (1 <i>R</i> *,7 <i>S</i> *,14 <i>S</i> *,3 <i>E</i> ,11 <i>E</i> )-7-hydroperoxycembra-3,8(19),11,15(17)-tetraen-16,14-olide            | <i>Lobophytum</i> sp.           | SGC7901, A549, MCF7, HCT116, B16 | IC <sub>50</sub> = 2.7, 3.2, 1.2, 4.5, 2.1 $\mu$ g/ml                        | [106] |
| (1 <i>R</i> *,7 <i>S</i> *,14 <i>S</i> *,3 <i>E</i> ,11 <i>E</i> )-18-acetoxy-7-hydroperoxycembra-3,8(19),11,15(17)-tetraen-16,14-olide | <i>Lobophytum</i> sp.           | SGC7901, A549, MCF7, HCT116, B16 | IC <sub>50</sub> = 2.3, 1.8, 2.9, 3.4, 5.6 $\mu$ g/ml                        | [106] |
| Klymollin M                                                                                                                             | <i>Klyxum molle</i>             | K562, MOLT-4, T47D               | ED <sub>50</sub> = 7.97 $\pm$ 2.55, 4.35 $\pm$ 0.63, 8.58 $\pm$ 1.72 $\mu$ M | [37]  |
| 24-methylcholesta-5,24-(28)-diene-3 $\beta$ ,7 $\beta$ ,19-triol                                                                        | <i>Litophyton arboreum</i>      | HeLa, U937                       | IC <sub>50</sub> = 8 $\pm$ 0.5, 16.4 $\pm$ 1.25 $\mu$ M                      | [107] |
| Sarcophytol M                                                                                                                           | <i>Litophyton arboreum</i>      | HeLa                             | IC <sub>50</sub> = 27.5 $\pm$ 0.2 $\mu$ M                                    | [107] |
| 7 $\beta$ -acetoxy-24-methylcholesta-5-24(28)-diene-3,19-diol                                                                           | <i>Litophyton arboreum</i>      | HeLa, U937                       | IC <sub>50</sub> = 5.3 $\pm$ 0.60, 10.6 $\pm$ 0.12 $\mu$ M                   | [107] |
| (4-(benzo[d][1,3]dioxol-5-ylmethyl)piperazin-1-yl)(5-((1 <i>E</i> ,5 <i>Z</i> )-2,6-dimethylocta-1,5,7-trienyl)furan-3-yl)methanone     | <i>Sinularia kavarattiensis</i> | THP1, DU145                      | IC <sub>50</sub> = 15.9, 17.9 $\mu$ M                                        | [108] |
| (4-benzhydrylpiperazin-1-yl)(5-((1 <i>E</i> ,5 <i>Z</i> )-2,6-dimethylocta-1,5,7-trienyl)furan-3-yl)methanone                           | <i>Sinularia kavarattiensis</i> | THP1, DU145                      | IC <sub>50</sub> = 17.5, 16.8 $\mu$ M                                        | [108] |
| Leptoclalin A                                                                                                                           | <i>Sinularia leptoclados</i>    | T47D, K-562                      | IC <sub>50</sub> = 15.4, 12.8 $\mu$ g/mL                                     | [109] |
| (22 <i>R</i> ,23 <i>R</i> ,24 <i>R</i> )-5 $\alpha$ ,8 $\alpha$ -epidioxy-22,23-methylene-24-methylcholest-6-en-3 $\beta$ -ol           | <i>Sinularia gaweli</i>         | HL-60                            | IC <sub>50</sub> = 12.14 $\mu$ g/ml                                          | [110] |
| 24-methylenecholestane-1 $\alpha$ ,3 $\beta$ ,5 $\alpha$ ,6 $\beta$ ,11 $\alpha$ -pentol                                                | <i>Sinularia gaweli</i>         | K562, MOLT-4, HL-60              | IC <sub>50</sub> = 9.71, 6.91, 3.39 $\mu$ g/ml                               | [110] |
| (22 <i>R</i> ,23 <i>R</i> ,24 <i>R</i> )-5 $\alpha$ ,8 $\alpha$ -epidioxy-22,23-methylene-24-methylcholest-6,9(11)-dien-3 $\beta$ -ol   | <i>Sinularia gaweli</i>         | MOLT-4                           | IC <sub>50</sub> = 15.7 $\mu$ g/ml                                           | [110] |

|                                                                                                                          |                                    |                                     |                                                                |       |
|--------------------------------------------------------------------------------------------------------------------------|------------------------------------|-------------------------------------|----------------------------------------------------------------|-------|
| 22 $\alpha$ -acetoxy-24-methylene-3 $\beta$ ,6 $\alpha$ ,11-trihydroxy-9,11-seco-cholest-7-en-9-one                      | <i>Sinularia nanolobata</i>        | P-388                               | IC <sub>50</sub> = 10.2 $\mu$ g/mL                             | [111] |
| 11-acetoxy-24-methylene-1 $\beta$ ,3 $\beta$ ,6 $\alpha$ -trihydroxy-9,11-seco-cholest-7-en-9-one                        | <i>Sinularia nanolobata</i>        | P-388                               | IC <sub>50</sub> = 27.8 $\mu$ g/mL                             | [111] |
| 5- <i>epi</i> -sinuleptolide                                                                                             | <i>Sinularia nanolobata</i>        | P-388                               | IC <sub>50</sub> = 15.7 $\mu$ g/mL                             | [111] |
| Litophynin F                                                                                                             | <i>Cladiella krempfi</i>           | C6                                  | IC <sub>50</sub> = 46 $\pm$ 3 $\mu$ M                          | [112] |
| Litophynol A                                                                                                             | <i>Cladiella krempfi</i>           | C6                                  | IC <sub>50</sub> = 70-80 $\mu$ M                               | [112] |
| Litophynol A acetate                                                                                                     | <i>Cladiella krempfi</i>           | C6                                  | IC <sub>50</sub> = 21 $\pm$ 2 $\mu$ M                          | [112] |
| Litophynol B                                                                                                             | <i>Cladiella krempfi</i>           | C6                                  | IC <sub>50</sub> = 70-80 $\mu$ M                               | [112] |
| Philippinlin A                                                                                                           | <i>Lemnalia philippinensis</i>     | HepG2, MDA-MB231, A549              | IC <sub>50</sub> = 16.0, 16.3, 15.8 $\mu$ g/mL                 | [113] |
| 7-keto-8 $\alpha$ -hydroxy-deepoxysarcophine                                                                             | <i>Sarcophyton ehrenbergi</i>      | MCF-7                               | IC <sub>50</sub> = 192.87 $\mu$ mol/mL                         | [114] |
| 7 $\beta$ -chloro-8 $\alpha$ -hydroxy-12-acetoxy-deepoxysarcophine                                                       | <i>Sarcophyton ehrenbergi</i>      | MCF-7                               | IC <sub>50</sub> = 68.57 $\mu$ mol/mL                          | [114] |
| ( <i>E</i> )-methyl-3-(5-butyl-1-hydroxy-2,3-dimethyl-4-oxocyclopent-2-enyl)acrylate                                     | <i>Sarcophyton ehrenbergi</i>      | MCF-7                               | IC <sub>50</sub> = 114.41 $\mu$ mol/mL                         | [114] |
| 5 $\alpha$ -pregna-1,20-dien-3-one                                                                                       | <i>Scleronephthya flexilis</i>     | MOLT-4, HL-60, K-562                | IC <sub>50</sub> = 2.15, 3.14, 8.32 $\mu$ g/mL                 | [115] |
| Dendronephthol A                                                                                                         | <i>Dendronephthya</i> sp.          | L5187Y                              | ED <sub>50</sub> = 8.4 $\mu$ g/mL                              | [116] |
| Dendronephthol C                                                                                                         | <i>Dendronephthya</i> sp.          | L5187Y                              | ED <sub>50</sub> = 6.8 $\mu$ g/mL                              | [116] |
| Klymollin W                                                                                                              | <i>Klyxum molle</i>                | CCRF-CEM, Molt-4, T47D              | ED <sub>50</sub> = 9.6, 8.5, 19.9 $\mu$ g/mL                   | [51]  |
| Klymollin X                                                                                                              | <i>Klyxum molle</i>                | CCRF-CEM, K562, Molt-4, T47D, DLD-1 | ED <sub>50</sub> = 4.2, 15.0, 16.5, 12.4 $\mu$ g/mL            | [51]  |
| Palustrol                                                                                                                | <i>Sarcophyton trocheliophorum</i> | Lymphoma and Erlich                 | LC <sub>50</sub> = 2.8, 3.11 $\mu$ M                           | [117] |
| Sarcophine                                                                                                               | <i>Sarcophyton trocheliophorum</i> | Lymphoma and Erlich                 | LC <sub>50</sub> = 2.5, 3.79 $\mu$ M                           | [117] |
| Sinulariaoid A                                                                                                           | <i>Sinularia</i> sp.               | HepG2/ADM                           | IC <sub>50</sub> = 9.70 $\pm$ 1.77 $\mu$ M                     | [118] |
| Sarcophine                                                                                                               | <i>Sarcophyton auritum</i>         | HepG2 and and MCF-7                 | IC <sub>50</sub> = 23 $\pm$ 0.12, 22.4 $\pm$ 0.22 $\mu$ g/mL   | [119] |
| 2- <i>epi</i> -sarcophine                                                                                                | <i>Sarcophyton auritum</i>         | HepG2 and and MCF-7                 | IC <sub>50</sub> = 20.6 $\pm$ 0.31, 19.7 $\pm$ 0.24 $\mu$ g/mL | [119] |
| (+)-7 $\alpha$ ,8 $\beta$ -dihydroxydeepoxysarcophine                                                                    | <i>Sarcophyton auritum</i>         | HepG2, MCF-7                        | IC <sub>50</sub> = 11 $\pm$ 0.22, 18.4 $\pm$ 0.16 $\mu$ g/mL   | [119] |
| (1 <i>R</i> ,2 <i>E</i> ,4 <i>S</i> ,6 <i>E</i> ,8 <i>R</i> ,11 <i>R</i> ,12 <i>R</i> )-2,6-cembradiene-4,8,11,12-tetrol | <i>Sarcophyton auritum</i>         | HepG2, MCF-7                        | IC <sub>50</sub> = 21.1 $\pm$ 0.16, 20 $\pm$ 0.12 $\mu$ g/mL   | [119] |
| Trisnorditerpenoid                                                                                                       | <i>Cespitularia</i> sp.            | HCT116                              | IC <sub>50</sub> = 6.04 $\mu$ M                                | [120] |
| Diterpenoid                                                                                                              | <i>Cespitularia</i> sp.            | HCT116                              | IC <sub>50</sub> = 47.0 $\mu$ M                                | [120] |
| Kelsoenethiol                                                                                                            | <i>Nephthea erecta</i>             | P-388, HT-29                        | ED <sub>50</sub> = 1.3, 1.8 $\mu$ g/mL                         | [121] |

|                                                                   |                                |                        |                                               |       |
|-------------------------------------------------------------------|--------------------------------|------------------------|-----------------------------------------------|-------|
| Sinugyrosanolide A                                                | <i>Sinularia gyrosa</i>        | P-388                  | EC <sub>50</sub> = 11.8 μM                    | [122] |
| Sarcophytolol                                                     | <i>Sarcophyton glaucum</i>     | HepG2                  | IC <sub>50</sub> = 20 μM                      | [123] |
| Sarcophytolide C                                                  | <i>Sarcophyton glaucum</i>     | HepG2, MCF-7           | IC <sub>50</sub> = 20, 29 μM                  | [123] |
| 10(14)-aromadendrene                                              | <i>Sarcophyton glaucum</i>     | HepG2, PC-3            | IC <sub>50</sub> = 20, 9.3 μM                 | [123] |
| Sarcophytolide B                                                  | <i>Sarcophyton glaucum</i>     | MCF-7                  | IC <sub>50</sub> = 25 μM                      | [123] |
| Hirsutalin E                                                      | <i>Cladiella hirsuta</i>       | A549                   | IC <sub>50</sub> = 37.2 μM                    | [50]  |
| Hirsutalin R                                                      | <i>Cladiella hirsuta</i>       | P388, K562             | IC <sub>50</sub> = 13.8, 36.3 μM              | [50]  |
| Crassocolide A                                                    | <i>Sarcophyton crassocaule</i> | DLD-1, CCRF-CEM        | ED <sub>50</sub> = 5.7, 6.3 μM                | [49]  |
| Sarcocrassocolide R                                               | <i>Sarcophyton crassocaule</i> | DLD-1, CCRF-CEM, HL-60 | ED <sub>50</sub> = 10.0, 28.1, 8.7 μM         | [49]  |
| Crassocolide B                                                    | <i>Sarcophyton crassocaule</i> | DLD-1, CCRF-CEM, HL-60 | ED <sub>50</sub> = 3.8, 8.7, 7.3 μM           | [49]  |
| Crassocolide E                                                    | <i>Sarcophyton crassocaule</i> | DLD-1, CCRF-CEM, HL-60 | ED <sub>50</sub> = 7.9, 11.1, 8.4 μM          | [49]  |
| Sarcocrassocolide P                                               | <i>Sarcophyton crassocaule</i> | DLD-1, CCRF-CEM, HL-60 | ED <sub>50</sub> = 21.8, 48.8, 24.9 μM        | [49]  |
| Sarcocrassocolide Q                                               | <i>Sarcophyton crassocaule</i> | DLD-1, CCRF-CEM, HL-60 | ED <sub>50</sub> = 35.8, 73.1, 18.6 μM        | [49]  |
| Crassocolide D                                                    | <i>Sarcophyton crassocaule</i> | DLD-1, CCRF-CEM, HL-60 | ED <sub>50</sub> = 27.7, 41.9, 34.6 μM        | [49]  |
| Gibberoketosterol                                                 | <i>Sinularia numerosa</i>      | P-388                  | ED <sub>50</sub> = 6.9 μM                     | [124] |
| Cespitulone A                                                     | <i>Cespitularia taeniata</i>   | Daoy, WiDr             | IC <sub>50</sub> = 8.7 and 6.7 μM             | [125] |
| Klyflaccisteroid A                                                | <i>Klyxum flaccidum</i>        | A549                   | ED <sub>50</sub> = 7.7 μg/mL                  | [57]  |
| Klyflaccisteroid C                                                | <i>Klyxum flaccidum</i>        | HT-29, A549            | ED <sub>50</sub> = 8.2, 6.1 μg/mL             | [57]  |
| Klyflaccisteroid E                                                | <i>Klyxum flaccidum</i>        | HT-29, P388            | ED <sub>50</sub> = 6.9, 3.7 μg/mL             | [57]  |
| Hirsutosteroside B                                                | <i>Cladiella hirsuta</i>       | K562, P388, HT-29      | IC <sub>50</sub> = 39.3, 10.2, 29.1 μM        | [55]  |
| Hirsutosteroside A                                                | <i>Cladiella hirsuta</i>       | K562, A549             | IC <sub>50</sub> = 27.6, 32.2 μM              | [55]  |
| 5β,6β-epoxy-3β,11-dihydroxy-24-methylene-9,11-secocholestan-9-one | <i>Sinularia nanolobata</i>    | K562, P388, HT-29      | IC <sub>50</sub> = 15.8, 15.5, 12.6 μM        | [55]  |
| Cladophenol glycoside A                                           | <i>Cladiella hirsuta</i>       | K562, P388, HT-29      | IC <sub>50</sub> = 18.5, 21.1, 20.3 μM        | [55]  |
| Sinulirectol C                                                    | <i>Sinularia erecta</i>        | K-562                  | IC <sub>50</sub> = 9.2 ± 3.3 μM               | [56]  |
| Glaucumolide A                                                    | <i>Sarcophyton glaucum</i>     | HL-60, CCRF-CEM        | ED <sub>50</sub> = 6.6 ± 1.2, 7.4 ± 1.5 μg/mL | [58]  |
| Sinulirectadione                                                  | <i>Sinularia erecta</i>        | K-562, MOLT-4          | IC <sub>50</sub> = 8.6 ± 1.1, 9.7 ± 2.9 μM    | [56]  |
| Glaucumolide B                                                    | <i>Sarcophyton glaucum</i>     | HL-60, CCRF-CEM        | ED <sub>50</sub> = 3.8 ± 0.9, 5.3 ± 1.4 μg/mL | [58]  |
| (Z)-N-[2-(4-hydroxyphenyl)ethyl]-3-                               | <i>Sinularia erecta</i>        | CCRF-CEM, MOLT-4       | IC <sub>50</sub> = 6.3 ± 1.5, 9.7 ± 3.6 μM    | [56]  |

|                                                                                          |                                  |                                                     |                                                                                 |       |
|------------------------------------------------------------------------------------------|----------------------------------|-----------------------------------------------------|---------------------------------------------------------------------------------|-------|
| methyldodec-2-enamide                                                                    |                                  |                                                     |                                                                                 |       |
| 3 $\alpha$ ,6 $\alpha$ -epidioxyhimachal-1-ene                                           | <i>Litophyton arboreum</i>       | MCF-7, HCT116, HepG-2                               | IC <sub>50</sub> = 19.1 $\pm$ 0.032 to 1000 $\mu$ M                             | [126] |
| 22-norergostane derivative,13,14-seco-22-norergosta-4,24(28)-dien-19-hydroperoxide-3-one | <i>Litophyton arboreum</i>       | MCF-7, HCT116, HepG-2                               | IC <sub>50</sub> from 19.1 $\pm$ 0.032 to 1000 $\mu$ M                          | [126] |
| 11-acetoxy-15,17-dihydroxy-2,12-epoxy-(3E,7E)-1-cembra-3,7-diene                         | <i>Litophyton arboreum</i>       | MCF-7, HCT116, HepG-2                               | IC <sub>50</sub> = 19.1 $\pm$ 0.032, 22.0 $\pm$ 0.092, 24.0 $\pm$ 0.032 $\mu$ M | [126] |
| Erythro-N-dodecanoyl-docosasphinga-(4E,8E)-dienine                                       | <i>Litophyton arboreum</i>       | MCF-7, HCT116, HepG-2                               | IC <sub>50</sub> = 19.1 $\pm$ 0.032 to 1000 $\mu$ M                             | [126] |
| Sarcophytol M                                                                            | <i>Litophyton arboreum</i>       | MCF-7, HCT116, HepG-2                               | IC <sub>50</sub> = 19.1 $\pm$ 0.032 to 1000 $\mu$ M                             | [126] |
| 7 $\beta$ -acetoxy-24-methylcholesta-5-24(28)-diene-3,19-diol                            | <i>Litophyton arboreum</i>       | MCF-7, HCT116, HepG-2                               | IC <sub>50</sub> = 19.1 $\pm$ 0.032 to 1000 $\mu$ M                             | [126] |
| (3 $\beta$ ,5 $\alpha$ ,6 $\beta$ ,22E)-3,5-dihydroxy-24-oxocholest-22-en-6-yl acetate   | <i>Sinularia acuta</i>           | HeLa                                                | IC <sub>50</sub> = 44.8 $\mu$ M                                                 | [127] |
| (3 $\beta$ ,5 $\alpha$ ,6 $\beta$ )-3,5-dihydroxyergost-24-ene-6,28-diyl diacetate       | <i>Sinularia acuta</i>           | HL-60, HeLa                                         | IC <sub>50</sub> = 7.3, 27.1 $\mu$ M                                            | [127] |
| 24-methylidenecholestane-3 $\beta$ ,5 $\alpha$ ,6 $\beta$ -triol 6-monoacetate           | <i>Sinularia acuta</i>           | HL-60, K562                                         | IC <sub>50</sub> = 9.9, 10.9 $\mu$ M                                            | [127] |
| (24S)-methylidenecholestane-3 $\beta$ ,5 $\alpha$ ,6i-triol 6-monoacetate                | <i>Sinularia acuta</i>           | K562, HeLa                                          | IC <sub>50</sub> = 11.7, 18.2 $\mu$ M                                           | [127] |
| Methyl tortuatoe B                                                                       | <i>Sarcophyton pauciplicatum</i> | HepG2, HL-60, KB, LNCaP, SK-Mel2, and SW480         | IC <sub>50</sub> = 11.60 $\pm$ 0.30 to 30.03 $\pm$ 5.61 $\mu$ M                 | [128] |
| Sarcophytolide M                                                                         | <i>Sarcophyton pauciplicatum</i> | HepG2, HL-60, KB, LNCaP, LU-1, MCF7, SK-Mel2, SW480 | IC <sub>50</sub> = 15.31 $\pm$ 0.80 to 44.01 $\pm$ 1.51 $\mu$ M                 | [128] |
| Sarcophytolide L                                                                         | <i>Sarcophyton pauciplicatum</i> | HepG2, HL-60, KB, LNCaP, LU-1, MCF7, SK-Mel2, SW480 | IC <sub>50</sub> = 47.39 $\pm$ 1.03 to 67.29 $\pm$ 2.91 $\mu$ M                 | [128] |
| Sarcophytolide I                                                                         | <i>Sarcophyton pauciplicatum</i> | HepG2, HL-60, KB, LNCaP, LU-1, MCF7, SK-Mel2, SW480 | IC <sub>50</sub> = 12.34 $\pm$ 0.17 to 37.87 $\pm$ 3.82 $\mu$ M                 | [128] |
| Sarcosarcophytolide J                                                                    | <i>Sarcophyton pauciplicatum</i> | HepG2, HL-60, KB, LNCaP, LU-1, MCF7, SK-Mel2, SW480 | IC <sub>50</sub> = 10.54 $\pm$ 0.33 to 34.35 $\pm$ 1.61 $\mu$ M                 | [128] |
| Methyl sartortuatoe                                                                      | <i>Sarcophyton pauciplicatum</i> | HepG2, HL-60, KB, LNCaP, LU-1, MCF7, SK-Mel2, SW480 | IC <sub>50</sub> = 7.93 $\pm$ 2.08 to 19.34 $\pm$ 0.72 $\mu$ M                  | [128] |
| Lobophytone U                                                                            | <i>Sarcophyton pauciplicatum</i> | HepG2, HL-60, KB, LNCaP, SK-Mel2, SW480             | IC <sub>50</sub> = 16.22 $\pm$ 0.22 to 94.18 $\pm$ 3.02 $\mu$ M                 | [128] |
| Ehrenbergol D                                                                            | <i>Sarcophyton ehrenbergi</i>    | P-388                                               | EC <sub>50</sub> = 2.0 $\mu$ M                                                  | [129] |

|                                                                                  |                                |                                                                                                              |                                                                |       |
|----------------------------------------------------------------------------------|--------------------------------|--------------------------------------------------------------------------------------------------------------|----------------------------------------------------------------|-------|
| Ehrenbergol E                                                                    | <i>Sarcophyton ehrenbergi</i>  | P-388                                                                                                        | EC <sub>50</sub> = 3.0 μM                                      | [129] |
| Columnariol A                                                                    | <i>Nephthea columnaris</i>     | LNCaP                                                                                                        | IC <sub>50</sub> = 9.80 μg/mL                                  | [59]  |
| Flexibilide                                                                      | <i>Sinularia flexibilis</i>    | Anti-tumor activity targeting the inositol-requiring 1/X-box-binding protein 1 (IRE1/XBP1) signaling pathway | IC <sub>50</sub> = 4.10 μg/mL                                  | [130] |
| Klysimplexin Q                                                                   | <i>Klyxum simplex</i>          | HepG2, Hep3B, MDA-MB-231, MCF-7, A549, Ca9-22                                                                | IC <sub>50</sub> = 53.2, 35.1, 44.0, 36.5, 40.5, 40.5 μM       | [130] |
| Klysimplexin T                                                                   | <i>Klyxum simplex</i>          | HepG2, Hep3B, MDA-MB-231, MCF-7, A549, Ca9-22                                                                | IC <sub>50</sub> = 34.3, 26.4, 44.0, 27.2, 42.0, 37.4 μM       | [130] |
| Petasitosterone B                                                                | <i>Umbellulifera petasites</i> | DLD-1                                                                                                        | IC <sub>50</sub> = 6.4 ± 1.4 μg/mL                             | [64]  |
| Petasitosterone C                                                                | <i>Umbellulifera petasites</i> | DLD-1                                                                                                        | IC <sub>50</sub> = 15.2 ± 3.5 μg/mL                            | [64]  |
| 5α-pregna-1,20-dien-3-one                                                        | <i>Umbellulifera petasites</i> | K-562, MOLT-4, DLD-1                                                                                         | IC <sub>50</sub> = 13.5 ± 3.1, 5.9 ± 1.9, 9.7 ± 3.2 μg/mL      | [64]  |
| Petasitosterone A                                                                | <i>Umbellulifera petasites</i> | MOLT-4, DLD-1                                                                                                | IC <sub>50</sub> = 12.1 ± 4.5, 5.8 ± 1.7 μg/mL                 | [64]  |
| Cembrene A                                                                       | <i>Lobophytum</i> sp.          | A. Salina and Erhlich                                                                                        | LD <sub>50</sub> = 25, 50 μg/mL                                | [131] |
| Nebrosteroid-M-[4α,24-dimethyl-5α-cholest-24(28)-en-3β,8β,11β-triol]             | <i>Litophyton mollis</i>       | A549                                                                                                         | IC <sub>50</sub> = 20.4 ± 1.1 μM                               | [132] |
| 4α,24-dimethyl-5α-cholest-24(28)-en-3β,8β,18-triol                               | <i>Litophyton mollis</i>       | K562, A549                                                                                                   | IC <sub>50</sub> = 8.9 ± 0.9, 25.7 ± 1.5 μM                    | [132] |
| (22E,24R)-4α,24-dimethyl-5α-cholest-22-en-3β,8β,11β-triol                        | <i>Litophyton mollis</i>       | K562, A549                                                                                                   | IC <sub>50</sub> = 7.7 ± 0.8, 20.8 ± 1.2 μM                    | [132] |
| Nebrosteroid-D-[(22E)-4α,24-dimethyl-5α-cholesta-22,24(28)-dien-3β,8β,11β-triol] | <i>Litophyton mollis</i>       | K562, A549                                                                                                   | IC <sub>50</sub> = 6.0 ± 0.5, 22.1 ± 1.4 μM                    | [132] |
| Nebrosteroid-A-[23-oxo-4α,24-dimethyl-5α-cholest-24(28)-en-3β,8β,11β-triol]      | <i>Litophyton mollis</i>       | K562                                                                                                         | IC <sub>50</sub> = 5.8 ± 0.8 μM                                | [132] |
| 23n-acetoxy-4α,24-dimethyl-5α-cholest-24(28)-en-3β,8β,11β-triol                  | <i>Litophyton mollis</i>       | K562                                                                                                         | IC <sub>50</sub> = 5.6 ± 1.2 μM                                | [132] |
| Suberosoid                                                                       | <i>Subergorgia suberosa</i>    | HeLa                                                                                                         | IC <sub>50</sub> = 10.6 μM                                     | [133] |
| Sarcophytosterol                                                                 | <i>Sinularia nanolobata</i>    | HL-60                                                                                                        | IC <sub>50</sub> = 89.02 ± 9.93 μM                             | [134] |
| 24(S),28-epoxyergost-5-ene-3β,4α-diol                                            | <i>Sinularia nanolobata</i>    | HL-60, HepG2, SW480                                                                                          | IC <sub>50</sub> = 33.53 ± 4.25, 64.35 ± 7.00, 71.02 ± 4.00 μM | [134] |
| Casbane-type diterpenoid 1                                                       | <i>Lobophytum</i> sp.          | HCT116                                                                                                       | IC <sub>50</sub> = 135.57 μM                                   | [61]  |
| Cembrane diterpenoid 2                                                           | <i>Lobophytum</i> sp.          | HCT116                                                                                                       | IC <sub>50</sub> = 177.11 μM                                   | [61]  |

|                                                                      |                            |                                  |                                                 |       |
|----------------------------------------------------------------------|----------------------------|----------------------------------|-------------------------------------------------|-------|
| Cembrane diterpenoid 3                                               | <i>Lobophytum</i> sp.      | HCT116                           | IC <sub>50</sub> = 153.11 μM                    | [61]  |
| 24-methyl-cholesta-5,24(28)-diene-3β,19-diol-7β-monoacetate          | <i>Nephthea erecta</i>     | K562, Molt-4, Sup-T1             | IC <sub>50</sub> = 11.2, 19.9, 16.3 μM          | [135] |
| Erectasteroid F                                                      | <i>Nephthea erecta</i>     | K562, Molt-4, Sup-T1, U937       | IC <sub>50</sub> = 6.5, 8.0, 8.0, 12.9 μM       | [135] |
| (3β,7β)-ergost-5,24(28)-diene-3β,7β,19-triol-7,19-diacetate          | <i>Nephthea erecta</i>     | K562, Molt-4, Sup-T1, U937       | IC <sub>50</sub> = 14.0, 7.9, 7.3, 6.8 μM       | [135] |
| Klyflaccisteroid J                                                   | <i>Klyxum flaccidum</i>    | HT-29, P388, K562                | IC <sub>50</sub> = 15.1, 14.8, 12.7 μM          | [67]  |
| Klyflaccisteroid H                                                   | <i>Klyxum flaccidum</i>    | P388                             | IC <sub>50</sub> = 15.5 μM                      | [67]  |
| Klyflaccisteroid K                                                   | <i>Klyxum flaccidum</i>    | HT-29, K562, A549, DLD-1         | IC <sub>50</sub> = 27.5, 22.5, 15.8, 27.5 μM    | [62]  |
| Klyflaccisteroid L                                                   | <i>Klyxum flaccidum</i>    | HT-29, P388                      | IC <sub>50</sub> = 36.7, 31.8 μM                | [62]  |
| Pinnisterol A                                                        | <i>Pinnigorgia</i> sp.     | HSC-T6                           | 46.5% inhibition at 10 μM                       | [63]  |
| Pinnigorgiol A                                                       | <i>Pinnigorgia</i> sp.     | HSC-T6                           | IC <sub>50</sub> = 5.77 ± 0.27 μM               | [63]  |
| Pinnigorgiol B                                                       | <i>Pinnigorgia</i> sp.     | HSC-T6                           | IC <sub>50</sub> = 7.89 ± 0.52 μM               | [63]  |
| Bisdioxycalamenene                                                   | <i>Rhytisma fulvum</i>     | Artemia salina                   | LD <sub>50</sub> = 15 μg/mL                     | [136] |
| Protoxenicin A                                                       | <i>Protodendron repens</i> | A-549, HT-29, MDA-MB-231         | GI <sub>50</sub> = 2.1, 0.6, 1.1 μM             | [137] |
| Protoxenicin B                                                       | <i>Protodendron repens</i> | A-549, HT-29, MDA-MB-231         | GI <sub>50</sub> = 6.3, 1.7, 6.1 μM             | [137] |
| Sarcoaldestero B                                                     | <i>Sarcophyton glaucum</i> | HepG2, MDA-MB-231, A-549         | IC <sub>50</sub> = 9.7, 14.0, 15.8 μg/mL        | [138] |
| Sarcomilasterol                                                      | <i>Sarcophyton glaucum</i> | MDA-MB-231, MOLT-4, SUP-T, U-937 | IC <sub>50</sub> = 13.8, 6.7, 10.5, 17.7 μg/mL  | [138] |
| Sinubrasolide H                                                      | <i>Sinularia brassica</i>  | P388, MOLT-4, K-562, HT-29       | IC <sub>50</sub> = 39.8, 28.6, 29.7, 24.4 μg/mL | [71]  |
| Sinubrasolide J                                                      | <i>Sinularia brassica</i>  | P388, MOLT-4, K-562, HT-29       | IC <sub>50</sub> = 18.7, 17.2, 12.6, 11.2 μg/mL | [71]  |
| Sinubrasolide K                                                      | <i>Sinularia brassica</i>  | P388, MOLT-4, K-562, HT-29       | IC <sub>50</sub> = 18.3, 13.7, 17.4, 20.5 μg/mL | [71]  |
| Sinubrasolide A                                                      | <i>Sinularia brassica</i>  | P388, MOLT-4, K-562, HT-29       | IC <sub>50</sub> = 29.9, 12.1, 8.7, 18.7 μg/mL  | [71]  |
| (1R,2E,4R,6R,7E,10S,11S,12R)-10,18-diacetoxydolabella-2,7-dien-6-one | <i>Clavularia viridis</i>  | A549, MCF-7                      | IC <sub>50</sub> = 10.5 and 12.6 μM             | [139] |
| Ergost-24(28)-ene-3,5,6-triol,(3β,5α,6β)-triol                       | <i>Sinularia terspilli</i> | HL60, K562                       | IC <sub>50</sub> = 0.004, 0.005 μM              | [140] |
| Ergost-24(28)-ene-1,3,6,11-tetraacetyl-5-ol, (1α,3β,5α,6β,11α)       | <i>Sinularia terspilli</i> | HL60, K563                       | IC <sub>50</sub> = 0.002, 0.003 μM              | [140] |
| Alismol                                                              | <i>Sinularia terspilli</i> | HL60, K564                       | IC <sub>50</sub> = 0.30, 0.35 μM                | [140] |
| 1S,4S,5S,10R-4,10-guaianediol                                        | <i>Sinularia terspilli</i> | HL60, K565                       | IC <sub>50</sub> = 0.21, 0.35 μm                | [140] |
| Clavirolide G                                                        | <i>Clavularia viridis</i>  | KB, HL-60                        | IC <sub>50</sub> = 15.4, 17.8 μmol/L            | [141] |

|                                       |                             |                               |                                            |      |
|---------------------------------------|-----------------------------|-------------------------------|--------------------------------------------|------|
| 14-deoxycrassin                       | <i>Sinularia flexibilis</i> | P-388, K-562                  | IC <sub>50</sub> = 16.0, 26.7 μM           | [77] |
| Dehydrosinulariolide                  | <i>Sinularia flexibilis</i> | P-388, K-562, HT-29           | IC <sub>50</sub> = 9.3, 23.4, 15.9 μM      | [77] |
| Sinulariolide                         | <i>Sinularia flexibilis</i> | K-562, HT-29                  | IC <sub>50</sub> = 21.7, 27.1 μM           | [77] |
| 11- <i>epi</i> -sinulariolide acetate | <i>Sinularia flexibilis</i> | P-388, K-562, HT-29           | IC <sub>50</sub> = 6.9, 12.2, 9.6 μM       | [77] |
| Michosterol A                         | <i>Lobophytum michaelae</i> | A549                          | IC <sub>50</sub> = 14.9 ± 5.7 μg/mL        | [76] |
| Sinulariolide                         | <i>Sinularia flexibilis</i> | HT-29, SNU-398, Capan-1       | IC <sub>50</sub> = 33.6, 24.7, 26.1 μM     | [74] |
| 5-dehydrosinulariolide                | <i>Sinularia flexibilis</i> | A549, HT-29, SNU-398, Capan-1 | IC <sub>50</sub> = 27.4, 22.7, 8.9, 9.4 μM | [74] |
| 11- <i>epi</i> -sinulariolide acetate | <i>Sinularia flexibilis</i> | HT-29, SNU-398, Capan-1       | IC <sub>50</sub> = 32.6, 24.9, 28.7 μM     | [74] |

Supplementary table S3. Antimicrobial compounds from coral

| Compound                                                                                    | Coral species                                  | Reference microorganisms                                                         | Activity value                   | Ref.  |
|---------------------------------------------------------------------------------------------|------------------------------------------------|----------------------------------------------------------------------------------|----------------------------------|-------|
| Sinularoside A                                                                              | <i>Sinularia humilis</i> Ofwegen               | <i>M. violaceum</i> , <i>S. tritici</i> , <i>B. megaterium</i> , <i>C. fusca</i> | D = 17, 14, 30, 12 mm            | [142] |
| Sinularoside B                                                                              | <i>Sinularia humilis</i> Ofwegen               | <i>M. violaceum</i> , <i>S. tritici</i> , <i>B. megaterium</i> , <i>C. fusca</i> | D = 17, 15, 30, 14 mm            | [142] |
| (3 $\beta$ ,5 $\alpha$ ,6 $\beta$ )-ergost-24(28)-en-3,5,6,19-tetrol 19-monoacetate         | <i>Sinularia depressa</i>                      | <i>S. aureus</i>                                                                 | MIC <sub>50</sub> = 15.6 $\mu$ M | [143] |
| Sarcophytolide                                                                              | <i>Sarcophyton trocheliophorum</i> Marenzeller | <i>S. aureus</i>                                                                 | MIC = 125 $\mu$ g/mL             | [144] |
| Sarcophine                                                                                  | <i>Sarcophyton glaucum</i>                     | <i>C. neoformans</i>                                                             | IC <sub>50</sub> = 20 $\mu$ g/mL | [145] |
| (22E,24S)-11 $\alpha$ -acetoxy-ergostane-22,25-dien-3 $\beta$ ,5 $\alpha$ ,6 $\beta$ -triol | <i>Sarcophyton</i> sp.                         | <i>E. coli</i> , <i>B. megaterium</i> , <i>M. violaceum</i> , <i>S. tritici</i>  | D = 14.5, 12, 10, 7.5 mm         | [146] |
| (24S)-11 $\alpha$ -acetoxy-ergostane-3 $\beta$ ,5 $\alpha$ ,6 $\beta$ -triol                | <i>Sarcophyton</i> sp.                         | <i>E. coli</i> , <i>B. megaterium</i> , <i>M. violaceum</i> , <i>S. tritici</i>  | D = 7.0, 7.5, 6.0, 6.5 mm        | [146] |
| (24S)-23,24-dimethylcholesta-22-en-3 $\beta$ ,5 $\alpha$ ,6 $\beta$ ,11 $\alpha$ -tetraol   | <i>Sarcophyton</i> sp.                         | <i>E. coli</i> , <i>B. megaterium</i> , <i>M. violaceum</i> , <i>S. tritici</i>  | D = 6.0, 7.0, 7.5, 9.0 mm        | [146] |
| (24S)-ergostane-1 $\alpha$ ,3 $\beta$ ,5 $\alpha$ ,6 $\beta$ ,11 $\alpha$ -pentaol          | <i>Sarcophyton</i> sp.                         | <i>E. coli</i> , <i>B. megaterium</i> , <i>M. violaceum</i> , <i>S. tritici</i>  | D = 7.5, 4.5, 7.0, 10.5 mm       | [146] |
| (24S)-ergostane-3 $\beta$ ,5 $\alpha$ ,6 $\beta$ ,11 $\alpha$ -tetraol                      | <i>Sarcophyton</i> sp.                         | <i>E. coli</i> , <i>B. megaterium</i> , <i>M. violaceum</i> , <i>S. tritici</i>  | D = 6.0, 8.5, 8.5, 4.5 mm        | [146] |
| (24S)-ergostane-3 $\beta$ ,5 $\alpha$ ,6 $\beta$ -triol                                     | <i>Sarcophyton</i> sp.                         | <i>E. coli</i> , <i>B. megaterium</i> , <i>M. violaceum</i> , <i>S. tritici</i>  | D = 4.5, 4.5, 7.0, 6.5 mm        | [146] |
| (24S)-ergostane-7-en-3 $\beta$ ,5 $\alpha$ ,6 $\beta$ -triol                                | <i>Sarcophyton</i> sp.                         | <i>E. coli</i> , <i>B. megaterium</i> , <i>M. violaceum</i> , <i>S. tritici</i>  | D = 6.0, 7.0, 6.0, 6.0 mm        | [146] |
| 11 $\alpha$ -acetoxy-cholesta-24-en-3 $\beta$ ,5 $\alpha$ ,6 $\beta$ -triol                 | <i>Sarcophyton</i> sp.                         | <i>E. coli</i> , <i>B. megaterium</i> , <i>M. violaceum</i> , <i>S. tritici</i>  | D = 12, 10, 6.5, 10.5 mm         | [146] |
| 11 $\alpha$ -acetoxy-gorgostane-3 $\beta$ ,5 $\alpha$ ,6 $\beta$ ,12 $\alpha$ -tetraol      | <i>Sarcophyton</i> sp.                         | <i>E. coli</i> , <i>B. megaterium</i> , <i>M. violaceum</i> , <i>S. tritici</i>  | D = 9.5, 10, 8.5, 10 mm          | [146] |
| 11 $\alpha$ -acetoxy-gorgostane-3 $\beta$ ,5 $\alpha$ ,6 $\beta$ -triol                     | <i>Sarcophyton</i> sp.                         | <i>E. coli</i> , <i>B. megaterium</i> , <i>M. violaceum</i> , <i>S. tritici</i>  | D = 7.0, 8.0, 9.5, 10 mm         | [146] |
| 12 $\alpha$ -acetoxy-gorgostane-3 $\beta$ ,5 $\alpha$ ,6 $\beta$ ,11 $\alpha$ -tetraol      | <i>Sarcophyton</i> sp.                         | <i>E. coli</i> , <i>B. megaterium</i> , <i>M. violaceum</i> , <i>S. tritici</i>  | D = 8.0, 10, 7.0, 4.5 mm         | [146] |
| Gorgostane-1 $\alpha$ ,3 $\beta$ ,5 $\alpha$ ,6 $\beta$ ,11 $\alpha$ -pentaol               | <i>Sarcophyton</i> sp.                         | <i>E. coli</i> , <i>B. megaterium</i> , <i>M. violaceum</i> , <i>S. tritici</i>  | D = 5.0, 4.0, 8.5, 7.0 mm        | [146] |

|                                                                   |                                    |                                                                                                                       |                                                               |       |
|-------------------------------------------------------------------|------------------------------------|-----------------------------------------------------------------------------------------------------------------------|---------------------------------------------------------------|-------|
| Gorgostane-3 $\beta$ ,5 $\alpha$ ,6 $\beta$ ,11 $\alpha$ -tetraol | <i>Sarcophyton</i> sp.             | <i>E. coli</i> , <i>B. megaterium</i> , <i>M. violaceum</i> , <i>S. tritici</i>                                       | D = 10, 6.5, 11.5, 7.5 mm                                     | [146] |
| 1-(11'-hydroxymethyl-hexadecanoyl)-2-pentadecanoyl-3-propanol     | <i>Heteroxenia ghardaensis</i>     | <i>M. luteus</i> , <i>K. pneumonia</i> , <i>C. albicans</i>                                                           | MIC = 64, 125, 125 $\mu$ g/disc                               | [147] |
| Cembrene-C                                                        | <i>Sarcophyton trocheliophorum</i> | <i>S. aureus</i> , <i>Acinetobacter</i> spp., MRSA, <i>A. flavus</i> , <i>C. albicans</i>                             | MIC $\geq$ 13.6, $\geq$ 13.6, $\geq$ 13.6, 0.68, 0.68 $\mu$ M | [117] |
| Palustrol                                                         | <i>Sarcophyton trocheliophorum</i> | <i>S. aureus</i> , <i>Acinetobacter</i> spp., MRSA, <i>A. flavus</i> , <i>C. albicans</i>                             | MIC = 6.6, 6.6, 11.1, $\geq$ 11.1, $\geq$ 11.1 $\mu$ M        | [117] |
| Sarcophine                                                        | <i>Sarcophyton trocheliophorum</i> | <i>S. aureus</i> , <i>Acinetobacter</i> spp., MRSA, <i>A. flavus</i> , <i>C. albicans</i>                             | MIC = 9.4, 9.4, 9.4, $\geq$ 21.3, $\geq$ 21.3 $\mu$ M         | [117] |
| Sarcotrocheliol                                                   | <i>Sarcophyton trocheliophorum</i> | <i>S. aureus</i> , <i>Acinetobacter</i> spp., MRSA, <i>A. flavus</i> , <i>C. albicans</i>                             | MIC = 1.53, 3.06, 3.06, $\geq$ 15.3, $\geq$ 15.3 $\mu$ M      | [117] |
| Sarcotrocheliol acetate                                           | <i>Sarcophyton trocheliophorum</i> | <i>S. aureus</i> , <i>Acinetobacter</i> spp., MRSA, <i>A. flavus</i> , <i>C. albicans</i>                             | MIC = 1.74, 4.34, 4.34, $\geq$ 17.4, $\geq$ 17.4 $\mu$ M      | [117] |
| 10 $\alpha$ -methoxy-4 $\beta$ -hydroxy guaine-6-ene              | <i>Sinularia kavarrattensis</i>    | <i>S. aureus</i>                                                                                                      | MIC = 37.5 $\mu$ g/mL                                         | [148] |
| New sesquiterpene                                                 | <i>Sinularia kavarrattensis</i>    | <i>S. aureus</i>                                                                                                      | MIC = 18.75 $\mu$ g/mL                                        | [148] |
| 1S*,4S*,5S*,10R*-4,10-guaianediol                                 | <i>Sinularia kavarrattensis</i>    | <i>S. epidermidis</i>                                                                                                 | MIC = 18.75 $\mu$ g/mL                                        | [148] |
| Subergosterone B                                                  | <i>Subergorgia rubra</i>           | <i>B. cereus</i>                                                                                                      | MIC = 1.56 $\mu$ M                                            | [149] |
| Subergosterone C                                                  | <i>Subergorgia rubra</i>           | <i>B. cereus</i>                                                                                                      | MIC = 1.56 $\mu$ M                                            | [149] |
| Gersemiol A                                                       | <i>Gersemia fruticosa</i>          | MRSA                                                                                                                  | 50% inhibition at 48 $\mu$ g/mL                               | [150] |
| Eunicellol A                                                      | <i>Gersemia fruticosa</i>          | MRSA                                                                                                                  | MIC <sub>90</sub> = 24–48 $\mu$ g/mL                          | [150] |
| Capgermacrene D                                                   | <i>Capnella imbricata</i>          | <i>S. aureus</i> and MRSA                                                                                             | MIC = 200 $\mu$ g/mL                                          | [151] |
| Capgermacrene E                                                   | <i>Capnella imbricata</i>          | <i>S. aureus</i> and MRSA                                                                                             | MIC = 180, 240 $\mu$ g/mL                                     | [151] |
| Capgermacrene F                                                   | <i>Capnella imbricata</i>          | <i>S. aureus</i> and MRSA                                                                                             | MIC = 150 and 125 $\mu$ g/mL                                  | [151] |
| Capgermacrene G                                                   | <i>Capnella imbricata</i>          | <i>S. aureus</i> and MRSA                                                                                             | MIC = 125 and 175 $\mu$ g/mL                                  | [151] |
| Stearic acid                                                      | <i>Lobophytum pauciflorum</i>      | <i>B. subtilis</i>                                                                                                    | MIC 50 $\mu$ g/mL                                             | [65]  |
| Batilol                                                           | <i>Lobophytum pauciflorum</i>      | <i>B. subtilis</i> , <i>S. lutea</i> and <i>C. albicans</i>                                                           | MIC = 25, 25, 50 $\mu$ g/mL                                   | [65]  |
| Nephtenol                                                         | <i>Lobophytum pauciflorum</i>      | <i>C. albicans</i>                                                                                                    | MIC = 50 $\mu$ g/mL                                           | [65]  |
| Gorgost-5-ene-3 $\beta$ -ol                                       | <i>Lobophytum pauciflorum</i>      | <i>C. albicans</i>                                                                                                    | MIC = 50 $\mu$ g/mL                                           | [65]  |
| Heptadecan-1-ol                                                   | <i>Lobophytum pauciflorum</i>      | <i>P. aeruginosa</i> , <i>S. aureus</i> , <i>B. subtilis</i> , <i>M. pheli</i> , <i>S. lutea</i> , <i>C. albicans</i> | MIC = 50, 50, 50, 25, 50, 50 $\mu$ g/mL                       | [65]  |

|                            |                                    |                                                                                                                                                     |                                 |       |
|----------------------------|------------------------------------|-----------------------------------------------------------------------------------------------------------------------------------------------------|---------------------------------|-------|
| Alismol                    | <i>Lobophytum</i> sp.              | <i>S.aureus</i> , <i>S. epidermis</i> , <i>S. pneumonia</i> , <i>P. aeruginosa</i>                                                                  | MIC = 15-30 µg/mL, D = 12-18 mm | [131] |
| Alismoxide                 | <i>Lobophytum</i> sp.              | <i>S.aureus</i> , <i>S. epidermis</i> , <i>S. pneumonia</i> , <i>P. aeruginosa</i>                                                                  | MIC = 30 µg/mL, D = 11 - 15 mm  | [131] |
| Aristol-9-ene              | <i>Lobophytum</i> sp.              | <i>S.aureus</i> , <i>S. epidermis</i> , <i>S. pneumonia</i> , <i>P. aeruginosa</i>                                                                  | MIC ≥ 30 µg/mL, D = 7 - 10 mm   | [131] |
| Cembrene A                 | <i>Lobophytum</i> sp.              | <i>S.aureus</i> , <i>S. epidermis</i> , <i>S. pneumonia</i> , <i>P. aeruginosa</i>                                                                  | MIC = 30 µg/mL, D = 11 - 15 mm  | [131] |
| Chalinasterol              | <i>Lobophytum</i> sp.              | <i>S.aureus</i> , <i>S. epidermis</i> , <i>S. pneumonia</i> , <i>P. aeruginosa</i>                                                                  | MIC ≥ 30 µg/mL, D = 7 - 10 mm   | [131] |
| Nardol                     | <i>Lobophytum</i> sp.              | <i>S.aureus</i> , <i>S. epidermis</i> , <i>S. pneumonia</i> , <i>P. aeruginosa</i>                                                                  | MIC ≥ 30 µg/mL, D = 7 - 9 mm    | [131] |
| Nephalsterol C             | <i>Lobophytum</i> sp.              | <i>S.aureus</i> , <i>S. epidermis</i> , <i>S. pneumonia</i> , <i>P. aeruginosa</i>                                                                  | MIC = 30 µg/mL, D = 7 - 9 mm    | [131] |
| Sarcotrocheldiol A         | <i>Sarcophyton trocheliophorum</i> | <i>K. pneumonia</i> , <i>S. aureus</i> , <i>S. epidermidis</i>                                                                                      | D = 2 - 8 mm                    | [152] |
| Sarcotrocheldiol B         | <i>Sarcophyton trocheliophorum</i> | <i>A. baumannii</i> , <i>E. coli</i> , <i>K. pneumonia</i> , <i>P. aeruginosa</i>                                                                   | D = 6 - 11 mm                   | [152] |
| Trocheliene                | <i>Sarcophyton trocheliophorum</i> | <i>A. baumannii</i> , <i>E. coli</i> , <i>K. pneumonia</i> , <i>P. aeruginosa</i> , <i>S. aureus</i> , <i>S. epidermidis</i> , <i>S. pneumoniae</i> | MIC = 4 - 6 µM, D = 12-18 mm    | [152] |
| Casbane-type diterpenoid 1 | <i>Lobophytum</i> sp.              | <i>S. aureus</i> , <i>E. coli</i>                                                                                                                   | D = 10 mm                       | [61]  |
| Cembrane diterpenoids 2    | <i>Lobophytum</i> sp.              | <i>S. aureus</i> , <i>S. enterica</i> , <i>E. coli</i>                                                                                              | D = 9 - 12 mm                   | [61]  |
| Cembrane diterpenoids 3    | <i>Lobophytum</i> sp.              | <i>S. aureus</i> , <i>S. enterica</i> , <i>E. coli</i>                                                                                              | D = 9 - 10 mm                   | [61]  |
| Nephtthenol                | <i>Nephthea</i> sp.                | <i>L. thermophilum</i>                                                                                                                              | MIC = 12.5 µg/mL                | [153] |
| Nephthecrassocolide A      | <i>Nephthea</i> sp.                | <i>L. thermophilum</i>                                                                                                                              | MIC = 12.5 µg/mL                | [153] |

Supplementary table S4. Antiviral compounds from coral

| Compound                                                                                          | Coral species                 | Target virus                 | Activity value                    | Ref.  |
|---------------------------------------------------------------------------------------------------|-------------------------------|------------------------------|-----------------------------------|-------|
| (+)-12-ethoxycarbonyl-11Z-sarcophine                                                              | <i>Sarcophyton ehrenbergi</i> | Human cytomegalovirus (HCMV) | IC <sub>50</sub> = 60 µg/mL       | [95]  |
| Ehrenbergol A                                                                                     | <i>Sarcophyton ehrenbergi</i> | HCMV                         | IC <sub>50</sub> = 46 µg/mL       | [95]  |
| Ehrenbergol B                                                                                     | <i>Sarcophyton ehrenbergi</i> | HCMV                         | IC <sub>50</sub> = 5.0 µg/mL      | [95]  |
| (24R)-gorgost-25-en-3β,5α,6β,11α-tetraol                                                          | <i>Sarcophyton</i> sp.        | H1N1 (Influenza A virus)     | IC <sub>50</sub> = 19.6 µg/mL     | [105] |
| (24S)-ergost-3β,5α,6β,11α-tetraol                                                                 | <i>Sarcophyton</i> sp.        | H1N1 (Influenza A virus)     | IC <sub>50</sub> = 36.7 µg/mL     | [105] |
| Sinuleptolide                                                                                     | <i>Sinularia nanolobata</i>   | HCMV                         | ED <sub>50</sub> = 1.92 µg/mL     | [111] |
| Ehrenbergol C                                                                                     | <i>Sarcophyton ehrenbergi</i> | HCMV                         | EC <sub>50</sub> = 20 µg/mL       | [154] |
| Acetyl ehrenberoxide B                                                                            | <i>Sarcophyton ehrenbergi</i> | HCMV                         | EC <sub>50</sub> = 8.0 µg/mL      | [154] |
| Alismol                                                                                           | <i>Litophyton arboretum</i>   | HIV-1 PR enzymes             | IC <sub>50</sub> = 7.20 ± 0.7 µM  | [107] |
| 7β-acetoxy-24-methylcholesta-5-24(28)-diene-3,19-diol                                             | <i>Litophyton arboretum</i>   | HIV-1 PR enzymes             | IC <sub>50</sub> = 4.85 ± 0.18 µM | [107] |
| Erythro- <i>N</i> -dodecanoyl-docosasphinga-(4 <i>E</i> ,8 <i>E</i> )-dienine                     | <i>Litophyton arboretum</i>   | HIV-1 PR enzymes             | IC <sub>50</sub> = 4.80 ± 0.92 µM | [107] |
| Secocrassumol                                                                                     | <i>Lobophytum crissum</i>     | HCMV                         | IC <sub>50</sub> = 5.0 µg/mL      | [155] |
| (+)-2- <i>epi</i> -12-methoxycarbonyl-11 <i>E</i> -sarcophine                                     | <i>Sarcophyton ehrenbergi</i> | HCMV                         | IC <sub>50</sub> = 25.0 µg/mL     | [129] |
| (4 <i>S</i> *,5 <i>S</i> *)-4-hydroxy-5-(hydroxymethyl)-2,3-dimethyl-4-pentylcyclopent-2-en-1-one | <i>Sinularia verruca</i>      | HIV-1 virus                  | EC <sub>50</sub> = 34 µM          | [68]  |
| ( <i>S</i> )-4-hydroxy-5-methylene-2,3-dimethyl-4-pentylcyclopent-2-en-1-one                      | <i>Sinularia verruca</i>      | HIV-1 virus                  | EC <sub>50</sub> = 5.8 µM         | [68]  |
| (4 <i>S</i> *,5 <i>S</i> *)-4-hydroxy-5-(ethoxymethyl)-2,3-dimethyl-4-pentylcyclopent-2-en-1-one  | <i>Sinularia verruca</i>      | HIV-1 virus                  | EC <sub>50</sub> = 30 µM          | [68]  |
| Subergorgol T                                                                                     | <i>Subergorgia suberosa</i>   | A/WSN/33 (H1N1)              | IC <sub>50</sub> = 35.64 µM       | [156] |
| Subergorgol U                                                                                     | <i>Subergorgia suberosa</i>   | A/WSN/33 (H1N1)              | IC <sub>50</sub> = 37.73 µM       | [156] |
| (10)-trien-20-one                                                                                 | <i>Subergorgia suberosa</i>   | A/WSN/33 (H1N1)              | IC <sub>50</sub> = 50.95 µM       | [156] |
| 1,2-dehydroprogesterone                                                                           | <i>Subergorgia suberosa</i>   | A/WSN/33 (H1N1)              | IC <sub>50</sub> = 41.6 µM        | [156] |

Supplementary table S5. Antifouling compounds from coral

| Compound                                                                                                                                     | Coral species               | Fouling organisms                                                                              | Activity value                           | Ref.  |
|----------------------------------------------------------------------------------------------------------------------------------------------|-----------------------------|------------------------------------------------------------------------------------------------|------------------------------------------|-------|
| Sinularone A                                                                                                                                 | <i>Sinularia</i> sp.        | Larvae of the barnacle <i>Balanus amphitrite</i>                                               | EC <sub>50</sub> = 13.86 µg/mL           | [90]  |
| Sinularone B                                                                                                                                 | <i>Sinularia</i> sp.        | Larvae of the barnacle <i>Balanus amphitrite</i>                                               | EC <sub>50</sub> = 23.50 µg/mL           | [90]  |
| Sinularone G                                                                                                                                 | <i>Sinularia</i> sp.        | Larvae of the barnacle <i>Balanus amphitrite</i>                                               | EC <sub>50</sub> = 18.65 µg/mL           | [90]  |
| Sinularone H                                                                                                                                 | <i>Sinularia</i> sp.        | Larvae of the barnacle <i>Balanus amphitrite</i>                                               | EC <sub>50</sub> = 21.39 µg/mL           | [90]  |
| Sinularone I                                                                                                                                 | <i>Sinularia</i> sp.        | Larvae of the barnacle <i>Balanus amphitrite</i>                                               | EC <sub>50</sub> = 12.58 µg/mL           | [90]  |
| Butenolide                                                                                                                                   | <i>Sinularia</i> sp.        | Larvae of the barnacle <i>Balanus amphitrite</i>                                               | EC <sub>50</sub> = 3.84 µg/mL            | [90]  |
| Capillosanane I                                                                                                                              | <i>Sinularia capillosa</i>  | The barnacle <i>Balanus amphitrite</i>                                                         | IC <sub>50</sub> = 5.40 µM               | [27]  |
| Capillosanane A                                                                                                                              | <i>Sinularia capillosa</i>  | The barnacle <i>Balanus amphitrite</i>                                                         | IC <sub>50</sub> = 9.70 µM               | [27]  |
| Sinulariol Z                                                                                                                                 | <i>Sinularia rigida</i>     | The barnacle <i>Balanus amphitrite</i> and <i>Bugula neritina</i>                              | EC <sub>50</sub> = 4.57 and 13.48 µg/mL  | [157] |
| (2 <i>E</i> ,7 <i>E</i> )-4,11-dihydroxy-1,12-oxidocebra-2,7-diene                                                                           | <i>Sinularia rigida</i>     | The barnacle <i>Balanus amphitrite</i> and <i>Bugula neritina</i>                              | EC <sub>50</sub> = 4.86 and 12.34 µg/mL  | [157] |
| Nepthoacetal                                                                                                                                 | <i>Nephtea</i> sp.          | The larvae <i>Bugula neritina</i>                                                              | EC <sub>50</sub> = 2.5 µg/mL             | [104] |
| 16,22-epoxy-20β,23 <i>S</i> -dihydroxycholest-1-ene-3-one                                                                                    | <i>Subergorgia suberosa</i> | Larvae of the barnacle <i>Balanus amphitrite</i>                                               | EC <sub>50</sub> = 5.3 µg/mL             | [158] |
| (1 <i>R</i> ,13 <i>S</i> ,12 <i>S</i> ,9 <i>S</i> ,8 <i>R</i> ,5 <i>S</i> ,4 <i>R</i> )-9-acetoxy-5,8:12,13-diepoxycebr-15(17)-en-16,4-olide | <i>Sinularia flexibilis</i> | The larvae of the barnacle <i>Balanus albicostatus</i>                                         | EC <sub>50</sub> = 20.34 µg/mL           | [159] |
| 11-dehydrosinulariolide                                                                                                                      | <i>Sinularia flexibilis</i> | The larvae of the bryozoan <i>Bugula neritina</i>                                              | EC <sub>50</sub> = 21.02 µg/mL           | [159] |
| Dihydrosinularin                                                                                                                             | <i>Sinularia flexibilis</i> | The larvae of the bryozoan <i>Bugula neritina</i>                                              | EC <sub>50</sub> = 55.60 µg/mL           | [159] |
| (-)-14-deoxycrassin                                                                                                                          | <i>Sinularia flexibilis</i> | The larvae of the bryozoan <i>Bugula neritina</i> and the barnacle <i>Balanus albicostatus</i> | EC <sub>50</sub> = 3.90 and 21.26 µg/mL  | [159] |
| Epoxycebrane A                                                                                                                               | <i>Sinularia flexibilis</i> | The larvae of the bryozoan <i>Bugula neritina</i> and the barnacle <i>Balanus albicostatus</i> | EC <sub>50</sub> = 21.37 and 30.60 µg/mL | [159] |
| Sinulariolide                                                                                                                                | <i>Sinularia flexibilis</i> | The larvae of the bryozoan <i>Bugula neritina</i> and the barnacle <i>Balanus albicostatus</i> | EC <sub>50</sub> = 33.18 and 21.00 µg/mL | [159] |

Supplementary table S6. Other bioactive compounds from coral

| Compound                                                                  | Coral species                      | Activity type                    | Activity value                   | Ref   |
|---------------------------------------------------------------------------|------------------------------------|----------------------------------|----------------------------------|-------|
| Crassumolide E                                                            | <i>Lobophytum</i> sp.              | Acetylcholinesterase inhibitory  | At least 1 µg as AChE inhibitor  | [160] |
| (22 <i>S</i> ,24 <i>S</i> )-24-methyl-22,25-epoxyfurost-5-ene-3β,20β-diol | <i>Lobophytum laevigatum</i>       | PPARs transcriptional activity   | 2.0-fold activation at 10 µM     | [87]  |
| (24 <i>S</i> )-ergost-5-ene-3β,7α-diol                                    | <i>Lobophytum laevigatum</i>       | PPARs transcriptional activity   | 2.5-fold activation 10 µM        | [87]  |
| Pregnenolone                                                              | <i>Lobophytum laevigatum</i>       | PPARs transcriptional activity   | 2.1-fold activation 10 µM        | [87]  |
| Ethyl acetate fraction                                                    | <i>Lobophytum</i> sp.              | Heme polymerization inhibitory   | IC <sub>50</sub> = 11.7 µg/mL    | [161] |
| <i>n</i> -butanol fraction                                                | <i>Lobophytum</i> sp.              | Heme polymerization inhibitory   | IC <sub>50</sub> = 14.3 µg/mL    | [161] |
| Aqueous fraction                                                          | <i>Lobophytum</i> sp.              | Heme polymerization inhibitory   | IC <sub>50</sub> = 12.0 µg/mL    | [161] |
| (3β,4α,5α,8β)-4-methylergost-24(28)-ene-3,8-diol                          | <i>Sinularia depressa</i>          | PTP1B inhibitory                 | IC <sub>50</sub> = 22.7 µM       | [143] |
| (3β,4α,5α)-4-methylergost-24(28)-ene-3-ol                                 | <i>Sinularia depressa</i>          | PTP1B inhibitory                 | IC <sub>50</sub> = 19.5 µM       | [143] |
| Ergost-4,24(28)-diene-3-one                                               | <i>Sinularia depressa</i>          | PTP1B inhibitory                 | IC <sub>50</sub> = 15.3 µM       | [143] |
| Sarsolilide A                                                             | <i>Sarcophyton trocheliophorum</i> | PTP1B inhibitory                 | IC <sub>50</sub> = 6.8 ± 0.96 µM | [162] |
| Sarsolilide B                                                             | <i>Sarcophyton trocheliophorum</i> | PTP1B inhibitory                 | IC <sub>50</sub> = 27.1 ± 2.6 µM | [162] |
| An unnamed prenyleudesmane diterpene                                      | <i>Sinularia polydactyla</i>       | PTP1B inhibitory                 | IC <sub>50</sub> = 75.5 µM       | [163] |
| Sinupol                                                                   | <i>Sinularia polydactyla</i>       | PTP1B inhibitory                 | IC <sub>50</sub> = 63.9 µM       | [163] |
| Sinulacetate                                                              | <i>Sinularia polydactyla</i>       | PTP1B inhibitory                 | IC <sub>50</sub> = 51.8 µM       | [163] |
| Montiporic acid D                                                         | <i>Montipora digitata</i>          | DPPH radical scavenging activity | 35% inhibition at 1 mg/mL        | [164] |
| ( <i>Z</i> )-13,15-hexadecadien-2,4-diyne-1-ol                            | <i>Montipora digitata</i>          | DPPH radical scavenging activity | 25% inhibition at 1 mg/mL        | [164] |
| <i>n</i> -butanol fraction                                                | <i>Lobophytum</i> sp.              | DPPH radical scavenging activity | IC <sub>50</sub> = 150 µg/mL     | [161] |

**Supplementary table S7.** Anti-inflammatory and cytotoxic compounds from coral-associated microorganisms

| Compound                            | Coral species                | Microorganisms             | Target cell lines/ anti-inflammatory type | Activity value                                                 | Ref.  |
|-------------------------------------|------------------------------|----------------------------|-------------------------------------------|----------------------------------------------------------------|-------|
| Versicolactone B                    | <i>Lobophytum michaelae</i>  | <i>Aspergillus terreus</i> | Inhibition of NO production               | Nearly 60% inhibition at 20 mM                                 | [165] |
| 3'-isoamylene butyrolactone IV      | <i>Lobophytum michaelae</i>  | <i>Aspergillus terreus</i> | Inhibition of NO production               | Nearly 25.1% inhibition at 20 mM                               | [165] |
| Butyrolactone I                     | <i>Lobophytum michaelae</i>  | <i>Aspergillus terreus</i> | Inhibition of NO production               | Nearly 25.3% inhibition at 20 mM                               | [165] |
| Altersolanol C                      | <i>Sarcophyton</i> sp.       | <i>Alternaria</i> sp.      | HCT-116, MCF-7/ADR, PC-3, HepG2 and Hep3B | IC <sub>50</sub> = 2.2, 3.2, 7.6, 8.9, 8.2 μM                  | [166] |
| Alterporriol P                      | <i>Sarcophyton</i> sp.       | <i>Alternaria</i> sp.      | HCT-116, MCF-7/ADR, PC-3, HepG2 and Hep3B | IC <sub>50</sub> = 8.6, 23, 6.4, 20, 21 μM                     | [166] |
| Alterporriol C                      | <i>Sarcophyton</i> sp.       | <i>Alternaria</i> sp.      | HCT-116, MCF-7/ADR, PC-3, HepG2 and Hep3B | IC <sub>50</sub> = 24, 98, 27, 53, 51 μM                       | [166] |
| Chondrosterin A                     | <i>Sarcophyton tortuosum</i> | <i>Chondrostereum</i> sp.  | A549, CNE2, LoVo                          | IC <sub>50</sub> = 2.45, 4.95, 5.47 μM                         | [167] |
| Strepchloritide A                   | Unidentified Coral           | <i>Streptomyces</i> sp.    | MCF-7                                     | IC <sub>50</sub> = 9.9 μmol/L                                  | [168] |
| Strepchloritide B                   | Unidentified Coral           | <i>Streptomyces</i> sp.    | MCF-7                                     | IC <sub>50</sub> = 20.2 μmol/L                                 | [168] |
| Aspetritone A                       | <i>Galaxea fascicularis</i>  | <i>Aspergillus tritici</i> | HeLa, A549, HepG2                         | IC <sub>50</sub> = 2.67 ± 0.60, 3.13 ± 0.68, 3.87 ± 0.74 μM    | [169] |
| 3-prenylterphenyllin                | <i>Galaxea fascicularis</i>  | <i>Aspergillus tritici</i> | HeLa, A549, HepG2                         | IC <sub>50</sub> = 3.23 ± 0.40, 3.87 ± 0.15, 2.10 ± 0.20 μM    | [169] |
| Aspetritone B                       | <i>Galaxea fascicularis</i>  | <i>Aspergillus tritici</i> | HeLa, A549, HepG2                         | IC <sub>50</sub> = 10.57 ± 0.93, 4.67 ± 0.60, 8.57 ± 0.83 μM   | [169] |
| 3,4-dimethyl-3''-prenylcandidusin A | <i>Galaxea fascicularis</i>  | <i>Aspergillus tritici</i> | HeLa, A549, HepG2                         | IC <sub>50</sub> = 16.77 ± 0.45, 21.07 ± 0.76, 27.17 ± 0.29 μM | [169] |
| 4-methyl-3''-prenylcandidusin A     | <i>Galaxea fascicularis</i>  | <i>Aspergillus tritici</i> | HeLa, A549, HepG2                         | IC <sub>50</sub> = 10.20 ± 0.50, 13.07 ± 0.72, 35.10 ± 1.00 μM | [169] |
| Candidusin A                        | <i>Galaxea fascicularis</i>  | <i>Aspergillus tritici</i> | HeLa, A549, HepG2                         | IC <sub>50</sub> = 25.07 ± 0.81, 19.07 ± 0.64, 32.10 ± 2.00 μM | [169] |
| Terphenyllin                        | <i>Galaxea fascicularis</i>  | <i>Aspergillus tritici</i> | HeLa, A549, HepG2                         | IC <sub>50</sub> = 18.87 ± 1.27, 12.33 ± 0.68, 21.2 ± 0.35 μM  | [169] |
| 3-hydroxyterphenyllin               | <i>Galaxea fascicularis</i>  | <i>Aspergillus tritici</i> | HeLa, A549, HepG2                         | IC <sub>50</sub> = 23.37 ± 0.84, 36.07 ± 1.67, 32.10 ± 2.65 μM | [169] |
| 3-hydroxy-4''-deoxyterphenyllin     | <i>Galaxea fascicularis</i>  | <i>Aspergillus tritici</i> | HepG2                                     | IC <sub>50</sub> = 45.20 ± 1.00 μM                             | [169] |

|                                                          |                             |                            |                   |                                                                |       |
|----------------------------------------------------------|-----------------------------|----------------------------|-------------------|----------------------------------------------------------------|-------|
| 3'-prenylterphenyllin                                    | <i>Galaxea fascicularis</i> | <i>Aspergillus tritici</i> | HeLa, HepG2       | IC <sub>50</sub> = 38.30 ± 1.50, 40.10 ± 0.90 μM               | [169] |
| Emodin                                                   | <i>Galaxea fascicularis</i> | <i>Aspergillus tritici</i> | HeLa, A549, HepG2 | IC <sub>50</sub> = 25.07 ± 0.81, 22.17 ± 1.45, 30.20 ± 0.87 μM | [169] |
| 3-hydroxy-2-hydroxymethyl-1-methoxyanthracene-9,10-dione | <i>Galaxea fascicularis</i> | <i>Aspergillus tritici</i> | A549              | IC <sub>50</sub> = 45.63 ± 1.79 μM                             | [169] |
| 1,2,3-trimethoxy-7-hydroxymethylanthracene-9,10-dione    | <i>Galaxea fascicularis</i> | <i>Aspergillus tritici</i> | HepG2             | IC <sub>50</sub> = 42.07 ± 1.07 μM                             | [169] |

Supplementary table S8. Antimicrobial compounds from coral-associated microorganisms

| Compound                            | Coral species                 | Microorganisms            | Reference microorganisms                                                                                     | Activity value                                                                                            | Ref.  |
|-------------------------------------|-------------------------------|---------------------------|--------------------------------------------------------------------------------------------------------------|-----------------------------------------------------------------------------------------------------------|-------|
| Cottoquinazoline D                  | <i>Cladiella</i> sp.          | <i>A. versicolor</i>      | <i>C. albicans</i>                                                                                           | MIC = 22.6 $\mu$ M                                                                                        | [170] |
| Watasemycin A                       | Unidentified Coral            | <i>Streptomyces</i> sp.   | <i>S. aureus</i> , methicillin-resistant <i>S. aureus</i> (MRSA082, MRSA111, MRSA234)                        | MIC = 1.95 $\mu$ g/mL, 7.81, 7.81, 7.81 $\mu$ g/mL                                                        | [168] |
| Aerugine                            | Unidentified Coral            | <i>Streptomyces</i> sp.   | <i>S. aureus</i> , methicillin-resistant <i>S. aureus</i> (MRSA082, MRSA111, MRSA234)                        | MIC = 1.95 $\mu$ g/mL, 7.81, 7.81, 7.81 $\mu$ g/mL                                                        | [168] |
| ( $\pm$ )-pestalachloride D         | <i>Sarcophyton</i> sp.        | <i>Pestalotiopsis</i> sp. | <i>E. coli</i> , <i>V. anguillarum</i> , <i>V. parahaemolyticus</i>                                          | MIC = 5.0, 10.0, 20.0 $\mu$ M                                                                             | [171] |
| ( $\pm$ )-pestalachloride C         | <i>Sarcophyton</i> sp.        | <i>Pestalotiopsis</i> sp. | <i>E. coli</i> , <i>V. anguillarum</i> , <i>V. parahaemolyticus</i>                                          | MIC = 5.0, 10.0, 20.0 $\mu$ M                                                                             | [171] |
| Secalonic acid D                    | <i>Dichotella gemmacea</i>    | <i>Penicillium</i> sp.    | <i>B. subtilis</i> , <i>E. coli</i> , <i>M. luteus</i> , <i>P. nigrifaciens</i>                              | MIC = 22.4, 22.4, 24.4, 97.5 $\mu$ g/mL                                                                   | [172] |
| Secalonic acid B                    | <i>Dichotella gemmacea</i>    | <i>Penicillium</i> sp.    | <i>B. subtilis</i> , <i>E. coli</i> , <i>M. luteus</i> , <i>P. nigrifaciens</i>                              | MIC = 97.5, 97.5, 97.5, 390.5 $\mu$ g/mL                                                                  | [172] |
| Penicillixanthone A                 | <i>Dichotella gemmacea</i>    | <i>Penicillium</i> sp.    | <i>B. subtilis</i> , <i>E. coli</i> , <i>M. luteus</i> , <i>P. nigrifaciens</i>                              | MIC = 24.4, 24.4, 24.4, 97.5 $\mu$ g/mL                                                                   | [172] |
| 4'-OMe-asperphenamate               | <i>Sarcophyton</i> sp.        | <i>A. elegans</i>         | <i>S. epidermidis</i>                                                                                        | MIC = 10 $\mu$ M                                                                                          | [173] |
| Asperphenamate                      | <i>Sarcophyton</i> sp.        | <i>A. elegans</i>         | <i>S. epidermidis</i>                                                                                        | MIC = 10 $\mu$ M                                                                                          | [173] |
| Cytochalasin I                      | <i>Sarcophyton</i> sp.        | <i>A. elegans</i>         | <i>S. epidermidis</i> and <i>S. aureus</i>                                                                   | MIC = 20, 10 $\mu$ M                                                                                      | [173] |
| Cytochalasin D                      | <i>Sarcophyton</i> sp.        | <i>A. elegans</i>         | <i>S. epidermidis</i> , <i>S. aureus</i> , <i>E. coli</i> and <i>B. cereus</i>                               | MIC = 10 $\mu$ M                                                                                          | [173] |
| Aspergillin PZ                      | <i>Sarcophyton</i> sp.        | <i>A. elegans</i>         | <i>S. epidermidis</i>                                                                                        | MIC = 20 $\mu$ M                                                                                          | [173] |
| 6-deoxyaflaquinolone E              | <i>Carijoa</i> sp.            | <i>Scopulariopsis</i> sp. | <i>S. aureus</i> , <i>B. cereus</i> , <i>V. parahaemolyticus</i> , <i>N. brasiliensis</i> , <i>P. putida</i> | MIC = 0.78, 1.56, 6.25, 0.78, 1.56 $\mu$ M                                                                | [174] |
| Tropodithietic acid                 | <i>Pocillopora damicornis</i> | <i>Pseudovibrio</i> sp.   | <i>V. coralliilyticus</i> and <i>V. owensii</i> .                                                            | D = 2 $\pm$ 0.09 and 5 $\pm$ 0.07 mm                                                                      | [175] |
| 3, 9-deoxy-7-methoxybostrycin       | <i>Galaxea fascicularis</i>   | <i>A. tritici</i>         | <i>S. aureus</i> (MRSA) (ATCC 43300, CGMCC 1.12409)                                                          | MIC = 7.53 $\pm$ 0.31, 7.63 $\pm$ 0.21 $\mu$ g/mL                                                         | [169] |
| 4-methyl-3''-prenylcandidusin A     | <i>Galaxea fascicularis</i>   | <i>A. tritici</i>         | MRSA ATCC 43300, MRSA CGMCC 1.12409, <i>V. vulnificus</i> , <i>V. rotiferianus</i> , <i>V. campbellii</i>    | MIC = 3.80 $\pm$ 0.13, 3.80 $\pm$ 0.22, 7.77 $\pm$ 0.10, 7.75 $\pm$ 0.18, 15.57 $\pm$ 0.30 $\mu$ g/mL     | [169] |
| 4-methyl-candidusin A               | <i>Galaxea fascicularis</i>   | <i>A. tritici</i>         | MRSA ATCC 43300, MRSA CGMCC 1.12409, <i>V. vulnificus</i> , <i>V. campbellii</i>                             | MIC = 31.33 $\pm$ 0.61, 30.97 $\pm$ 0.78, 31.47 $\pm$ 1.22, 15.10 $\pm$ 0.44 $\mu$ g/mL                   | [169] |
| Aspetritone B                       | <i>Galaxea fascicularis</i>   | <i>A. tritici</i>         | MRSA ATCC 43300, MRSA CGMCC 1.12409, <i>V. vulnificus</i> , <i>V. rotiferianus</i> , <i>V. campbellii</i>    | MIC = 15.27 $\pm$ 0.35, 15.63 $\pm$ 0.45, 15.47 $\pm$ 0.51, 31.33 $\pm$ 0.23, 15.77 $\pm$ 0.29 $\mu$ g/mL | [169] |
| 3,4-dimethyl-3''-prenylcandidusin A | <i>Galaxea fascicularis</i>   | <i>A. tritici</i>         | MRSA ATCC 43300, MRSA CGMCC 1.12409, <i>V. vulnificus</i> , <i>V. rotiferianus</i>                           | MIC = 15.67 $\pm$ 0.50, 7.57 $\pm$ 0.73, 15.58 $\pm$ 0.33, 15.57 $\pm$ 0.30 $\mu$ g/mL                    | [169] |

|                                                          |                             |                              |                                                                                                           |                                                                                  |       |
|----------------------------------------------------------|-----------------------------|------------------------------|-----------------------------------------------------------------------------------------------------------|----------------------------------------------------------------------------------|-------|
| Candidusin A                                             | <i>Galaxea fascicularis</i> | <i>A. tritici</i>            | MRSA ATCC 43300, MRSA CGMCC 1.12409, <i>V. vulnificus</i> , <i>V. rotiferianus</i>                        | MIC = 31.47 ± 0.24, 31.23 ± 0.10, 31.42 ± 0.23, 31.33 ± 0.19 µg/mL               | [169] |
| 4"-deoxyterphenyllin                                     | <i>Galaxea fascicularis</i> | <i>A. tritici</i>            | MRSA ATCC 43300, MRSA CGMCC 1.12409, <i>V. vulnificus</i> , <i>V. rotiferianus</i> , <i>V. campbellii</i> | MIC = 31.30 ± 0.26, 31.45 ± 0.22, 31.37 ± 0.14, 31.53 ± 0.31, 31.47 ± 0.25 µg/mL | [169] |
| 3-prenylterphenyllin                                     | <i>Galaxea fascicularis</i> | <i>A. tritici</i>            | MRSA ATCC 43300, MRSA CGMCC 1.12409, <i>V. vulnificus</i> , <i>V. rotiferianus</i>                        | MIC = 15.53 ± 0.31, 15.47 ± 0.23, 31.43 ± 0.32, 31.37 ± 0.21 µg/mL               | [169] |
| Terphenyllin                                             | <i>Galaxea fascicularis</i> | <i>A. tritici</i>            | MRSA ATCC 43300, MRSA CGMCC 1.12409, <i>V. vulnificus</i>                                                 | MIC = 31.47 ± 0.24, 31.27 ± 0.16, 31.27 ± 0.25 µg/mL                             | [169] |
| 3-hydroxyterphenyllin                                    | <i>Galaxea fascicularis</i> | <i>A. tritici</i>            | MRSA ATCC 43300, MRSA CGMCC 1.12409, <i>V. vulnificus</i> , <i>V. rotiferianus</i> , <i>V. campbellii</i> | MIC = 31.30 ± 0.17, 31.33 ± 0.12, 31.43 ± 0.21 µg/mL                             | [169] |
| 3"-prenylterphenyllin                                    | <i>Galaxea fascicularis</i> | <i>A. tritici</i>            | MRSA ATCC 43300, MRSA CGMCC 1.12409, <i>V. vulnificus</i> , <i>V. campbellii</i>                          | MIC = 31.33 ± 0.23, 31.28 ± 0.10, 31.25 ± 0.13, 31.43 ± 0.20 µg/mL               | [169] |
| Emodin                                                   | <i>Galaxea fascicularis</i> | <i>A. tritici</i>            | MRSA ATCC 43300, MRSA CGMCC 1.12409, <i>V. vulnificus</i> , <i>V. rotiferianus</i> , <i>V. campbellii</i> | MIC = 15.65 ± 0.18, 15.53 ± 0.12, 15.73 ± 0.12, 62.67 ± 0.15, 31.35 ± 0.22 µg/mL | [169] |
| 3-hydroxy- 1,2,5,6-tetramethoxyanthracene-9,10-dione     | <i>Galaxea fascicularis</i> | <i>A. tritici</i>            | MRSA ATCC 43300, MRSA CGMCC 1.12409                                                                       | MIC = 31.32 ± 0.25, 31.33 ± 0.23 µg/mL                                           | [169] |
| 3-hydroxy-2-hydroxymethyl-1-methoxyanthracene-9,10-dione | <i>Galaxea fascicularis</i> | <i>A. tritici</i>            | <i>V. rotiferianus</i>                                                                                    | MIC = 31.28 ± 0.14 µg/mL                                                         | [169] |
| Lobophorin K                                             | <i>Lophelia pertusa</i>     | <i>Streptomyces</i> sp.      | <i>S. aureus</i>                                                                                          | MIC <sub>90</sub> = 40 - 80 µg/mL                                                | [176] |
| Cell-free supernatant                                    | <i>Platygyra</i> sp.        | <i>Pseudoalteromonas</i> sp. | <i>B. cereus</i> , <i>S. aureus</i>                                                                       | Survival rate: 15 - 46 % and 34 - 69 %                                           | [177] |
| Agar containing bacteria                                 | <i>Antipathes dichotoma</i> | <i>B. aquimaris</i>          | <i>M. luteus</i> , <i>P. piscida</i>                                                                      | D = 8.06 ± 0.71, 11.28 ± 0.72 mm                                                 | [178] |
| Agar containing bacteria                                 | <i>Antipathes dichotoma</i> | <i>B. flexus</i>             | <i>M. luteus</i> , <i>P. piscida</i>                                                                      | D = 7.07 ± 0.14, 13.09 ± 0.46 mm                                                 | [178] |
| Agar containing bacteria                                 | <i>Antipathes dichotoma</i> | <i>B. altitudinis</i>        | <i>M. luteus</i>                                                                                          | D = 10.28 ± 0.42 mm                                                              | [178] |
| Agar containing bacteria                                 | <i>Antipathes dichotoma</i> | <i>S. albus</i>              | <i>M. luteus</i>                                                                                          | D = 11.29 ± 0.35 mm                                                              | [178] |
| Agar containing bacteria                                 | <i>Antipathes dichotoma</i> | <i>S. labedae</i>            | <i>M. luteus</i>                                                                                          | D = 12.69 ± 0.44 mm                                                              | [178] |
| Agar containing bacteria                                 | <i>Antipathes dichotoma</i> | <i>P. oxalicum</i>           | <i>M. luteus</i>                                                                                          | D = 8.23 ± 0.21 mm                                                               | [178] |
| Agar containing bacteria                                 | <i>Antipathes dichotoma</i> | <i>B. amyloliquefaciens</i>  | <i>M. luteus</i> , <i>P. piscida</i>                                                                      | D = 8.17 ± 0.32 , 11.23 ± 0.56 mm                                                | [178] |
| Agar containing bacteria                                 | <i>Antipathes dichotoma</i> | <i>P. chrysogenum</i>        | <i>M. luteus</i> , <i>P. piscida</i>                                                                      | D = 9.28 ± 0.28, 11.41 ± 0.77 mm                                                 | [178] |

|                          |                             |                                |                                                        |                                                              |       |
|--------------------------|-----------------------------|--------------------------------|--------------------------------------------------------|--------------------------------------------------------------|-------|
| Agar containing bacteria | <i>Antipathes dichotoma</i> | <i>P. citrinum</i>             | <i>M. luteus, P. piscida</i>                           | D = 8.18 ± 0.61, 14.00 ± 0.70 mm                             | [178] |
| Agar containing bacteria | <i>Antipathes dichotoma</i> | <i>S. equorum</i>              | <i>P. piscida</i>                                      | D = 11.41 ± 0.73 mm                                          | [178] |
| Agar containing bacteria | <i>Antipathes dichotoma</i> | <i>F. proliferatum</i>         | <i>A. versicolor</i>                                   | D = 15.45 ± 0.49 mm                                          | [178] |
| Agar containing bacteria | <i>Antipathes dichotoma</i> | <i>B. subtilis</i>             | <i>A. versicolor, A. sydowii</i>                       | D = 16.95 ± 0.63, 15.23 ± 0.59 mm                            | [178] |
| Agar containing bacteria | <i>Antipathes dichotoma</i> | <i>A. ochraceopetaliformis</i> | <i>A. versicolor, A. sydowii</i>                       | D = 17.15 ± 0.69, 11.62 ± 0.38 mm                            | [178] |
| Agar containing bacteria | <i>Antipathes dichotoma</i> | <i>M. coxensis</i>             | <i>M. luteus, A. versicolor, A. sydowii</i>            | D = 8.03 ± 0.82 , 11.22 ± 0.84, 8.12 ± 0.14 mm               | [178] |
| Agar containing bacteria | <i>Antipathes dichotoma</i> | <i>S. albogriseolus</i>        | <i>M. luteus, P. piscida, A.versicolor, A. sydowii</i> | D = 15.29 ± 0.42, 13.08 ± 0.65, 7.56 ± 0.39, 11.87 ± 0.72 mm | [178] |
| Agar containing bacteria | <i>Antipathes dichotoma</i> | <i>S. xiamenensis</i>          | <i>M. luteus, P. piscida, A.versicolor, A. sydowii</i> | D = 16.25 ± 0.38, 16.94 ± 0.56, 14.33 ± 0.62, 9.13 ± 0.30 mm | [178] |

**Supplementary table S9.** Antiviral compounds from coral-associated microorganisms

| <b>Compound</b>                                                   | <b>Coral species</b> | <b>Microorganisms</b> | <b>Target virus</b> | <b>Activity value</b>                  | <b>Ref.</b> |
|-------------------------------------------------------------------|----------------------|-----------------------|---------------------|----------------------------------------|-------------|
| Tetrahydroaltersolanol C                                          | Sarcophyton sp.      | Alternaria sp.        | PRRSV               | IC <sub>50</sub> = 65 μM               | [166]       |
| Alterporriol Q                                                    | Sarcophyton sp.      | Alternaria sp.        | PRRSV               | IC <sub>50</sub> = 22 μM               | [166]       |
| Alterporriol C                                                    | Sarcophyton sp.      | Alternaria sp.        | PRRSV               | IC <sub>50</sub> = 39 μM               | [166]       |
| Pestalotiolid A                                                   | Sarcophyton sp.      | Pestalotiopsis sp.    | EV71, RSV           | IC <sub>50</sub> = 27.7, 80.9 μM       | [179]       |
| 7-Hydroxy-5-Methoxy-4,6-Dimethyl-7-O-B-D-Glucopyranosyl-Phthalide | Sarcophyton sp.      | Pestalotiopsis sp.    | EV71, RSV, HSV-1    | IC <sub>50</sub> = 51.6, 25.6, 63.9 μM | [179]       |
| 7-hydroxy-5-methoxy-4,6-dimethyl-7-O-A-L-rhamnosyl-phthalide      | Sarcophyton sp.      | Pestalotiopsis sp.    | EV71                | IC <sub>50</sub> = 111 μM              | [179]       |
| 7-hydroxy-5-methoxy-4,6-dimethylphthalide                         | Sarcophyton sp.      | Pestalotiopsis sp.    | RSV                 | IC <sub>50</sub> = 21 μM               | [179]       |
| 5'-O-Acetyl uridine                                               | Sarcophyton sp.      | Pestalotiopsis sp.    | EV71                | IC <sub>50</sub> = 110 μM              | [179]       |

**Supplementary table S10.** Antifouling compounds from coral-associated microorganisms

| Compound                               | Coral species              | Microorganisms             | Fouling organisms                                    | Activity value                | Ref.  |
|----------------------------------------|----------------------------|----------------------------|------------------------------------------------------|-------------------------------|-------|
| Cytochalasin I                         | <i>Sarcophyton</i> sp.     | <i>Aspergillus elegans</i> | The larval of the barnacle <i>Balanus amphitrite</i> | EC <sub>50</sub> = 34 μM      | [173] |
| Cytochalasin J                         | <i>Sarcophyton</i> sp.     | <i>Aspergillus elegans</i> | The larval of the barnacle <i>Balanus amphitrite</i> | EC <sub>50</sub> = 14 μM      | [173] |
| Cytochalasin D                         | <i>Sarcophyton</i> sp.     | <i>Aspergillus elegans</i> | The larval of the barnacle <i>Balanus amphitrite</i> | EC <sub>50</sub> = 6.2 μM     | [173] |
| Cytochalasin H                         | <i>Sarcophyton</i> sp.     | <i>Aspergillus elegans</i> | The larval of the barnacle <i>Balanus amphitrite</i> | EC <sub>50</sub> = 37 μM      | [173] |
| 6,8,5'6'-tetrahydroxy-3'-methylflavone | <i>Dichotella gemmacea</i> | <i>Penicillium</i> sp.     | The larval of the barnacle <i>Balanus amphitrite</i> | EC <sub>50</sub> = 6.7 μg/mL  | [172] |
| Emodin                                 | <i>Dichotella gemmacea</i> | <i>Penicillium</i> sp.     | The larval of the barnacle <i>Balanus amphitrite</i> | EC <sub>50</sub> = 6.1 μg/mL  | [172] |
| Citreorosein                           | <i>Dichotella gemmacea</i> | <i>Penicillium</i> sp.     | The larval of the barnacle <i>Balanus amphitrite</i> | EC <sub>50</sub> = 17.9 μg/mL | [172] |
| Isorhodoptilometrins                   | <i>Dichotella gemmacea</i> | <i>Penicillium</i> sp.     | The larval of the barnacle <i>Balanus amphitrite</i> | EC <sub>50</sub> = 13.7 μg/mL | [172] |
| Aniduquinolone A                       | <i>Carijoa</i> sp.         | <i>Scopulariopsis</i> sp.  | The larval of the barnacle <i>Balanus amphitrite</i> | EC <sub>50</sub> = 17.5 pM    | [174] |
| Aflaquinolone A                        | <i>Carijoa</i> sp.         | <i>Scopulariopsis</i> sp.  | The larval of the barnacle <i>Balanus amphitrite</i> | EC <sub>50</sub> = 28 nM      | [174] |
| Aflaquinolone D                        | <i>Carijoa</i> sp.         | <i>Scopulariopsis</i> sp.  | The larval of the barnacle <i>Balanus amphitrite</i> | EC <sub>50</sub> = 2.8 nM     | [174] |
| 6-deoxyaflaquinolone E                 | <i>Carijoa</i> sp.         | <i>Scopulariopsis</i> sp.  | The larval of the barnacle <i>Balanus amphitrite</i> | EC <sub>50</sub> = 1.04 μM    | [174] |
| Aflaquinolone F                        | <i>Carijoa</i> sp.         | <i>Scopulariopsis</i> sp.  | The larval of the barnacle <i>Balanus amphitrite</i> | EC <sub>50</sub> = 0.86 μM    | [174] |

Supplementary table S11. Other bioactive compounds from coral-associated microorganisms

| Compound                                | Coral species                | Microorganisms                | Activity type                               | Activity value                                  | Ref.  |
|-----------------------------------------|------------------------------|-------------------------------|---------------------------------------------|-------------------------------------------------|-------|
| Alternariol-9-methyl ether-3-O-sulphate | <i>Litophyton arboreum</i>   | <i>Alternaria alternata</i>   | Protease inhibitory activity (HCV NS3-NS4A) | IC <sub>50</sub> = 52.0 µg/mL                   | [180] |
| Alternar-iol-9-methyl ether             | <i>Litophyton arboreum</i>   | <i>Alternaria alternata</i>   | Protease inhibitory activity (HCV NS3-NS4A) | IC <sub>50</sub> = 32.2 µg/mL                   | [180] |
| Alternariol                             | <i>Litophyton arboreum</i>   | <i>Alternaria alternata</i>   | Protease inhibitory activity (HCV NS3-NS4A) | IC <sub>50</sub> = 12.0 µg/mL                   | [180] |
| Ethyl acetate extract                   | <i>Litophyton arboreum</i>   | <i>Alternaria alternata</i>   | Protease inhibitory activity (HCV NS3-NS4A) | IC <sub>50</sub> = 14.0 µg/mL                   | [180] |
| Cladospolide E                          | Unidentified soft coral      | <i>Cladosporium</i> sp.       | Lipid-lowering activity                     | IC <sub>50</sub> = 12.1 µM                      | [181] |
| Secopatulolide A                        | Unidentified soft coral      | <i>Cladosporium</i> sp.       | Lipid-lowering activity                     | IC <sub>50</sub> = 8.4 µM                       | [181] |
| Secopatulolide B                        | Unidentified soft coral      | <i>Cladosporium</i> sp.       | Lipid-lowering activity                     | IC <sub>50</sub> = 13.1 µM                      | [181] |
| 11-hydroxy-γ-dodecalactone              | Unidentified soft coral      | <i>Cladosporium</i> sp.       | Lipid-lowering activity                     | IC <sub>50</sub> = 7.1 µM                       | [181] |
| Eurothiocin A                           | <i>Sarcophyton</i> sp.       | <i>Eurotium rubrum</i>        | α-glucosidase inhibitory activity           | IC <sub>50</sub> = 17.1 µM                      | [182] |
| Eurothiocin B                           | <i>Sarcophyton</i> sp.       | <i>Eurotium rubrum</i>        | α-glucosidase inhibitory activity           | IC <sub>50</sub> = 42.6 µM                      | [182] |
| Butyrolactone I                         | <i>Sarcophyton</i> sp.       | <i>Eurotium rubrum</i>        | α-glucosidase inhibitory activity           | IC <sub>50</sub> = 98.5 µM                      | [182] |
| Aspernolide D                           | <i>Sarcophyton</i> sp.       | <i>Eurotium rubrum</i>        | α-glucosidase inhibitory activity           | IC <sub>50</sub> = 110.8 µM                     | [182] |
| Vermistatin                             | <i>Sarcophyton</i> sp.       | <i>Eurotium rubrum</i>        | α-glucosidase inhibitory activity           | IC <sub>50</sub> = 107.1 µM                     | [182] |
| Methoxyvermistatin                      | <i>Sarcophyton</i> sp.       | <i>Eurotium rubrum</i>        | α-glucosidase inhibitory activity           | IC <sub>50</sub> = 236 µM                       | [182] |
| (±)-asperteretone A                     | <i>Sarcophyton subviride</i> | <i>Aspergillus terreus</i>    | α-glucosidase inhibitory activity           | IC <sub>50</sub> = 45.4 ± 3.8 to 53.1 ± 1.4 µM  | [165] |
| (±)-asperteretone B                     | <i>Sarcophyton subviride</i> | <i>Aspergillus terreus</i>    | α-glucosidase inhibitory activity           | IC <sub>50</sub> = 17.3 ± 2.4 to 19.2 ± 1.9 µM  | [165] |
| (±)-asperteretone C                     | <i>Sarcophyton subviride</i> | <i>Aspergillus terreus</i>    | α-glucosidase inhibitory activity           | IC <sub>50</sub> = 49.8 ± 5.7 to 52.2 ± 4.64 µM | [165] |
| (±)-asperteretone D                     | <i>Sarcophyton subviride</i> | <i>Aspergillus terreus</i>    | α-glucosidase inhibitory activity           | IC <sub>50</sub> = 15.7 ± 1.1 to 18.9 ± 2.3 µM  | [165] |
| Asperteretone E                         | <i>Sarcophyton subviride</i> | <i>Aspergillus terreus</i>    | α-glucosidase inhibitory activity           | IC <sub>50</sub> = 48.9 ± 7.3 µM                | [165] |
| Tetraorcinol A                          | <i>Cladiella</i> sp.         | <i>Aspergillus versicolor</i> | DPPH radical scavenging activity            | IC <sub>50</sub> = 67 µM                        | [170] |

## References

1. Yan, P.; Lv, Y.; van Ofwegen, L.; Proksch, P.; Lin, W. Lobophytones A–G, new isobiscembranoids from the soft coral *Lobophytum pauciflorum*. *Org. Lett.* **2010**, *12*, 2484–2487, doi:10.1021/ol100567d.
2. Lu, Y.; Su, J.-H.; Huang, C.-Y.; Liu, Y.-C.; Kuo, Y.-H.; Wen, Z.-H.; Hsu, C.-H.; Sheu, J.-H. Cembranoids from the soft corals *Sinularia granosa* and *Sinularia querciformis*. *Chem. Pharm. Bull.* **2010**, *58*, 464–466.
3. Cheng, S.-Y.; Chuang, C.-T.; Wang, S.-K.; Wen, Z.-H.; Chiou, S.-F.; Hsu, C.-H.; Dai, C.-F.; Duh, C.-Y. Antiviral and anti-inflammatory diterpenoids from the soft coral *Sinularia gyrosa*. *J. Nat. Prod.* **2010**, *73*, 1184–1187.
4. Chen, B.W.; Chang, S.M.; Huang, C.Y.; Chao, C.H.; Su, J.H.; Wen, Z.H.; Hsu, C.H.; Dai, C.F.; Wu, Y.C.; Sheu, J.H. Hirsutalins A–H, eunicellin-based diterpenoids from the soft coral *Cladiella hirsuta*. *J. Nat. Prod.* **2010**, *73*, 1785–1791.
5. Cheng, S.Y.; Lin, E.H.; Wen, Z.H.; Chiang, M.Y.; Duh, C.Y. Two new verticillane-type diterpenoids from the Formosan soft coral *Cespitularia hypotentaculata*. *Chem. Pharm. Bull.* **2010**, *58*, 848–851.
6. Chen, B.W.; Chao, C.H.; Su, J.H.; Tsai, C.W.; Wang, W.H.; Wen, Z.H.; Huang, C.Y.; Sung, P.J.; Wu, Y.C.; Sheu, J.H. Klysimplexins I–T, eunicellin-based diterpenoids from the cultured soft coral *Klyxum simplex*. *Org. Biomol. Chem.* **2011**, *9*, 834–844, doi:10.1039/c0ob00351d.
7. Quang, T.H.; Ha, T.T.; Minh, C.V.; Kiem, P.V.; Huong, H.T.; Ngan, N.T.; Nhiem, N.X.; Tung, N.H.; Tai, B.H.; Thuy, D.T., et al. Cytotoxic and anti-inflammatory cembranoids from the Vietnamese soft coral *Lobophytum laevigatum*. *Bioorg. Med. Chem.* **2011**, *19*, 2625–2632, doi:10.1016/j.bmc.2011.03.009.
8. Su, J.H.; Wen, Z.H. Bioactive cembrane-based diterpenoids from the soft coral *Sinularia triangular*. *Mar. Drugs* **2011**, *9*, 944–951, doi:10.3390/md9060944.
9. Zhao, C.; Xu, J.-J.; Wang, J.; Li, S.-Y.; Qiao, W.; Tang, S.-A. Five new cembrane diterpenoids from the South China Sea soft coral *Sinularia flexibilis*. *Phytochem. Lett.* **2018**, *25*, 180–183, doi:10.1016/j.phytol.2018.04.012.
10. Kao, C.Y.; Su, J.H.; Lu, M.C.; Hwang, T.L.; Wang, W.H.; Chen, J.J.; Sheu, J.H.; Kuo, Y.H.; Weng, C.F.; Fang, L.S., et al. Lobocrassins A–E: new cembrane-type diterpenoids from the soft coral *Lobophytum crassum*. *Mar. Drugs* **2011**, *9*, 1319–1331, doi:10.3390/md9081319.
11. Chao, C.H.; Chou, K.J.; Huang, C.Y.; Wen, Z.H.; Hsu, C.H.; Wu, Y.C.; Dai, C.F.; Sheu, J.H. Bioactive cembranoids from the soft coral *Sinularia crassa*. *Mar. Drugs* **2011**, *9*, 1955–1968, doi:10.3390/md9101955.
12. Tai, C.J.; Su, J.H.; Huang, M.S.; Wen, Z.H.; Dai, C.F.; Sheu, J.H. Bioactive eunicellin-based diterpenoids from the soft coral *Cladiella krempfi*. *Mar. Drugs* **2011**, *9*, 2036–2045, doi:10.3390/md9102036.
13. Chao, C.H.; Chou, K.J.; Wen, Z.H.; Wang, G.H.; Wu, Y.C.; Dai, C.F.; Sheu, J.H. Paraminabeolides A–F, cytotoxic and anti-inflammatory marine withanolides from the soft coral *Paraminabea acronocephala*. *J. Nat. Prod.* **2011**, *74*, 1132–1141, doi:10.1021/np2000705.
14. Hsu, F.-J.; Chen, B.-W.; Wen, Z.-H.; Huang, C.-Y.; Dai, C.-F.; Su, J.-H.; Wu, Y.-C.; Sheu, J.-H. Klymollins A–H, bioactive eunicellin-based diterpenoids from the Formosan soft coral *Klyxum molle*. *J. Nat. Prod.* **2011**, *74*, 2467–2471.
15. Lin, W.Y.; Lu, Y.; Su, J.H.; Wen, Z.H.; Dai, C.F.; Kuo, Y.H.; Sheu, J.H. Bioactive cembranoids from the dongsha atoll soft coral *Sarcophyton crassocaule*. *Mar. Drugs* **2011**, *9*, 994–1006, doi:10.3390/md9060994.
16. Putra, M.Y.; Ianaro, A.; Panza, E.; Bavestrello, G.; Cerrano, C.; Fattorusso, E.; Tagliatalata-Scafati, O. Sinularioside, a triacetylated glycolipid from the Indonesian soft coral *Sinularia* sp., is an inhibitor of NO release. *Bioorg. Med. Chem. Lett.* **2012**, *22*, 2723–2725, doi:10.1016/j.bmcl.2012.02.102.
17. Su, J.H.; Huang, C.Y.; Li, P.J.; Lu, Y.; Wen, Z.H.; Kao, Y.H.; Sheu, J.H. Bioactive cadinane-type compounds from the soft coral *Sinularia scabra*. *Arch. Pharm. Res.* **2012**, *35*, 779–784, doi:10.1007/s12272-012-0503-2.
18. Chung, H.M.; Hong, P.H.; Su, J.H.; Hwang, T.L.; Lu, M.C.; Fang, L.S.; Wu, Y.C.; Li, J.J.; Chen, J.J.; Wang, W.H., et al. Bioactive compounds from a gorgonian coral *Echinomuricea* sp. (Plexauridae). *Mar. Drugs* **2012**, *10*, 1169–1179, doi:10.3390/md10051169.

19. Tseng, Y.J.; Shen, K.P.; Lin, H.L.; Huang, C.Y.; Dai, C.F.; Sheu, J.H. Lochmolins A-G, new sesquiterpenoids from the soft coral *Sinularia lochmodes*. *Mar. Drugs* **2012**, *10*, 1572-1581, doi:10.3390/md10071572.
20. Chao, C.H.; Chou, K.J.; Huang, C.Y.; Wen, Z.H.; Hsu, C.H.; Wu, Y.C.; Dai, C.F.; Sheu, J.H. Steroids from the soft coral *Sinularia crassa*. *Mar. Drugs* **2012**, *10*, 439-450, doi:10.3390/md10020439.
21. Lin, W.Y.; Lu, Y.; Chen, B.W.; Huang, C.Y.; Su, J.H.; Wen, Z.H.; Dai, C.F.; Kuo, Y.H.; Sheu, J.H. Sarcocrassocolides M-O, bioactive cembranoids from the Dongsha Atoll soft coral *Sarcophyton crassocaule*. *Mar. Drugs* **2012**, *10*, 617-626, doi:10.3390/md10030617.
22. Fang, H.-Y.; Liaw, C.-C.; Chao, C.-H.; Wen, Z.-H.; Wu, Y.-C.; Hsu, C.-H.; Dai, C.-F.; Sheu, J.-H. Bioactive pregnane-type steroids from the soft coral *Scleronephthya gracillimum*. *Tetrahedron* **2012**, *68*, 9694-9700, doi:10.1016/j.tet.2012.09.060.
23. Huang, C.Y.; Su, J.H.; Duh, C.Y.; Chen, B.W.; Wen, Z.H.; Kuo, Y.H.; Sheu, J.H. A new 9,11-secosterol from the soft coral *Sinularia granosa*. *Bioorg. Med. Chem. Lett.* **2012**, *22*, 4373-4376, doi:10.1016/j.bmcl.2012.05.002.
24. Cheng, C.H.; Chung, H.M.; Hwang, T.L.; Lu, M.C.; Wen, Z.H.; Kuo, Y.H.; Wang, W.H.; Sung, P.J. Echinoclerodane A: a new bioactive clerodane-type diterpenoid from a gorgonian coral *Echinomuricea* sp. *Molecules* **2012**, *17*, 9443-9450, doi:10.3390/molecules17089443.
25. Chen, Y.-H.; Hwang, T.-L.; Su, Y.-D.; Chang, Y.-C.; Chen, Y.-H.; Hong, P.-H.; Hu, L.-C.; Yen, W.-H.; Hsu, H.-Y.; Huang, S.-J. New 6-hydroxyeunicellins from a soft coral *Cladiella* sp. *Chem. Pharm. Bull.* **2012**, *60*, 160-163.
26. Yang, B.; Zhou, X.; Huang, H.; Yang, X.-W.; Liu, J.; Lin, X.; Li, X.; Peng, Y.; Liu, Y. New cembrane diterpenoids from a Hainan soft coral *Sinularia* sp. *Mar. Drugs* **2012**, *10*, doi:10.3390/md10092023.
27. Chen, D.; Chen, W.; Liu, D.; van Ofwegen, L.; Proksch, P.; Lin, W. Asteriscane-type sesquiterpenoids from the soft coral *Sinularia capillosa*. *J. Nat. Prod.* **2013**, *76*, 1753-1763, doi:10.1021/np400480p.
28. Tai, C.J.; Su, J.H.; Huang, C.Y.; Huang, M.S.; Wen, Z.H.; Dai, C.F.; Sheu, J.H. Cytotoxic and anti-inflammatory eunicellin-based diterpenoids from the soft coral *Cladiella kremphi*. *Mar. Drugs* **2013**, *11*, 788-799, doi:10.3390/md11030788.
29. Thao, N.P.; Nam, N.H.; Cuong, N.X.; Quang, T.H.; Tung, P.T.; Dat le, D.; Chae, D.; Kim, S.; Koh, Y.S.; Kiem, P.V., et al. Anti-inflammatory norditerpenoids from the soft coral *Sinularia maxima*. *Bioorg. Med. Chem. Lett.* **2013**, *23*, 228-231, doi:10.1016/j.bmcl.2012.10.129.
30. Nguyen, P.T.; Nguyen, H.N.; Nguyen, X.C.; Nguyen, X.N.; Pham, T.T.; Tran, H.Q.; Nguyen, T.T.N.; Phan, V.K.; Chau, V.M.; Kim, Y.H. A new sterol from the soft coral *Lobophytum crassum*. *Bull. Korean Chem. Soc.* **2013**, *34*, 249-251, doi:10.5012/bkcs.2013.34.1.249.
31. Fang, H.Y.; Hsu, C.H.; Chao, C.H.; Wen, Z.H.; Wu, Y.C.; Dai, C.F.; Sheu, J.H. Cytotoxic and anti-inflammatory metabolites from the soft coral *Scleronephthya gracillimum*. *Mar. Drugs* **2013**, *11*, 1853-1865, doi:10.3390/md11061853.
32. Yin, J.; Zhao, M.; Ma, M.; Xu, Y.; Xiang, Z.; Cai, Y.; Dong, J.; Lei, X.; Huang, K.; Yan, P. New casbane diterpenoids from a South China Sea soft coral, *Sinularia* sp. *Mar. Drugs* **2013**, *11*, 455-465, doi:10.3390/md11020455.
33. Cheng, Y.B.; Fazary, A.E.; Lin, Y.C.; Lo, I.W.; Ong, S.C.; Chen, S.Y.; Chien, C.T.; Lin, Y.J.; Lin, W.W.; Shen, Y.C. Hyperinakin, a new anti-inflammatory phloroglucinol derivative from *Hypericum nakamurai*. *Nat. Prod. Res.* **2013**, *27*, 727-734, doi:10.1080/14786419.2012.695365.
34. Chao, C.H.; Wu, Y.C.; Wen, Z.H.; Sheu, J.H. Steroidal carboxylic acids from soft coral *Paraminabea acronocephala*. *Mar. Drugs* **2013**, *11*, 136-145, doi:10.3390/md11010136.
35. Lin, Y.F.; Kuo, C.Y.; Wen, Z.H.; Lin, Y.Y.; Wang, W.H.; Su, J.H.; Sheu, J.H.; Sung, P.J. Flexibilisquinone, a new anti-inflammatory quinone from the cultured soft coral *Sinularia flexibilis*. *Molecules* **2013**, *18*, 8160-8167, doi:10.3390/molecules18078160.
36. Lee, Y.N.; Tai, C.J.; Hwang, T.L.; Sheu, J.H. Krempfielins J-M, new eunicellin-based diterpenoids from the soft coral *Cladiella kremphi*. *Mar. Drugs* **2013**, *11*, 2741-2750, doi:10.3390/md11082741.
37. Lin, M.C.; Chen, B.W.; Huang, C.Y.; Dai, C.F.; Hwang, T.L.; Sheu, J.H. Eunicellin-based diterpenoids from the Formosan soft coral *Klyxum molle* with inhibitory activity on superoxide generation and elastase release by neutrophils. *J. Nat. Prod.* **2013**, *76*, 1661-1667, doi:10.1021/np400372v.

38. Chen, B.-W.; Wang, S.-Y.; Huang, C.-Y.; Chen, S.-L.; Wu, Y.-C.; Sheu, J.-H. Hirsutalins I–M, eunicellin-based diterpenoids from the soft coral *Cladiella hirsuta*. *Tetrahedron* **2013**, *69*, 2296-2301, doi:10.1016/j.tet.2013.01.015.
39. Yang, B.; Liao, S.; Lin, X.; Wang, J.; Liu, J.; Zhou, X.; Yang, X.; Liu, Y. New sinularianin sesquiterpenes from soft coral *Sinularia* sp. *Mar. Drugs* **2013**, *11*, 4741-4750, doi:10.3390/md11124741.
40. Thao, N.P.; Luyen, B.T.; Ngan, N.T.; Song, S.B.; Cuong, N.X.; Nam, N.H.; Kiem, P.V.; Kim, Y.H.; Minh, C.V. New anti-inflammatory cembranoid diterpenoids from the Vietnamese soft coral *Lobophytum crassum*. *Bioorg. Med. Chem. Lett.* **2014**, *24*, 228-232, doi:10.1016/j.bmcl.2013.11.033.
41. Cuong, N.X.; Thao, N.P.; Luyen, B.T.T.; Ngan, N.T.T.; Thuy, D.T.T.; Song, S.B.; Nam, N.H.; Van Kiem, P.; Kim, Y.H.; Van Minh, C. Cembranoid diterpenes from the soft coral *Lobophytum crassum* and their anti-inflammatory activities. *Chem. Pharm. Bull.* **2014**, *62*, 203-208.
42. Thao, N.P.; Nam, N.H.; Cuong, N.X.; Luyen, B.T.; Tai, B.H.; Kim, J.E.; Song, S.B.; Kiem, P.V.; Minh, C.V.; Kim, Y.H. Inhibition of NF-kappaB transcriptional activation in HepG2 cells by diterpenoids from the soft coral *Sinularia maxima*. *Arch. Pharm. Res.* **2014**, *37*, 706-712, doi:10.1007/s12272-013-0230-3.
43. Chung, H.M.; Wang, W.H.; Hwang, T.L.; Chen, J.J.; Fang, L.S.; Wen, Z.H.; Wang, Y.B.; Wu, Y.C.; Sung, P.J. Rumphellools A and B, new caryophyllene sesquiterpenoids from a Formosan gorgonian coral, *Rumphella antipathies*. *Int. J. Mol. Sci.* **2014**, *15*, 15679-15688, doi:10.3390/ijms150915679.
44. Liaw, C.C.; Cheng, Y.B.; Lin, Y.S.; Kuo, Y.H.; Hwang, T.L.; Shen, Y.C. New briarane diterpenoids from Taiwanese soft coral *Briareum violacea*. *Mar. Drugs* **2014**, *12*, 4677-4692, doi:10.3390/md12084677.
45. Chung, H.M.; Wang, W.H.; Hwang, T.L.; Fang, L.S.; Wen, Z.H.; Chen, J.J.; Wu, Y.C.; Sung, P.J. Rumphellaolic acid A, a novel sesquiterpenoid from the formosan gorgonian coral *Rumphella antipathies*. *Mar. Drugs* **2014**, *12*, 5856-5863, doi:10.3390/md12125856.
46. Thao, N.P.; Luyen, B.T.; Sun, Y.N.; Song, S.B.; Thanh, N.V.; Cuong, N.X.; Nam, N.H.; Kiem, P.V.; Kim, Y.H.; Minh, C.V. NF-kappaB inhibitory activity of polyoxygenated steroids from the Vietnamese soft coral *Sarcophyton pauciplicatum*. *Bioorg. Med. Chem. Lett.* **2014**, *24*, 2834-2838, doi:10.1016/j.bmcl.2014.04.103.
47. Lee, Y.N.; Tai, C.J.; Hwang, T.L.; Sheu, J.H. Krempfielins N-P, new anti-inflammatory eunicellins from a Taiwanese soft coral *Cladiella krempfi*. *Mar. Drugs* **2014**, *12*, 1148-1156, doi:10.3390/md12021148.
48. Lin, K.H.; Tseng, Y.J.; Chen, B.W.; Hwang, T.L.; Chen, H.Y.; Dai, C.F.; Sheu, J.H. Tortuosenes A and B, new diterpenoid metabolites from the Formosan soft coral *Sarcophyton tortuosum*. *Org. Lett.* **2014**, *16*, 1314-1317, doi:10.1021/ol403723b.
49. Lin, W.Y.; Chen, B.W.; Huang, C.Y.; Wen, Z.H.; Sung, P.J.; Su, J.H.; Dai, C.F.; Sheu, J.H. Bioactive cembranoids, sarcocrassocolides P-R, from the Dongsha Atoll soft coral *Sarcophyton crassocaule*. *Mar. Drugs* **2014**, *12*, 840-850, doi:10.3390/md12020840.
50. Huang, T.Z.; Chen, B.W.; Huang, C.Y.; Hwang, T.L.; Dai, C.F.; Sheu, J.H. Eunicellin-based diterpenoids, hirsutalins N-R, from the formosan soft coral *Cladiella hirsuta*. *Mar. Drugs* **2014**, *12*, 2446-2457, doi:10.3390/md12052446.
51. Chang, F.Y.; Hsu, F.J.; Tai, C.J.; Wei, W.C.; Yang, N.S.; Sheu, J.H. Klymollins T-X, bioactive eunicellin-based diterpenoids from the soft coral *Klyxum molle*. *Mar. Drugs* **2014**, *12*, 3060-3071, doi:10.3390/md12053060.
52. Tai, C.J.; Chokkalingam, U.; Cheng, Y.; Shih, S.P.; Lu, M.C.; Su, J.H.; Hwang, T.L.; Sheu, J.H. Krempfielins Q and R, two new eunicellin-based diterpenoids from the soft coral *Cladiella krempfi*. *Int. J. Mol. Sci.* **2014**, *15*, 21865-21874, doi:10.3390/ijms151221865.
53. Phan, C.S.; Ng, S.Y.; Kim, E.A.; Jeon, Y.J.; Palaniveloo, K.; Vairappan, C.S. Capgermacrenes A and B, bioactive secondary metabolites from a Bornean soft coral, *Capnella* sp. *Mar. Drugs* **2015**, *13*, 3103-3115, doi:10.3390/md13053103.
54. Huang, T.Z.; Chen, B.W.; Huang, C.Y.; Hwang, T.L.; Uvarani, C.; Dai, C.F.; Sung, P.J.; Su, J.H.; Sheu, J.H. Eunicellin-based diterpenoids, Hirsutalins S-V, from the Formosan soft coral *Cladiella hirsuta*. *Mar. Drugs* **2015**, *13*, 2757-2769, doi:10.3390/md13052757.
55. Chao, C.-H.; Huang, T.-Z.; Wu, C.-Y.; Chen, B.-W.; Huang, C.-Y.; Hwang, T.-L.; Dai, C.-F.; Sheu, J.-H. Steroidal and  $\alpha$ -tocopherylhydroquinone glycosides from two soft corals *Cladiella hirsuta* and *Sinularia nanolobata*. *RSC Adv.* **2015**, *5*, 74256-74262, doi:10.1039/c5ra13436f.

56. Huang, C.Y.; Tseng, Y.J.; Chokkalingam, U.; Hwang, T.L.; Hsu, C.H.; Dai, C.F.; Sung, P.J.; Sheu, J.H. Bioactive isoprenoid-derived natural products from a Dongsha Atoll soft coral *Sinularia erecta*. *J. Nat. Prod.* **2016**, *79*, 1339-1346, doi:10.1021/acs.jnatprod.5b01142.
57. Tsai, C.-R.; Huang, C.-Y.; Chen, B.-W.; Tsai, Y.-Y.; Shih, S.-P.; Hwang, T.-L.; Dai, C.-F.; Wang, S.-Y.; Sheu, J.-H. New bioactive steroids from the soft coral *Klyxum flaccidum*. *RSC Adv.* **2015**, *5*, 12546-12554, doi:10.1039/c4ra13977a.
58. Huang, C.Y.; Sung, P.J.; Uvarani, C.; Su, J.H.; Lu, M.C.; Hwang, T.L.; Dai, C.F.; Wu, S.L.; Sheu, J.H. Glaucumolides A and B, biscembranoids with new structural type from a cultured soft coral *Sarcophyton glaucum*. *Sci. Rep.* **2015**, *5*, 15624, doi:10.1038/srep15624.
59. Hsiao, T.H.; Sung, C.S.; Lan, Y.H.; Wang, Y.C.; Lu, M.C.; Wen, Z.H.; Wu, Y.C.; Sung, P.J. New anti-inflammatory cembranes from the cultured soft coral *Nephthea columnaris*. *Mar. Drugs* **2015**, *13*, 3443-3453, doi:10.3390/md13063443.
60. Yin, C.-T.; Wen, Z.-H.; Lan, Y.-H.; Chang, Y.-C.; Wu, Y.-C.; Sung, P.-J. New anti-inflammatory norcembranoids from the soft coral *Sinularia numerosa*. *Chem. Pharm. Bull.* **2015**, *63*, 752-756.
61. Roy, P.K.; Ashimine, R.; Miyazato, H.; Taira, J.; Ueda, K. New casbane and cembrane diterpenoids from an Okinawan soft coral, *Lobophytum* sp. *Molecules* **2016**, *21*, doi:10.3390/molecules21050679.
62. Tsai, Y.Y.; Huang, C.Y.; Tseng, W.R.; Chiang, P.L.; Hwang, T.L.; Su, J.H.; Sung, P.J.; Dai, C.F.; Sheu, J.H. Klyflaccisteroids K-M, bioactive steroidal derivatives from a soft coral *Klyxum flaccidum*. *Bioorg. Med. Chem. Lett.* **2017**, *27*, 1220-1224, doi:10.1016/j.bmcl.2017.01.060.
63. Chang, Y.C.; Kuo, L.M.; Hwang, T.L.; Yeh, J.; Wen, J.H.; Fang, L.S.; Wu, Y.C.; Lin, C.S.; Sheu, J.H.; Sung, P.J. Pinnisterols A-C, new 9,11-secoosterols from a Gorgonian *Pinnigorgia* sp. *Mar. Drugs* **2016**, *14*, doi:10.3390/md14010012.
64. Huang, C.Y.; Chang, C.W.; Tseng, Y.J.; Lee, J.; Sung, P.J.; Su, J.H.; Hwang, T.L.; Dai, C.F.; Wang, H.C.; Sheu, J.H. Bioactive steroids from the Formosan soft coral *Umbellulifera petasites*. *Mar. Drugs* **2016**, *14*, doi:10.3390/md14100180.
65. Hassan, M.; Mohammed, R.; Hetta, M.; Abdelaziz, T.; El-Gendy, A.; Sleim, M. Biological and chemical investigation of the soft coral *Lobophytum pauciflorum* collected from the Egyptian red sea. *International Journal of Pharmacognosy and Phytochemical Research* **2016**, *8*, 906-911.
66. Su, Y.D.; Sung, C.S.; Wen, Z.H.; Chen, Y.H.; Chang, Y.C.; Chen, J.J.; Fang, L.S.; Wu, Y.C.; Sheu, J.H.; Sung, P.J. New 9-hydroxybriarane diterpenoids from a Gorgonian coral *Briareum* sp. (Briareidae). *Int. J. Mol. Sci.* **2016**, *17*, doi:10.3390/ijms17010079.
67. Tseng, W.R.; Huang, C.Y.; Tsai, Y.Y.; Lin, Y.S.; Hwang, T.L.; Su, J.H.; Sung, P.J.; Dai, C.F.; Sheu, J.H. New cytotoxic and anti-inflammatory steroids from the soft coral *Klyxum flaccidum*. *Bioorg. Med. Chem. Lett.* **2016**, *26*, 3253-3257, doi:10.1016/j.bmcl.2016.05.060.
68. Yuan, W.; Cheng, S.; Fu, W.; Zhao, M.; Li, X.; Cai, Y.; Dong, J.; Huang, K.; Gustafson, K.R.; Yan, P. Structurally diverse metabolites from the soft coral *Sinularia verruca* collected in the South China sea. *J. Nat. Prod.* **2016**, *79*, 1124-1131, doi:10.1021/acs.jnatprod.6b00031.
69. Zhao, M.; Cheng, S.; Yuan, W.; Xi, Y.; Li, X.; Dong, J.; Huang, K.; Gustafson, K.R.; Yan, P. Cembranoids from a Chinese collection of the soft coral *Lobophytum crassum*. *Mar. Drugs* **2016**, *14*, doi:10.3390/md14060111.
70. Chao, C.H.; Wu, C.Y.; Huang, C.Y.; Wang, H.C.; Dai, C.F.; Wu, Y.C.; Sheu, J.H. Cubitanoids and cembranoids from the soft coral *Sinularia nanolobata*. *Mar. Drugs* **2016**, *14*, doi:10.3390/md14080150.
71. Huang, C.Y.; Ahmed, A.F.; Su, J.H.; Sung, P.J.; Hwang, T.L.; Chiang, P.L.; Dai, C.F.; Liaw, C.C.; Sheu, J.H. Bioactive new withanolides from the cultured soft coral *Sinularia brassica*. *Bioorg. Med. Chem. Lett.* **2017**, *27*, 3267-3271, doi:10.1016/j.bmcl.2017.06.029.
72. Li, W.; Zou, Y.H.; Ge, M.X.; Lou, L.L.; Xu, Y.S.; Ahmed, A.; Chen, Y.Y.; Zhang, J.S.; Tang, G.H.; Yin, S. Biscembranoids and cembranoids from the soft coral *Sarcophyton elegans*. *Mar. Drugs* **2017**, *15*, doi:10.3390/md15040085.
73. Ahmed, A.F.; Teng, W.T.; Huang, C.Y.; Dai, C.F.; Hwang, T.L.; Sheu, J.H. Anti-inflammatory lobane and prenyleudesmane diterpenoids from the soft coral *Lobophytum varium*. *Mar. Drugs* **2017**, *15*, doi:10.3390/md15100300.

74. Wu, Q.; Li, X.W.; Li, H.; Yao, L.G.; Tang, W.; Miao, Z.H.; Wang, H.; Guo, Y.W. Bioactive polyoxygenated cembranoids from a novel Hainan chemotype of the soft coral *Sinularia flexibilis*. *Bioorg. Med. Chem. Lett.* **2019**, *29*, 185-188, doi:10.1016/j.bmcl.2018.12.004.
75. Liu, M.; Qi, C.; Sun, W.; Shen, L.; Wang, J.; Liu, J.; Lai, Y.; Xue, Y.; Hu, Z.; Zhang, Y.  $\alpha$ -Glucosidase inhibitors from the coral-associated fungus *Aspergillus terreus*. *Front. Chem.* **2018**, *6*, 422, doi:10.3389/fchem.2018.00422.
76. Huang, C.Y.; Tseng, W.R.; Ahmed, A.F.; Chiang, P.L.; Tai, C.J.; Hwang, T.L.; Dai, C.F.; Sheu, J.H. Anti-inflammatory polyoxygenated steroids from the soft coral *Lobophytum michaelae*. *Mar. Drugs* **2018**, *16*, doi:10.3390/md16030093.
77. Wu, C.H.; Chao, C.H.; Huang, T.Z.; Huang, C.Y.; Hwang, T.L.; Dai, C.F.; Sheu, J.H. Cembranoid-related metabolites and biological activities from the soft coral *Sinularia flexibilis*. *Mar. Drugs* **2018**, *16*, doi:10.3390/md16080278.
78. Januar, H.I.; Chasanah, E.; Motti, C.A.; Tapiolas, D.M.; Liptrot, C.H.; Wright, A.D. Cytotoxic cembranes from Indonesian specimens of the soft coral *Nephthea* sp. *Mar. Drugs* **2010**, *8*, 2142-2152, doi:10.3390/md8072142.
79. Nguyen, H.T.; Chau, V.M.; Phan, V.K.; Hoang, T.H.; Nguyen, H.N.; Nguyen, X.C.; Tran, H.Q.; Nguyen, X.N.; Hyun, J.H.; Kang, H.K., et al. Chemical components from the Vietnamese soft coral *Lobophytum* sp. *Arch. Pharm. Res.* **2010**, *33*, 503-508, doi:10.1007/s12272-010-0402-3.
80. Chen, B.-W.; Su, J.-H.; Dai, C.-F.; Sung, P.-J.; Wu, Y.-C.; Lin, Y.-T.; Sheu, J.-H. Two new cembranes from a Formosan soft coral *Sinularia facile*. *Bull. Chem. Soc. Jpn.* **2011**, *84*, 1371-1373, doi:10.1246/bcsj.20110186.
81. Chau, V.M.; Phan, V.K.; Nguyen, X.; Nguyen, X.C.; Nguyen, P.T.; Nguyen, H.N.; Hoang, T.A.; Do, C.T.; Thuy, D.T.; Kang, H.K., et al. Cytotoxic and antioxidant activities of diterpenes and sterols from the Vietnamese soft coral *Lobophytum compactum*. *Bioorg. Med. Chem. Lett.* **2011**, *21*, 2155-2159, doi:10.1016/j.bmcl.2011.01.072.
82. Su, C.C.; Su, J.H.; Lin, J.J.; Chen, C.C.; Hwang, W.I.; Huang, H.H.; Wu, Y.J. An investigation into the cytotoxic effects of 13-acetoxysarcocrassolide from the soft coral *Sarcophyton crassocaule* on bladder cancer cells. *Mar. Drugs* **2011**, *9*, 2622-2642, doi:10.3390/md9122622.
83. Hegazy, M.-E.F.; El-Beih, A.A.; Moustafa, A.Y.; Hamdy, A.A.; Alhammady, M.A.; Selim, R.M.; Abdel-Rehim, M.; Paré, P.W. Cytotoxic Cembranoids from the Red Sea Soft Coral *Sarcophyton glaucum*. *Nat. Prod. Commun.* **2011**, *6*, 1934578X1100601, doi:10.1177/1934578x1100601205.
84. LIAO, X.-j.; TANG, L.-d.; LIANG, Y.-w.; GENG, H.-w.; XU, S.-h. Isolation and identification of two new polyhydroxylated sterols from soft coral *Sinularia* sp. *Chem. Res. Chinese U.* **2011**, *27*, 217-220.
85. Lee, N.L.; Su, J.H. Tetrahydrofuran cembranoids from the cultured soft coral *Lobophytum crassum*. *Mar. Drugs* **2011**, *9*, 2526-2536, doi:10.3390/md9122526.
86. Cheng, S.Y.; Huang, K.J.; Wang, S.K.; Duh, C.Y. Capilloquinol: a novel farnesyl quinol from the Dongsha atoll soft coral *Sinularia capillosa*. *Mar. Drugs* **2011**, *9*, 1469-1476, doi:10.3390/md9091469.
87. Quang, T.H.; Ha, T.T.; Minh, C.V.; Kiem, P.V.; Huong, H.T.; Ngan, N.T.; Nhiem, N.X.; Tung, N.H.; Thao, N.P.; Thuy, D.T., et al. Cytotoxic and PPARs transcriptional activities of sterols from the Vietnamese soft coral *Lobophytum laevigatum*. *Bioorg. Med. Chem. Lett.* **2011**, *21*, 2845-2849, doi:10.1016/j.bmcl.2011.03.089.
88. Lin, Y.S.; Eid Fazary, A.; Chen, C.H.; Kuo, Y.H.; Shen, Y.C. Bioactive xenicane diterpenoids from the Taiwanese soft coral *Asterospicularia laurae*. *Chem. Biodivers.* **2011**, *8*, 1310-1317.
89. Elshamy, A.I.; Abdel-Razik, A.F.; Nassar, M.I.; Mohamed, T.K.; Ibrahim, M.A.; El-Kousy, S.M. A new gorgostane derivative from the Egyptian Red Sea soft coral *Heteroxenia ghardaensis*. *Nat. Prod. Res.* **2013**, *27*, 1250-1254, doi:10.1080/14786419.2012.724417.
90. Shi, H.; Yu, S.; Liu, D.; van Ofwegen, L.; Proksch, P.; Lin, W. Sinularones A-I, new cyclopentenone and butenolide derivatives from a marine soft coral *Sinularia* sp. and their antifouling activity. *Mar. Drugs* **2012**, *10*, 1331-1344, doi:10.3390/md10061331.
91. Hegazy, M.E.; Gamal Eldeen, A.M.; Shahat, A.A.; Abdel-Latif, F.F.; Mohamed, T.A.; Whittlesey, B.R.; Pare, P.W. Bioactive hydroperoxyl cembranoids from the Red Sea soft coral *Sarcophyton glaucum*. *Mar. Drugs* **2012**, *10*, 209-222, doi:10.3390/md10010209.
92. Roy, P.K.; Maarisit, W.; Roy, M.C.; Taira, J.; Ueda, K. Five new diterpenoids from an Okinawan soft coral, *Cespitularia* sp. *Mar. Drugs* **2012**, *10*, 2741-2748, doi:10.3390/md10122741.

93. Li, R.; Shao, C.L.; Qi, X.; Li, X.B.; Li, J.; Sun, L.L.; Wang, C.Y. Polyoxygenated sterols from the South China Sea soft coral *Sinularia* sp. *Mar. Drugs* **2012**, *10*, 1422-1432, doi:10.3390/md10071422.
94. Wang, S.K.; Duh, C.Y. New cytotoxic cembranolides from the soft coral *Lobophytum michaelae*. *Mar. Drugs* **2012**, *10*, 306-318, doi:10.3390/md10020306.
95. Wang, S.K.; Hsieh, M.K.; Duh, C.Y. Three new cembranoids from the Taiwanese soft coral *Sarcophyton ehrenbergi*. *Mar. Drugs* **2012**, *10*, 1433-1444, doi:10.3390/md10071433.
96. Wang, S.K.; Puu, S.Y.; Duh, C.Y. New 19-oxygenated steroids from the soft coral *Nephthea chabrolii*. *Mar. Drugs* **2012**, *10*, 1288-1296, doi:10.3390/md10061288.
97. Chen, S.-P.; Chen, B.-W.; Dai, C.-F.; Sung, P.-J.; Wu, Y.-C.; Sheu, J.-H. Sarcophytonins F and G, new dihydrofuranocembranoids from a Dongsha Atoll soft coral *Sarcophyton* sp. *Bull. Chem. Soc. Jpn.* **2012**, *85*, 920-922, doi:10.1246/bcsj.20120100.
98. Govindam, S.V.; Yoshioka, Y.; Kanamoto, A.; Fujiwara, T.; Okamoto, T.; Ojika, M. Cyclolobatriene, a novel prenylated germacrene diterpene, from the soft coral *Lobophytum pauciflorum*. *Bioorg. Med. Chem.* **2012**, *20*, 687-692, doi:10.1016/j.bmc.2011.12.012.
99. Alarif, W.M.; Abdel-lateff, A.; Al-lihaibi, S.S.; Ayyad, S.-E.N.; Badria, F.A.; Alsofyani, A.A.; Abou-Elnaga, Z.S. Marine bioactive steryl esters from the Red Sea black coral *Antipathes dichotoma*. *CLEAN - Soil, Air, Water* **2013**, *41*, 1116-1121, doi:10.1002/clen.201200409.
100. Yen, W.H.; Hu, L.C.; Su, J.H.; Lu, M.C.; Twan, W.H.; Yang, S.Y.; Kuo, Y.C.; Weng, C.F.; Lee, C.H.; Kuo, Y.H., et al. Norcembranoidal diterpenes from a Formosan soft coral *Sinularia* sp. *Molecules* **2012**, *17*, 14058-14066, doi:10.3390/molecules171214058.
101. Su, C.C.; Wong, B.S.; Chin, C.; Wu, Y.J.; Su, J.H. Oxygenated cembranoids from the soft coral *Sinularia flexibilis*. *Int. J. Mol. Sci.* **2013**, *14*, 4317-4325, doi:10.3390/ijms14024317.
102. Huang, C.Y.; Liaw, C.C.; Chen, B.W.; Chen, P.C.; Su, J.H.; Sung, P.J.; Dai, C.F.; Chiang, M.Y.; Sheu, J.H. Withanolide-based steroids from the cultured soft coral *Sinularia brassica*. *J. Nat. Prod.* **2013**, *76*, 1902-1908, doi:10.1021/np400454q.
103. Aboutabl el, S.A.; Azzam, S.M.; Michel, C.G.; Selim, N.M.; Hegazy, M.F.; Ali, A.H.; Hussein, A.A. Bioactive terpenoids from the Red Sea soft coral *Sinularia polydactyla*. *Nat. Prod. Res.* **2013**, *27*, 2224-2226, doi:10.1080/14786419.2013.805333.
104. Zhang, J.; Li, L.-C.; Wang, K.-L.; Liao, X.-J.; Deng, Z.; Xu, S.-H. Pentacyclic hemiacetal sterol with antifouling and cytotoxic activities from the soft coral *Nephthea* sp. *Bioorg. Med. Chem. Lett.* **2013**, *23*, 1079-1082, doi:https://doi.org/10.1016/j.bmcl.2012.12.012.
105. Gong, K.K.; Tang, X.L.; Zhang, G.; Cheng, C.L.; Zhang, X.W.; Li, P.L.; Li, G.Q. Polyhydroxylated steroids from the South China Sea soft coral *Sarcophyton* sp. and their cytotoxic and antiviral activities. *Mar. Drugs* **2013**, *11*, 4788-4798, doi:10.3390/md11124788.
106. Zhao, M.; Yin, J.; Jiang, W.; Ma, M.; Lei, X.; Xiang, Z.; Dong, J.; Huang, K.; Yan, P. Cytotoxic and antibacterial cembranoids from a South China Sea soft coral, *Lobophytum* sp. *Mar. Drugs* **2013**, *11*, 1162-1172, doi:10.3390/md11041162.
107. Ellithey, M.S.; Lall, N.; Hussein, A.A.; Meyer, D. Cytotoxic, cytostatic and HIV-1 PR inhibitory activities of the soft coral *Litophyton arboreum*. *Mar. Drugs* **2013**, *11*, 4917-4936, doi:10.3390/md11124917.
108. Rajaram, S.; Ramulu, U.; Ramesh, D.; Srikanth, D.; Bhattacharya, P.; Prabhakar, P.; Kalivendi, S.V.; Babu, K.S.; Venkateswarlu, Y.; Navath, S. Anti-cancer evaluation of carboxamides of furano-sesquiterpene carboxylic acids from the soft coral *Sinularia kavarrattensis*. *Bioorg. Med. Chem. Lett.* **2013**, *23*, 6234-6238, doi:10.1016/j.bmcl.2013.09.093.
109. Tsai, T.C.; Wu, Y.J.; Su, J.H.; Lin, W.T.; Lin, Y.S. A new spatane diterpenoid from the cultured soft coral *Sinularia leptoclados*. *Mar. Drugs* **2013**, *11*, 114-123, doi:10.3390/md11010114.
110. Yen, W.H.; Chen, W.F.; Cheng, C.H.; Dai, C.F.; Lu, M.C.; Su, J.H.; Su, Y.D.; Chen, Y.H.; Chang, Y.C.; Chen, Y.H., et al. A new 5 $\alpha$ ,8 $\alpha$ -epidioxysterol from the soft coral *Sinularia gaweli*. *Molecules* **2013**, *18*, 2895-2903, doi:10.3390/molecules18032895.
111. Tseng, Y.J.; Wang, S.K.; Duh, C.Y. Secosteroids and norcembranoids from the soft coral *Sinularia nanolobata*. *Mar. Drugs* **2013**, *11*, 3288-3296, doi:10.3390/md11093288.

112. Cai, Y.-S.; Yao, L.-G.; Di Pascale, A.; Irace, C.; Mollo, E.; Tagliatalata-Scafati, O.; Guo, Y.-W. Polyoxygenated diterpenoids of the eunicellin-type from the Chinese soft coral *Cladiella krempfi*. *Tetrahedron* **2013**, *69*, 2214-2219, doi:10.1016/j.tet.2012.12.051.
113. Xio, Y.J.; Su, J.H.; Chen, B.W.; Tseng, Y.J.; Wu, Y.C.; Sheu, J.H. Oxygenated ylangene-derived sesquiterpenoids from the soft coral *Lemalia philippinensis*. *Mar. Drugs* **2013**, *11*, 3735-3741, doi:10.3390/md11103735.
114. Elkhateeb, A.; El-Beih, A.A.; Gamal-Eldeen, A.M.; Alhammady, M.A.; Ohta, S.; Pare, P.W.; Hegazy, M.E. New terpenes from the Egyptian soft coral *Sarcophyton ehrenbergi*. *Mar. Drugs* **2014**, *12*, 1977-1986, doi:10.3390/md12041977.
115. Kuo, C.Y.; Juan, Y.S.; Lu, M.C.; Chiang, M.Y.; Dai, C.F.; Wu, Y.C.; Sung, P.J. Pregnane-type steroids from the Formosan soft coral *Scleronephthya flexilis*. *Int. J. Mol. Sci.* **2014**, *15*, 10136-10149, doi:10.3390/ijms150610136.
116. Elkhayat, E.S.; Ibrahim, S.R.M.; Fouad, M.A.; Mohamed, G.A. Dendronephthols A–C, new sesquiterpenoids from the Red Sea soft coral *Dendronephthya* sp. *Tetrahedron* **2014**, *70*, 3822-3825, doi:10.1016/j.tet.2014.03.056.
117. Al-Footy, K.O.; Alarif, W.M.; Asiri, F.; Aly, M.M.; Ayyad, S.-E.N. Rare pyrane-based cembranoids from the Red Sea soft coral *Sarcophyton trocheliophorum* as potential antimicrobial–antitumor agents. *Med. Chem. Res.* **2014**, *24*, 505-512, doi:10.1007/s00044-014-1147-1.
118. Lei, L.-F.; Chen, M.-F.; Wang, T.; He, X.-X.; Liu, B.-X.; Deng, Y.; Chen, X.-J.; Li, Y.-T.; Guan, S.-Y.; Yao, J.-H., et al. Novel cytotoxic nine-membered macrocyclic polysulfur cembranoid lactones from the soft coral *Sinularia* sp. *Tetrahedron* **2014**, *70*, 6851-6858, doi:10.1016/j.tet.2014.07.042.
119. Eltahawy, N.A.; Ibrahim, A.K.; Radwan, M.M.; ElSohly, M.A.; Hassanean, H.A.; Ahmed, S.A. Cytotoxic cembranoids from the Red Sea soft coral, *Sarcophyton auritum*. *Tetrahedron Lett.* **2014**, *55*, 3984-3988, doi:10.1016/j.tetlet.2014.05.013.
120. Roy, P.K.; Roy, M.C.; Taira, J.; Ueda, K. Structure and bioactivity of a trisnorditerpenoid and a diterpenoid from an Okinawan soft coral, *Cespitularia* sp. *Tetrahedron Lett.* **2014**, *55*, 1421-1423, doi:10.1016/j.tetlet.2014.01.035.
121. Cheng, S.Y.; Shih, N.L.; Hou, K.Y.; Ger, M.J.; Yang, C.N.; Wang, S.K.; Duh, C.Y. Kelsoenethiol and dikelsoenyl ether, two unique kelsoane-type sesquiterpenes, from the Formosan soft coral *Nephthea erecta*. *Bioorg. Med. Chem. Lett.* **2014**, *24*, 473-475, doi:10.1016/j.bmcl.2013.12.037.
122. Cheng, S.Y.; Shih, N.L.; Chuang, C.T.; Chiou, S.F.; Yang, C.N.; Wang, S.K.; Duh, C.Y. Sinugyrosanolide A, an unprecedented C-4 norcembranoid, from the Formosan soft coral *Sinularia gyrosa*. *Bioorg. Med. Chem. Lett.* **2014**, *24*, 1562-1564, doi:10.1016/j.bmcl.2014.01.073.
123. Al-Lihaibi, S.S.; Alarif, W.M.; Abdel-Lateff, A.; Ayyad, S.E.; Abdel-Naim, A.B.; El-Senduny, F.F.; Badria, F.A. Three new cembranoid-type diterpenes from Red Sea soft coral *Sarcophyton glaucum*: isolation and antiproliferative activity against HepG2 cells. *Eur. J. Med. Chem.* **2014**, *81*, 314-322, doi:10.1016/j.ejmech.2014.05.016.
124. Tseng, Y.J.; Yang, Y.C.; Wang, S.K.; Duh, C.Y. Numerosol A-D, new cembranoid diterpenes from the soft coral *Sinularia numerosa*. *Mar. Drugs* **2014**, *12*, 3371-3380, doi:10.3390/md12063371.
125. Lin, Y.C.; Wang, S.S.; Chen, C.H.; Kuo, Y.H.; Shen, Y.C. Cespitulones A and B, cytotoxic diterpenoids of a new structure class from the soft coral *Cespitularia taeniata*. *Mar. Drugs* **2014**, *12*, 3477-3486, doi:10.3390/md12063477.
126. Ghandourah, M.A.; Alarif, W.M.; Abdel-Lateff, A.; Al-Lihaibi, S.S.; Ayyad, S.-E.N.; Basaif, S.A.; Badria, F.A. Two new terpenoidal derivatives: a himachalene-type sesquiterpene and 13,14-secosteroid from the soft coral *Litophyton arboreum*. *Med. Chem. Res.* **2015**, *24*, 4070-4077, doi:10.1007/s00044-015-1456-z.
127. Zhang, N.X.; Tang, X.L.; van Ofwegen, L.; Xue, L.; Song, W.J.; Li, P.L.; Li, G.Q. Cyclopentenone derivatives and polyhydroxylated steroids from the soft coral *Sinularia acuta*. *Chem. Biodivers.* **2015**, *12*, 273-283.
128. Nam, N.H.; Tung, P.T.; Ngoc, N.T.; Hanh, T.T.H.; Thao, N.P.; Thanh, N.V.; Cuong, N.X.; Thao, D.T.; Huong, T.T.; Thung, D.C., et al. Cytotoxic biscembranoids from the soft coral *Sarcophyton pauciplicatum*. *Chem. Pharm. Bull.* **2015**, *63*, 636–640.
129. Cheng, S.Y.; Wang, S.K.; Hsieh, M.K.; Duh, C.Y. Polyoxygenated cembrane diterpenoids from the soft coral *Sarcophyton ehrenbergi*. *Int. J. Mol. Sci.* **2015**, *16*, 6140-6152, doi:10.3390/ijms16036140.

130. Chen, W.-T.; Li, J.; Wang, J.-R.; Li, X.-W.; Guo, Y.-W. Structural diversity of terpenoids in the soft coral *Sinularia flexibilis*, evidenced by a collection from the South China Sea. *RSC Adv.* **2015**, *5*, 23973-23980.
131. Al-Footy, K.O.; Alarif, W.M.; Zubair, M.S.; Ghandourah, M.A.; Aly, M.M. Antibacterial and cytotoxic properties of isoprenoids from the red sea soft coral, *Lobophytum* sp. *Tropical Journal of Pharmaceutical Research* **2016**, *15*, 1431, doi:10.4314/tjpr.v15i7.11.
132. Koncic, M.Z.; Ioannou, E.; Sawadogo, W.R.; Abdel-Razik, A.F.; Vagias, C.; Diederich, M.; Roussis, V. 4alpha-methylated steroids with cytotoxic activity from the soft coral *Litophyton mollis*. *Steroids* **2016**, *115*, 130-135, doi:10.1016/j.steroids.2016.08.017.
133. Xu, M.W.; Hao, Y.T. A new sesquiterpene from the South China Sea gorgonian coral *Subergorgia suberosa*. *Nat. Prod. Res.* **2016**, *30*, 2402-2406, doi:10.1080/14786419.2016.1190720.
134. Ngoc, N.T.; Huong, P.T.M.; Thanh, N.V.; Cuong, N.X.; Nam, N.H.; Thung, D.C.; Kiem, P.V.; Minh, C.V. Steroid constituents from the soft coral *Sinularia nanolobata*. *Chem. Pharm. Bull.* **2016**, *64*, 1417-1419.
135. Tsai, T.C.; Huang, Y.T.; Chou, S.K.; Shih, M.C.; Chiang, C.Y.; Su, J.H. Cytotoxic oxygenated steroids from the soft coral *Nephthea erecta*. *Chem. Pharm. Bull.* **2016**, *64*, 1519-1522.
136. Trifman, Y.J.; Akinin, M.; Gauvin-Bialecki, A.; Benayahu, Y.; Carmeli, S.; Kashman, Y. Bisdioxycalamenene: a bis-sesquiterpene from the soft coral *Rhytisma fulvum*. *Mar. Drugs* **2016**, *14*, doi:10.3390/md14020041.
137. Urda, C.; Fernandez, R.; Perez, M.; Rodriguez, J.; Jimenez, C.; Cuevas, C. Protobenicins A and B, cytotoxic long-chain acylated Xenicanes from the soft coral *Protodendron repens*. *J. Nat. Prod.* **2017**, *80*, 713-719, doi:10.1021/acs.jnatprod.7b00046.
138. Chao, C.H.; Li, W.L.; Huang, C.Y.; Ahmed, A.F.; Dai, C.F.; Wu, Y.C.; Lu, M.C.; Liaw, C.C.; Sheu, J.H. Isoprenoids from the soft coral *Sarcophyton glaucum*. *Mar. Drugs* **2017**, *15*, doi:10.3390/md15070202.
139. Zhao, M.; He, T.; Shi, S.K.; Song, L.X.; Lu, Y. A new dolabellane diterpene and a new polyacetylene from the soft coral *Clavularia viridis*. *Nat. Prod. Res.* **2018**, *32*, 1104-1108, doi:10.1080/14786419.2017.1380025.
140. Mohammed, R.; Radwan, M.M.; Ma, G.; Mohamed, T.A.; Seliem, M.A.; Thabet, M.; ElSohly, M.A. Bioactive sterols and sesquiterpenes from the Red Sea soft coral *Sinularia terspilli*. *Med. Chem. Res.* **2017**, *26*, 1647-1652, doi:10.1007/s00044-017-1876-z.
141. Gao, Y.; Xiao, W.; Liu, H.-C.; Wang, J.-R.; Yao, L.-G.; Ouyang, P.-K.; Wang, D.-C.; Guo, Y.-W. Clavirolide G, a new rare dolabellane-type diterpenoid from the Xisha soft coral *Clavularia viridis*. *Chin. Chem. Lett.* **2017**, *28*, 905-908, doi:10.1016/j.ccl.2017.01.004.
142. Sun, P.; Meng, L.Y.; Tang, H.; Liu, B.S.; Li, L.; Yi, Y.; Zhang, W. Sinularosides A and B, bioactive 9,11-secosteroidal glycosides from the South China Sea soft coral *Sinularia humilis* Ofwegen. *J. Nat. Prod.* **2012**, *75*, 1656-1659, doi:10.1021/np300475d.
143. Liang, L.F.; Wang, X.J.; Zhang, H.Y.; Liu, H.L.; Li, J.; Lan, L.F.; Zhang, W.; Guo, Y.W. Bioactive polyhydroxylated steroids from the Hainan soft coral *Sinularia depressa* Tixier-Durivault. *Bioorg. Med. Chem. Lett.* **2013**, *23*, 1334-1337, doi:10.1016/j.bmcl.2012.12.087.
144. Liang, L.-F.; Lan, L.-F.; Tagliatela-Scafati, O.; Guo, Y.-W. Sartrolides A-G and bissartrolide, new cembranolides from the South China Sea soft coral *Sarcophyton trocheliophorum* Marenzeller. *Tetrahedron* **2013**, *69*, 7381-7386, doi:10.1016/j.tet.2013.06.068.
145. Abou El-Ezz, R.F.; Ahmed, S.A.; Radwan, M.M.; Ayoub, N.A.; Afifi, M.S.; Ross, S.A.; Szymanski, P.T.; Fahmy, H.; Khalifa, S.I. Bioactive cembranoids from the Red Sea soft coral *Sarcophyton glaucum*. *Tetrahedron Lett.* **2013**, *54*, 989-992, doi:10.1016/j.tetlet.2012.12.037.
146. Wang, Z.; Tang, H.; Wang, P.; Gong, W.; Xue, M.; Zhang, H.; Liu, T.; Liu, B.; Yi, Y.; Zhang, W. Bioactive polyoxygenated steroids from the South China sea soft coral, *Sarcophyton* sp. *Mar. Drugs* **2013**, *11*, 775-787, doi:10.3390/md11030775.
147. Elshamy, A.I.; Nassar, M.I.; Mohamed, T.K.; Madkour, H.A. A new hydroxymethyl diacylglycerol from methanol extract of Egyptian soft coral *Heteroxenia ghardaqensis*. *Journal of Biologically Active Products from Nature* **2015**, *5*, 172-177, doi:10.1080/22311866.2015.1090339.

148. Rajaram, S.; Ramesh, D.; Ramulu, U.; Anjum, M.; Kumar, P.; Murthy, U.; Hussain, M.A.; Sastry, G.N.; Venkateswarlu, Y. Chemical examination of the soft coral *Sinularia kavarttiensis* and evaluation of anti-microbial activity. *Indian J. Chem.* **2014**, *53B*, 1086-1090.
149. Suna, X.P.; Cao, F.; Shao, C.L.; Wang, M.; Zhang, X.L.; Wang, C.Y. Antibacterial  $\Delta^1$ -3-ketosteroids from the South China Sea Gorgonian coral *Subergorgia rubra*. *Chem. Biodivers.* **2015**, *12*, 1068-1074.
150. Angulo-Preckler, C.; Genta-Jouve, G.; Mahajan, N.; de la Cruz, M.; de Pedro, N.; Reyes, F.; Iken, K.; Avila, C.; Thomas, O.P. Gersemiols A–C and eunicellol A, diterpenoids from the Arctic soft coral *Gersemia fruticosa*. *J. Nat. Prod.* **2016**, *79*, 1132-1136, doi:10.1021/acs.jnatprod.6b00040.
151. Phan, C.S.; Vairappan, C.S. Capgermacrenes D-G, new sesquiterpenoids from a Bornean soft coral, *Capnella imbricata*. *Nat. Prod. Res.* **2017**, *31*, 742-748, doi:10.1080/14786419.2016.1241997.
152. Zubair, M.; Alarif, W.; Al-Footy, K.; Ph, M.; Ali, M.; Basaif, S.; Al-Lihaibi, S.; Ayyad, S.-E. New antimicrobial bisembrane hydrocarbon and cembranoid diterpenes from the soft coral *Sarcophyton trocheliophorum*. *Turk. J. Chem.* **2016**, *40*, 385-392, doi:10.3906/kim-1502-82.
153. Tani, K.; Kamada, T.; Phan, C.S.; Vairappan, C.S. New cembrane-type diterpenoids from Bornean soft coral *Nephthea* sp. with antifungal activity against *Lagenidium thermophilum*. *Nat. Prod. Res.* **2018**, 10.1080/14786419.2018.1475387, 1-7, doi:10.1080/14786419.2018.1475387.
154. Wang, S.K.; Hsieh, M.K.; Duh, C.Y. New diterpenoids from soft coral *Sarcophyton ehrenbergi*. *Mar. Drugs* **2013**, *11*, 4318-4327, doi:10.3390/md11114318.
155. Cheng, S.Y.; Wang, S.K.; Duh, C.Y. Secocrassumol, a seco-cembranoid from the Dongsha Atoll soft coral *Lobophytum crassum*. *Mar. Drugs* **2014**, *12*, 6028-6037, doi:10.3390/md12126028.
156. Cheng, W.; Ren, J.; Huang, Q.; Long, H.; Jin, H.; Zhang, L.; Liu, H.; van Ofwegen, L.; Lin, W. Pregnane steroids from a gorgonian coral *Subergorgia suberosa* with anti-flu virus effects. *Steroids* **2016**, *108*, 99-104, doi:10.1016/j.steroids.2016.02.003.
157. Lai, D.; Geng, Z.; Deng, Z.; van Ofwegen, L.; Proksch, P.; Lin, W. Cembranoids from the soft coral *Sinularia rigida* with antifouling activities. *J. Agric. Food Chem.* **2013**, *61*, 4585-4592, doi:10.1021/jf401303q.
158. Zhang, J.; Liang, Y.; Wang, K.L.; Liao, X.J.; Deng, Z.; Xu, S.H. Antifouling steroids from the South China Sea gorgonian coral *Subergorgia suberosa*. *Steroids* **2014**, *79*, 1-6, doi:10.1016/j.steroids.2013.10.007.
159. Wang, J.; Su, P.; Gu, Q.; Li, W.D.; Guo, J.L.; Qiao, W.; Feng, D.Q.; Tang, S.A. Antifouling activity against bryozoan and barnacle by cembrane diterpenes from the soft coral *Sinularia flexibilis*. *Int. Biodeterior. Biodegrad.* **2017**, *120*, 97-103, doi:10.1016/j.ibiod.2017.02.013.
160. Bonnard, I.; Jhaumeer-Laulloo, S.B.; Bontemps, N.; Banaigs, B.; Aknin, M. New lobane and cembrane diterpenes from two comorian soft corals. *Mar. Drugs* **2010**, *8*, 359-372, doi:10.3390/md8020359.
161. Putra, M.Y.; Murniasih, T.; Swasono, R.T.; Wibowo, J.T.; Saputri, A.N.C.; Widhiana, M.R.; Arlyza, I.S. Secondary metabolites and their biological activities in Indonesian soft coral of the genus *Lobophytum*. *Asian Pac. J. Trop. Biomed.* **2016**, *6*, 909-913, doi:10.1016/j.apjtb.2016.08.011.
162. Liang, L.-F.; Kurtán, T.; Mándi, A.; Gao, L.-X.; Li, J.; Zhang, W.; Guo, Y.-W. Sarsolenane and capnosane diterpenes from the Hainan soft coral *Sarcophyton trocheliophorum* Marenzeller as PTP1B Inhibitors. *Eur. J. Org. Chem.* **2014**, *2014*, 1841-1847, doi:10.1002/ejoc.201301683.
163. Ye, F.; Zhu, Z.D.; Gu, Y.C.; Li, J.; Zhu, W.L.; Guo, Y.W. Further new diterpenoids as PTP1B inhibitors from the Xisha soft coral *Sinularia polydactyla*. *Mar. Drugs* **2018**, *16*, doi:10.3390/md16040103.
164. Kodani, S.; Sato, K.; Higuchi, T.; Casareto, B.E.; Suzuki, Y. Montiporic acid D, a new polyacetylene carboxylic acid from scleractinian coral *Montipora digitata*. *Nat. Prod. Res.* **2013**, *27*, 1859-1862, doi:10.1080/14786419.2013.768992.
165. Liu, M.; Zhou, Q.; Wang, J.; Liu, J.; Qi, C.; Lai, Y.; Zhu, H.; Xue, Y.; Hu, Z.; Zhang, Y. Anti-inflammatory butenolide derivatives from the coral-derived fungus *Aspergillus terreus* and structure revisions of aspernolides D and G, butyrolactone VI and 4',8''-diacetoxy butyrolactone VI. *RSC Adv.* **2018**, *8*, 13040-13047, doi:10.1039/c8ra01840e.

166. Zheng, C.J.; Shao, C.L.; Guo, Z.Y.; Chen, J.F.; Deng, D.S.; Yang, K.L.; Chen, Y.Y.; Fu, X.M.; She, Z.G.; Lin, Y.C., et al. Bioactive hydroanthraquinones and anthraquinone dimers from a soft coral-derived *Alternaria* sp. fungus. *J. Nat. Prod.* **2012**, *75*, 189-197, doi:10.1021/np200766d.
167. Li, H.J.; Xie, Y.L.; Xie, Z.L.; Chen, Y.; Lam, C.K.; Lan, W.J. Chondrosterins A-E, triquinane-type sesquiterpenoids from soft coral-associated fungus *Chondrostereum* sp. *Mar. Drugs* **2012**, *10*, 627-638, doi:10.3390/md10030627.
168. Fu, P.; Kong, F.; Wang, Y.; Wang, Y.; Liu, P.; Zuo, G.; Zhu, W. Antibiotic metabolites from the coral-associated Actinomycete *Streptomyces* sp. OUCMDZ-1703. *Chin. J. Chem.* **2013**, *31*, 100-104, doi:10.1002/cjoc.201201062.
169. Wang, W.; Liao, Y.; Tang, C.; Huang, X.; Luo, Z.; Chen, J.; Cai, P. Cytotoxic and antibacterial compounds from the coral-derived fungus *Aspergillus tritici* SP2-8-1. *Mar. Drugs* **2017**, *15*, doi:10.3390/md15110348.
170. Zhuang, Y.; Teng, X.; Wang, Y.; Liu, P.; Li, G.; Zhu, W. New quinazolinone alkaloids within rare amino acid residue from coral-associated fungus, *Aspergillus versicolor* LCJ-5-4. *Org. Lett.* **2011**, *13*, 1130-1133.
171. Wei, M.Y.; Li, D.; Shao, C.L.; Deng, D.S.; Wang, C.Y. (±)-Pestalachloride D, an antibacterial racemate of chlorinated benzophenone derivative from a soft coral-derived fungus *Pestalotiopsis* sp. *Mar. Drugs* **2013**, *11*, 1050-1060, doi:10.3390/md11041050.
172. Bao, J.; Sun, Y.L.; Zhang, X.Y.; Han, Z.; Gao, H.C.; He, F.; Qian, P.Y.; Qi, S.H. Antifouling and antibacterial polyketides from marine gorgonian coral-associated fungus *Penicillium* sp. SCSGAF 0023. *J. Antibiot. (Tokyo)* **2013**, *66*, 219-223, doi:10.1038/ja.2012.110.
173. Zheng, C.J.; Shao, C.L.; Wu, L.Y.; Chen, M.; Wang, K.L.; Zhao, D.L.; Sun, X.P.; Chen, G.Y.; Wang, C.Y. Bioactive phenylalanine derivatives and cytochalasins from the soft coral-derived fungus, *Aspergillus elegans*. *Mar. Drugs* **2013**, *11*, 2054-2068, doi:10.3390/md11062054.
174. Shao, C.L.; Xu, R.F.; Wang, C.Y.; Qian, P.Y.; Wang, K.L.; Wei, M.Y. Potent antifouling marine dihydroquinolin-2(1H)-one-containing alkaloids from the Gorgonian coral-derived fungus *Scopulariopsis* sp. *Mar. Biotechnol. (N. Y.)* **2015**, *17*, 408-415, doi:10.1007/s10126-015-9628-x.
175. Raina, J.B.; Tapiolas, D.; Motti, C.A.; Foret, S.; Seemann, T.; Tebben, J.; Willis, B.L.; Bourne, D.G. Isolation of an antimicrobial compound produced by bacteria associated with reef-building corals. *PeerJ* **2016**, *4*, e2275, doi:10.7717/peerj.2275.
176. Brana, A.F.; Sarmiento-Vizcaino, A.; Osset, M.; Perez-Victoria, I.; Martin, J.; de Pedro, N.; de la Cruz, M.; Diaz, C.; Vicente, F.; Reyes, F., et al. Lobophorin K, a new natural product with cytotoxic activity produced by *Streptomyces* sp. M-207 associated with the deep-sea coral *Lophelia pertusa*. *Mar. Drugs* **2017**, *15*, doi:10.3390/md15050144.
177. Shnit-Orland, M.; Sivan, A.; Kushmaro, A. Antibacterial activity of *Pseudoalteromonas* in the coral holobiont. *Microb. Ecol.* **2012**, *64*, 851-859, doi:10.1007/s00248-012-0086-y.
178. Zhang, X.; Sun, Y.; Bao, J.; He, F.; Xu, X.; Qi, S. Phylogenetic survey and antimicrobial activity of culturable microorganisms associated with the South China Sea black coral *Antipathes dichotoma*. *FEMS Microbiol. Lett.* **2012**, *336*, 122-130, doi:10.1111/j.1574-6968.2012.02662.x.
179. Jia, Y.-L.; Guan, F.-F.; Ma, J.; Wang, C.-Y.; Shao, C.-L. Pestalotiolid A, a new antiviral phthalide derivative from a soft coral-derived fungus *Pestalotiopsis* sp. *Nat. Prod. Sci.* **2015**, *21*, 227, doi:10.20307/nps.2015.21.4.227.
180. Hawas, U.W.; El-Desouky, S.; Abou El-Kassem, L.; Elkhateeb, W. Alternariol derivatives from *Alternaria alternata*, an endophytic fungus residing in red sea soft coral, inhibit HCV NS3/4A protease. *Appl. Biochem. Microbiol.* **2015**, *51*, 579-584, doi:10.1134/s0003683815050099.
181. Zhu, M.; Gao, H.; Wu, C.; Zhu, T.; Che, Q.; Gu, Q.; Guo, P.; Li, D. Lipid-lowering polyketides from a soft coral-derived fungus *Cladosporium* sp. TZIP29. *Bioorg. Med. Chem. Lett.* **2015**, *25*, 3606-3609, doi:10.1016/j.bmcl.2015.06.072.
182. Liu, Z.; Xia, G.; Chen, S.; Liu, Y.; Li, H.; She, Z. Eurothiocin A and B, sulfur-containing benzofurans from a soft coral-derived fungus *Eurotium rubrum* SH-823. *Mar. Drugs* **2014**, *12*, 3669-3680, doi:10.3390/md12063669.
